# Supplementary material for: A statistical framework for assessing pharmacological responses and biomarkers using uncertainty estimates
Source: eLife journal article supplement (doi:10.7554/elife.60352), 2020-12-04

**A**

Cell lines treated with dabrafenib

BRAF in COREAD

- Mutant
- Wild-type

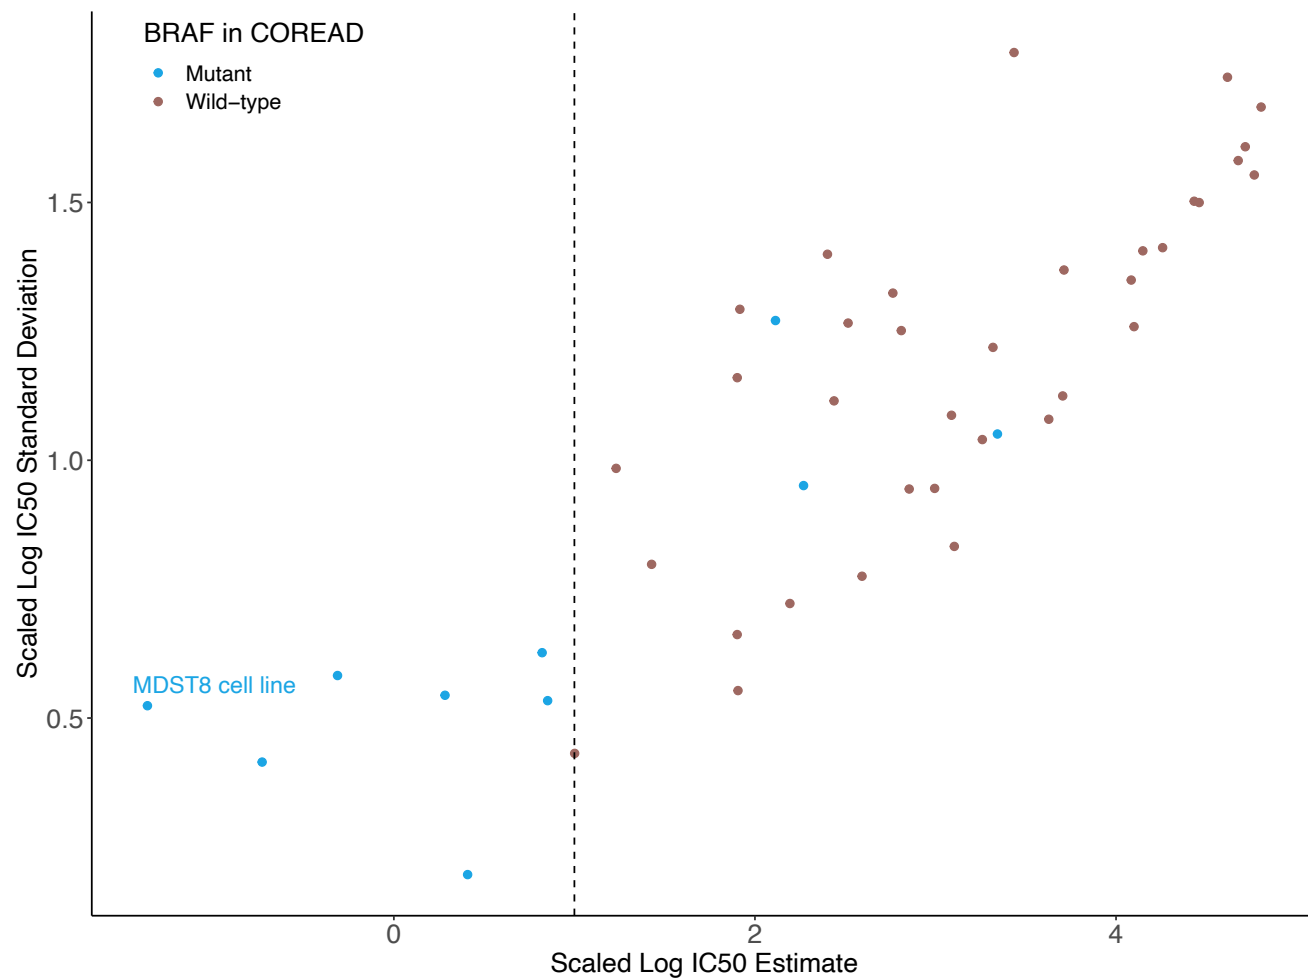**B**

Cell lines treated with lenalidomide

gain:cnaSKCM12 (KRAS) in SKCM

- Mutant
- Wild-type

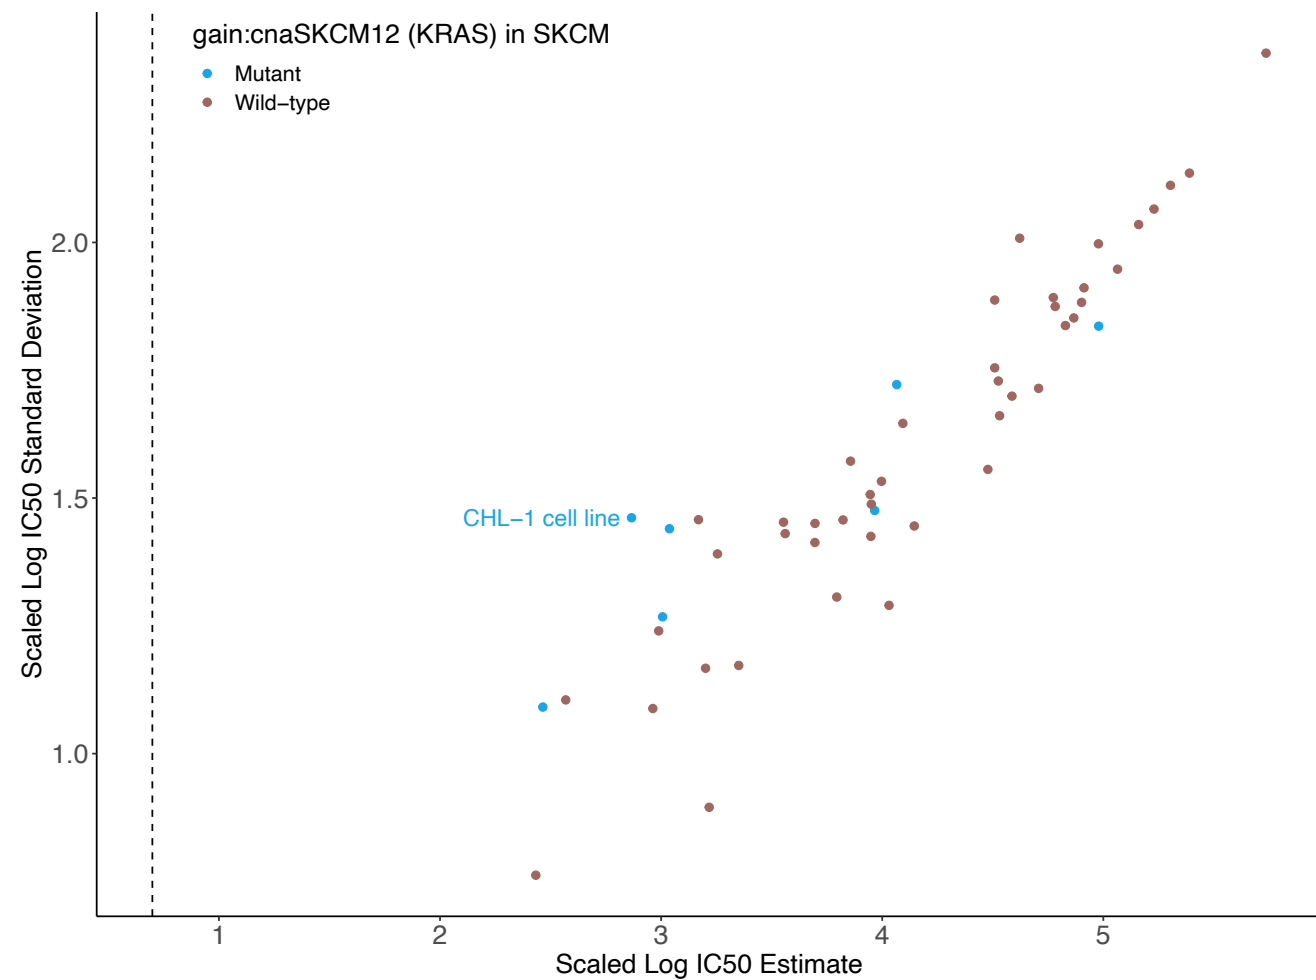

Supplement: supp [file elife-60352-supp-v1.zip]
