# Supplementary material for: A statistical framework for assessing pharmacological responses and biomarkers using uncertainty estimates
Source: eLife journal article supplement (doi:10.7554/elife.60352), 2020-12-04

**A**

Adjusted p-value (-log10) [Sigmond]

FDR 20%

Effect size (Cohen's d)

-10

5

**B**

Adjusted p-value (-log10) [GP]

FDR 20%

Effect size (Cohen's d)

-10

5

TCGA - cancer type

- BLCA
- BRCA
- COREAD
- DLBC
- ESCA
- GBM
- HNSC
- KIRC
- LAML
- LGG
- LIHC
- LUAD
- LUSC
- OV
- PAAD
- PRAD
- SKCM
- STAD
- THCA
- UCEC

**C**

Signed adj. p-value [Sigmond]

-4

-10

-5

Signed adj. p-value [GP]

5

10

15

Percentage of cases where IC50 &gt; max conc

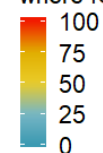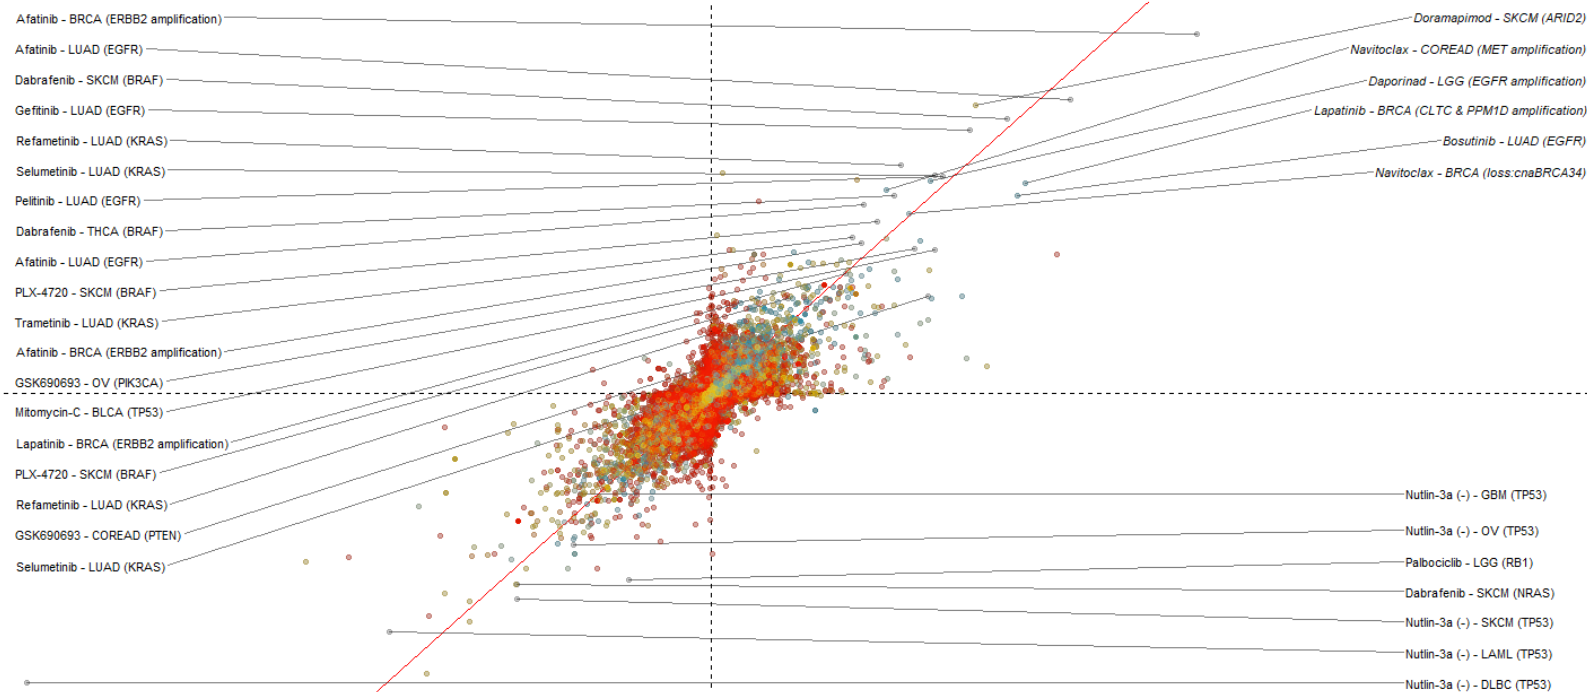

Supplement: supp [file elife-60352-supp-v1.zip]
