# Supplementary material for: A statistical framework for assessing pharmacological responses and biomarkers using uncertainty estimates
Source: eLife. 2020 Dec 4;9:e60352. doi: 10.7554/eLife.60352 (PMC7746236; doi:10.7554/eLife.60352)
Supplement: Supplementary file 4. [file elife-60352-supp4.xlsx]

## Sheet: GP_fits_final_v2
Supplementary Table S4: GP curve fits dataset with calculated summary statistics
Drug	Drug_Name	Cell_Line	AUC	AUC_Std	IC50	IC50_Std	p_IC50	LL	COSMIC_ID	FOLD_DILUTION	MAX_CONC	FOLD_NUMBER
1	Erlotinib	EB-3	0.975116	0.00628248	3.20602	1.58404	0.0196	12.3144	906847	2	2	8
1	Erlotinib	BB65-RCC	0.694064	0.0223694	-1.35952	0.840024	0.9756	-28.8044	753533	2	2	8
1	Erlotinib	NB69	0.953482	0.00859048	2.50681	1.77113	0.2452	24.4189	908440	2	2	8
1	Erlotinib	NCI-H82	0.871846	0.0140017	2.48137	1.92822	0.4564	4.18899	688031	2	2	8
1	Erlotinib	HCC2218	0.932541	0.010342	2.90823	1.96969	0.1746	6.73788	749716	2	2	8
1	Erlotinib	CW-2	0.980565	0.00739603	3.54361	2.0395	0.0126	-12.2461	910554	2	2	8
1	Erlotinib	CMK	0.99506	0.0011244	2.57621	1.82353	0.0134	52.0144	910566	2	2	8
1	Erlotinib	SW872	0.952339	0.00926313	2.54244	1.76123	0.1	9.57808	909756	2	2	8
1	Erlotinib	SNB75	0.988635	0.00338979	3.28209	1.63564	0.0064	27.0773	905982	2	2	8
1	Erlotinib	JiyoyeP-2003	0.993497	0.00157376	2.65182	1.90586	0.0254	37.588	907268	2	2	8
1	Erlotinib	NCI-H128	0.995541	0.00106523	3.07911	1.66831	0.0052	56.5472	753597	2	2	8
1	Erlotinib	OVCAR-4	0.706719	0.0278815	0.513822	2.15577	0.7988	-9.91633	905990	2	2	8
1	Erlotinib	KMOE-2	0.990262	0.00249806	3.11213	1.78534	0.0066	21.845	907280	2	2	8
1	Erlotinib	NCI-H747	0.834644	0.0158254	2.09501	1.79287	0.6258	2.69344	908457	2	2	8
1	Erlotinib	NB12	0.987683	0.00382141	3.16682	1.77877	0.0114	8.80858	949172	2	2	8
1	Erlotinib	AMO-1	0.995458	0.00110347	2.94567	1.89946	0.0052	54.9229	1295741	2	2	8
1	Erlotinib	MFM-223	0.996058	0.000837554	2.91318	1.68689	0.0046	64.5575	910948	2	2	8
1	Erlotinib	ES8	0.960541	0.00846128	2.51149	1.81175	0.1396	8.3598	949155	2	2	8
1	Erlotinib	NB13	0.915294	0.0112091	2.28135	1.90221	0.4278	18.9581	949177	2	2	8
1	Erlotinib	JURL-MK1	0.983158	0.00400971	2.38628	1.79499	0.1426	30.6887	1327771	2	2	8
1	Erlotinib	SF126	0.963702	0.00782641	3.25126	1.6695	0.0126	23.7642	909712	2	2	8
1	Erlotinib	NCI-H322M	0.808224	0.0166422	2.04731	1.71688	0.6524	2.62972	905967	2	2	8
1	Erlotinib	MHH-NB-11	0.992066	0.00213445	3.02546	1.63544	0.0086	32.483	908135	2	2	8
1	Erlotinib	EW-18	0.980197	0.00512055	3.39585	2.61864	0.0098	28.382	949164	2	2	8
1	Erlotinib	DG-75	0.996051	0.000884564	2.59	1.01584	0.0048	64.5575	906838	2	2	8
1	Erlotinib	KCL-22	0.980981	0.00448546	2.76761	1.96156	0.1146	22.3359	1330931	2	2	8
1	Erlotinib	Daudi	0.905513	0.0126263	2.85285	1.87032	0.2284	5.58064	906831	2	2	8
1	Erlotinib	NOMO-1	0.994298	0.00133086	2.60928	1.61345	0.0284	50.0545	908451	2	2	8
1	Erlotinib	NCI-H2141	0.958148	0.00817263	3.33343	1.70235	0.0266	8.66374	688014	2	2	8
1	Erlotinib	H9	0.960645	0.0075562	2.42386	1.88328	0.245	6.17356	907043	2	2	8
1	Erlotinib	LS-411N	0.848178	0.0172038	2.07762	1.93295	0.5616	-10.6367	907794	2	2	8
1	Erlotinib	NCI-H209	0.914184	0.0114017	2.01085	1.83307	0.5214	11.5625	688013	2	2	8
1	Erlotinib	CA46	0.966026	0.00665769	2.80589	1.80511	0.1418	13.6753	910703	2	2	8
1	Erlotinib	D-247MG	0.806627	0.0174636	2.0379	2.48388	0.4252	-13.2809	946367	2	2	8
1	Erlotinib	LOUCY	0.987812	0.00311831	2.67855	1.72904	0.0552	24.082	907789	2	2	8
1	Erlotinib	CL-11	0.994937	0.00118285	2.83425	1.44862	0.006	49.0174	1290769	2	2	8
1	Erlotinib	RXF393	0.987968	0.00428566	2.98741	1.55472	0.0076	1.08437	905978	2	2	8
1	Erlotinib	NCI-H211	0.992512	0.00231836	2.90097	1.68802	0.009	44.6735	1240189	2	2	8
1	Erlotinib	BL-70	0.879619	0.0139074	2.25207	1.91467	0.5282	6.53223	910707	2	2	8
1	Erlotinib	LU-65	0.872339	0.0145909	2.40633	1.86978	0.462	5.92784	724863	2	2	8
1	Erlotinib	NCI-H1417	0.996069	0.000803611	3.22994	1.34464	0.0046	64.5575	688001	2	2	8
1	Erlotinib	SU-DHL-4	0.784465	0.0156863	-0.0822992	0.0699035	0.9994	2.29492	1331035	2	2	8
1	Erlotinib	NB10	0.880709	0.00905962	0.00457545	0.0359559	1	29.9848	949171	2	2	8
1	Erlotinib	NB4	0.992053	0.00221213	2.52079	1.51473	0.0332	40.334	1323913	2	2	8
1	Erlotinib	NCI-H23	0.994508	0.00137208	3.18115	1.99195	0.0046	41.5441	905942	2	2	8
1	Erlotinib	LS-513	0.710411	0.0188667	1.00747	1.64667	0.8224	-1.04085	907795	2	2	8
1	Erlotinib	EM-2	0.990318	0.0024988	2.50903	1.62549	0.0642	50.7955	906855	2	2	8
1	Erlotinib	NBsusSR	0.931935	0.00946375	2.2349	2.02261	0.4306	7.99221	925342	2	2	8
1	Erlotinib	A101D	0.956186	0.00737359	2.44912	1.93132	0.2886	9.15508	910921	2	2	8
1	Erlotinib	GB-1	0.940816	0.00997613	2.74671	1.67376	0.095	2.29797	687568	2	2	8
1	Erlotinib	CESS	0.996095	0.000879337	2.74121	1.17609	0.004	64.5575	910688	2	2	8
1	Erlotinib	ALL-PO	0.854418	0.0208632	2.02385	1.74253	0.599	4.02794	910944	2	2	8
1	Erlotinib	EC-GI-10	0.980422	0.00469987	2.57908	1.66036	0.0982	37.0743	753555	2	2	8
1	Erlotinib	UACC-812	0.995426	0.00110114	2.95398	0.91831	0.0036	56.527	910910	2	2	8
1	Erlotinib	OPM-2	0.99455	0.00130787	2.97542	1.39846	0.0044	44.8977	909249	2	2	8
1	Erlotinib	HCC-33	0.996064	0.000866449	2.29704	0.679669	0.0034	64.5575	1303901	2	2	8
1	Erlotinib	JSC-1	0.981254	0.00441885	2.37781	1.88132	0.1624	45.1258	1327769	2	2	8
1	Erlotinib	GDM-1	0.983882	0.00371293	2.59441	1.77778	0.1022	25.5863	906870	2	2	8
1	Erlotinib	TE-1	0.613238	0.0208149	-1.32722	0.230699	0.9934	-1.54541	753621	2	2	8
1	Erlotinib	SK-LMS-1	0.982827	0.00478721	2.9755	1.511	0.0078	34.6524	909720	2	2	8
1	Erlotinib	NU-DUL-1	0.996082	0.000838557	2.88459	1.21051	0.0042	64.5575	1330982	2	2	8
1	Erlotinib	NCI-H2107	0.866319	0.0140614	2.67845	1.97445	0.4	3.23049	924246	2	2	8
1	Erlotinib	UACC-257	0.697627	0.0788355	0.13556	1.70623	0.7702	-31.7782	905977	2	2	8
1	Erlotinib	GOTO	0.994931	0.00120949	2.97463	1.43569	0.005	48.9136	906875	2	2	8
1	Erlotinib	RCC10RGB	0.784064	0.0195856	2.27019	2.01996	0.544	-11.1443	909974	2	2	8
1	Erlotinib	KARPAS-422	0.99572	0.00103241	3.03667	1.37992	0.0042	45.6145	907274	2	2	8
1	Erlotinib	OCI-AML5	0.97462	0.00523994	2.5792	1.86662	0.1804	10.2388	1330983	2	2	8
1	Erlotinib	MEG-01	0.946265	0.00920091	2.52325	1.9649	0.3052	9.111	908126	2	2	8
1	Erlotinib	Ramos-2G6-4C10	0.99472	0.00127194	2.3802	1.18632	0.0322	56.7679	910401	2	2	8
1	Erlotinib	P3HR-1	0.995741	0.000969716	3.00765	1.75182	0.0042	59.2772	1330988	2	2	8
1	Erlotinib	MLMA	0.989347	0.00278744	2.43139	1.71452	0.0796	45.9711	908142	2	2	8
1	Erlotinib	NCI-H1770	0.994875	0.00126884	3.00103	1.48667	0.0062	48.3194	687804	2	2	8
1	Erlotinib	RPMI-8866	0.996061	0.000856905	2.87891	1.79299	0.0044	64.5575	910544	2	2	8
1	Erlotinib	CAS-1	0.888069	0.0170891	3.19714	1.5191	0.0494	-11.8796	910943	2	2	8
1	Erlotinib	SK-PN-DW	0.965706	0.00639873	2.36758	1.81949	0.2672	7.84387	909731	2	2	8
1	Erlotinib	U-87-MG	0.996126	0.000827872	2.75687	0.933447	0.005	64.5575	687590	2	2	8
1	Erlotinib	NCI-SNU-16	0.968286	0.00672999	2.48411	1.86741	0.16	8.78227	908446	2	2	8
1	Erlotinib	SW684	0.942274	0.009897	3.30116	2.23139	0.0244	9.24648	909754	2	2	8
1	Erlotinib	SCC-3	0.980117	0.00452976	2.76664	1.93518	0.0846	12.9947	910930	2	2	8
1	Erlotinib	BT-474	0.975255	0.00550318	2.636	1.90501	0.1432	20.2524	946359	2	2	8
1	Erlotinib	NCI-H1648	0.432195	0.0191523	-1.41213	0.115709	0.9948	-7.14481	687799	2	2	8
1	Erlotinib	HUTU-80	0.993527	0.0020031	2.32819	0.606911	0.0052	29.9275	907073	2	2	8
1	Erlotinib	KNS-42	0.862696	0.0150444	2.36824	1.81998	0.4566	-7.84995	907282	2	2	8
1	Erlotinib	SR	0.99492	0.00116863	2.49411	1.75405	0.0188	57.4441	905965	2	2	8
1	Erlotinib	HCC1187	0.996021	0.000906308	2.7602	0.835817	0.0026	64.5575	749711	2	2	8
1	Erlotinib	BL-41	0.86875	0.0143107	2.35913	1.83167	0.5118	5.38233	910706	2	2	8
1	Erlotinib	HL-60	0.996049	0.000903339	2.83694	1.31083	0.0038	64.5575	905938	2	2	8
1	Erlotinib	EVSA-T	0.99489	0.00117775	2.66868	1.50432	0.0256	57.385	906862	2	2	8
1	Erlotinib	TE-441-T	0.940415	0.00994486	3.16096	2.08414	0.1134	1.27411	924248	2	2	8
1	Erlotinib	EW-11	0.910998	0.0116736	2.70397	1.79317	0.273	9.89298	684062	2	2	8
1	Erlotinib	KP-N-YS	0.956623	0.00807301	3.07524	1.68896	0.0162	18.9549	946363	2	2	8
1	Erlotinib	LU-165	0.994216	0.00136467	3.05709	1.9296	0.0048	41.659	753589	2	2	8
1	Erlotinib	SUP-T1	0.991978	0.00226711	2.81117	1.07649	0.0056	32.2974	909743	2	2	8
1	Erlotinib	NCI-H1092	0.972699	0.00606209	3.12515	1.56911	0.017	13.26	687997	2	2	8
1	Erlotinib	DJM-1	0.854541	0.0149874	1.62735	1.6361	0.6942	-3.30997	906841	2	2	8
1	Erlotinib	TE-12	0.502483	0.0202315	-1.26234	0.176968	0.9894	-7.08182	946356	2	2	8
1	Erlotinib	J-RT3-T3-5	0.974841	0.0052752	2.70404	2.03924	0.1638	10.163	907391	2	2	8
1	Erlotinib	SKM-1	0.953462	0.00863322	3.15111	2.01324	0.101	16.4025	909722	2	2	8
1	Erlotinib	HOP-62	0.921931	0.0134332	3.10149	1.98897	0.1806	-27.7225	905972	2	2	8
1	Erlotinib	no-11	0.868677	0.0170932	2.49156	1.83794	0.4282	-7.85106	908450	2	2	8
1	Erlotinib	NCI-H2126	0.988773	0.0033281	2.85365	1.46936	0.0264	33.4705	687814	2	2	8
1	Erlotinib	LC-1F	0.655877	0.0210393	-0.378208	0.384374	0.9658	-1.20667	907785	2	2	8
1	Erlotinib	HCC2998	0.971186	0.00699289	3.13775	1.99451	0.017	-0.813748	905971	2	2	8
1	Erlotinib	GA-10	0.651179	0.0204811	-0.631145	0.0639191	1	-6.89405	1303896	2	2	8
1	Erlotinib	KP-N-YN	0.748491	0.0187692	1.74682	1.67278	0.7626	-1.36703	907314	2	2	8
1	Erlotinib	NCI-H2227	0.977748	0.00603062	2.76614	1.88648	0.0264	14.3765	688018	2	2	8
1	Erlotinib	MZ7-mel	0.95134	0.00996197	2.98724	1.59414	0.0156	8.3705	753596	2	2	8
1	Erlotinib	VAL	0.987636	0.00295929	2.3309	1.66286	0.1154	13.1496	1331048	2	2	8
1	Erlotinib	NCI-H345	0.996049	0.00084817	2.42447	0.852437	0.005	64.5575	688021	2	2	8
1	Erlotinib	GR-ST	0.996036	0.000845599	2.8231	1.11562	0.0036	64.5575	906877	2	2	8
1	Erlotinib	NKM-1	0.987214	0.00371423	2.89974	1.35264	0.0078	28.1765	908448	2	2	8
1	Erlotinib	RL95-2	0.847318	0.0421178	1.26067	1.53939	0.7478	-12.1609	930082	2	2	8
1	Erlotinib	KNS-81-FD	0.909454	0.0210098	2.8404	1.88492	0.2458	-8.62227	924188	2	2	8
1	Erlotinib	GT3TKB	0.985127	0.00447097	3.14781	1.68099	0.0082	26.0006	907041	2	2	8
1	Erlotinib	ES-2	0.994423	0.00140438	2.44358	1.27154	0.0332	55.8888	1240128	2	2	8
1	Erlotinib	TUR	0.974484	0.0058788	3.05805	1.70052	0.0168	16.7421	909773	2	2	8
1	Erlotinib	NCI-H524	0.983092	0.00438412	3.07755	2.09184	0.042	13.4834	908483	2	2	8
1	Erlotinib	GRANTA-519	0.98789	0.00366263	3.42604	1.78641	0.0074	37.0012	1303897	2	2	8
1	Erlotinib	Toledo	0.992009	0.00204528	2.85211	2.39955	0.0256	31.995	1331046	2	2	8
1	Erlotinib	NCI-H220	0.991008	0.00259161	2.87974	1.12082	0.0062	23.9428	1330974	2	2	8
1	Erlotinib	NCI-H2081	0.992691	0.0020628	2.97465	1.31061	0.0058	38.9362	908480	2	2	8
1	Erlotinib	Becker	0.842034	0.0156652	2.52505	1.96885	0.493	-11.3111	906746	2	2	8
1	Erlotinib	NCI-H226	0.956783	0.00799538	2.96901	2.03733	0.1042	10.8443	905941	2	2	8
1	Erlotinib	SK-ES-1	0.961364	0.00711745	2.16793	1.795	0.2934	37.7176	684072	2	2	8
1	Erlotinib	HC-1	0.915836	0.011697	2.30426	1.87782	0.4236	3.46003	907044	2	2	8
1	Erlotinib	NB17	0.868054	0.012781	0.194466	0.0825933	0.997	-2.59664	949175	2	2	8
1	Erlotinib	SCH	0.996072	0.000886698	2.52372	0.758715	0.0038	64.5575	909711	2	2	8
1	Erlotinib	MZ2-MEL	0.994559	0.00136163	3.22867	1.60769	0.0044	44.0483	971777	2	2	8
1	Erlotinib	KALS-1	0.900608	0.0131844	3.10118	2.20636	0.1736	1.00839	907271	2	2	8
1	Erlotinib	L-428	0.994583	0.00134124	2.98962	1.77372	0.0064	46.8966	907322	2	2	8
1	Erlotinib	Farage	0.978728	0.00468106	2.71137	1.77594	0.1094	12.3622	1297449	2	2	8
1	Erlotinib	JVM-3	0.991983	0.00218173	2.83309	1.23301	0.0068	35.8158	907270	2	2	8
1	Erlotinib	RKO	0.839487	0.0547493	0.925668	1.56148	0.687	-23.9036	909698	2	2	8
1	Erlotinib	U-698-M	0.845369	0.0160884	2.5688	1.88244	0.4756	1.51855	909777	2	2	8
1	Erlotinib	LC4-1	0.995742	0.00097278	2.83906	1.2534	0.0032	59.4547	907787	2	2	8
1	Erlotinib	SK-N-DZ	0.958607	0.00742471	2.86209	2.19407	0.177	7.64911	688086	2	2	8
1	Erlotinib	NCI-H1694	0.996132	0.000847252	2.70201	1.23491	0.0036	64.5575	688006	2	2	8
1	Erlotinib	YT	0.987684	0.00361657	2.58763	1.07691	0.0102	37.4095	946358	2	2	8
1	Erlotinib	COLO-800	0.996062	0.000902168	2.65059	1.16295	0.0032	64.5575	906813	2	2	8
1	Erlotinib	HT	0.995488	0.00105897	2.61094	0.914142	0.005	56.0379	907063	2	2	8
1	Erlotinib	COR-L95	0.98499	0.00394073	3.17198	1.44605	0.0112	16.4077	1297439	2	2	8
1	Erlotinib	SW954	0.886552	0.0132195	2.18946	1.76309	0.506	2.4817	924247	2	2	8
1	Erlotinib	SNU-C1	0.897966	0.0126626	2.60878	1.91357	0.393	6.87641	910905	2	2	8
1	Erlotinib	OS-RC-2	0.669927	0.022319	-0.513862	1.61535	0.9102	-13.7849	909250	2	2	8
1	Erlotinib	TC-71	0.995691	0.000913705	3.07842	1.53166	0.0092	59.9933	1240221	2	2	8
1	Erlotinib	EKVX	0.638186	0.0215067	-0.988164	0.509883	0.9764	-6.99214	905970	2	2	8
1	Erlotinib	MFH-ino	0.990272	0.00286984	2.98124	1.41154	0.0088	13.8628	925343	2	2	8
1	Erlotinib	LAMA-84	0.971916	0.00556612	2.13697	1.7897	0.289	22.8897	907783	2	2	8
1	Erlotinib	COLO-829	0.877067	0.0161348	2.66667	1.97072	0.3398	-15.3151	687448	2	2	8
1	Erlotinib	MY-M12	0.949901	0.0084406	2.374	1.87405	0.3264	7.31806	1330960	2	2	8
1	Erlotinib	CHP-126	0.990142	0.00287569	2.74346	1.1875	0.008	15.5839	910567	2	2	8
1	Erlotinib	ES7	0.995758	0.000997243	3.70571	2.22711	0.0036	47.1354	684059	2	2	8
1	Erlotinib	MONO-MAC-6	0.986713	0.00340405	2.28053	1.60002	0.1286	44.4825	908148	2	2	8
1	Erlotinib	TK10	0.750066	0.0421108	-0.154785	0.33773	0.984	-11.6041	905980	2	2	8
1	Erlotinib	RH-1	0.965628	0.00680386	3.06291	1.39844	0.0208	10.2761	971773	2	2	8
1	Erlotinib	GCIY	0.712526	0.0210507	1.08895	1.4282	0.86	-7.12365	906869	2	2	8
1	Erlotinib	KASUMI-1	0.968406	0.00691832	2.92436	1.63001	0.017	25.1701	907275	2	2	8
1	Erlotinib	RS4-11	0.970742	0.00634592	2.66735	1.85676	0.1356	28.4427	909703	2	2	8
1	Erlotinib	Hs-445	0.964317	0.00648191	2.07127	1.72411	0.3222	14.5643	1322218	2	2	8
1	Erlotinib	NCI-H719	0.976525	0.00510695	2.55278	1.82342	0.1678	1.65596	924242	2	2	8
1	Erlotinib	MC116	0.959493	0.00709539	1.56425	1.65291	0.444	41.157	907799	2	2	8
1	Erlotinib	TE-15	0.864604	0.01347	1.89207	1.75481	0.6202	-0.341976	753614	2	2	8
1	Erlotinib	SF539	0.923342	0.0154846	2.31455	1.94765	0.2522	2.19638	905984	2	2	8
1	Erlotinib	ES4	0.836391	0.015297	2.0626	1.81469	0.6344	8.78075	949156	2	2	8
1	Erlotinib	HCC1599	0.98089	0.00446802	2.59682	1.61507	0.096	13.1327	749713	2	2	8
1	Erlotinib	ONS-76	0.989974	0.00378148	1.91917	1.39844	0.083	20.6074	909248	2	2	8
1	Erlotinib	SK-NEP-1	0.985898	0.0034288	2.21333	1.68151	0.1726	48.9339	909730	2	2	8
1	Erlotinib	MZ1-PC	0.882561	0.0132758	1.9962	1.79913	0.5756	-1.86234	753595	2	2	8
1	Erlotinib	DMS-153	0.996077	0.000851798	2.83811	1.1936	0.0032	64.5575	687984	2	2	8
1	Erlotinib	LB373-MEL-D	0.877263	0.0147172	2.69109	1.95716	0.3668	-1.41159	753581	2	2	8
1	Erlotinib	NCI-H2196	0.991084	0.00247627	2.82379	1.55706	0.009	25.72	908481	2	2	8
1	Erlotinib	D-263MG	0.912987	0.0170517	2.85289	1.97757	0.202	-11.9888	946368	2	2	8
1	Erlotinib	NAMALWA	0.991691	0.00214926	2.585	1.80399	0.0648	51.7974	908159	2	2	8
1	Erlotinib	no-10	0.926312	0.0140935	3.21556	1.64269	0.027	-10.0422	908452	2	2	8
1	Erlotinib	NOS-1	0.79322	0.0172925	1.11214	1.37772	0.8388	0.345375	925345	2	2	8
1	Erlotinib	NCI-H1581	0.980854	0.00430993	2.40265	1.60138	0.1474	14.9583	908471	2	2	8
1	Erlotinib	HDLM-2	0.958466	0.00779972	2.92842	2.10781	0.1386	20.2904	924110	2	2	8
1	Erlotinib	WIL2-NS	0.903368	0.01437	2.79315	1.85804	0.2938	-6.11029	1331049	2	2	8
1	Erlotinib	CTB-1	0.927543	0.0101146	2.29122	1.8444	0.4224	7.50879	949088	2	2	8
1	Erlotinib	A253	0.791689	0.0170317	1.2028	1.46012	0.8098	2.12331	906794	2	2	8
1	Erlotinib	CP66-MEL	0.833059	0.0172303	2.26712	1.89522	0.5444	-8.18249	753546	2	2	8
1	Erlotinib	KE-37	0.993333	0.00158733	2.59268	2.00281	0.0334	23.8754	907277	2	2	8
1	Erlotinib	TE-9	0.641191	0.0208164	-0.943263	1.39263	0.925	-14.4283	946353	2	2	8
1	Erlotinib	JVM-2	0.987611	0.00314219	2.26496	1.67266	0.1172	49.8396	907269	2	2	8
1	Erlotinib	BE2-M17	0.931427	0.0103133	2.8381	1.93403	0.2354	18.3998	753616	2	2	8
1	Erlotinib	NCI-H446	0.945894	0.00971131	3.07137	1.97111	0.0696	5.33635	688023	2	2	8
1	Erlotinib	DMS-79	0.855343	0.0159316	2.84817	1.95539	0.3576	3.84913	753551	2	2	8
1	Erlotinib	LC-2-ad	0.840041	0.0156031	1.87531	1.84099	0.646	0.325695	907786	2	2	8
1	Erlotinib	NCI-H2171	0.995521	0.00108116	3.02489	1.50464	0.0052	56.6483	688015	2	2	8
1	Erlotinib	MS-1	0.965777	0.00640113	2.27906	1.90712	0.2598	23.1084	753594	2	2	8
1	Erlotinib	KGN	0.917366	0.0115157	2.3033	1.73007	0.3834	-0.642198	924186	2	2	8
1	Erlotinib	OCI-LY-19	0.952457	0.00778602	1.5664	1.74797	0.5214	11.3245	1330984	2	2	8
1	Erlotinib	OCUB-M	0.995522	0.00106638	2.78734	1.26947	0.0036	57.8086	909256	2	2	8
1	Erlotinib	COLO-668	0.974101	0.00538582	1.77805	1.59724	0.3026	11.4778	910692	2	2	8
1	Erlotinib	ME-1	0.964939	0.00714194	2.82654	1.82007	0.0394	16.9658	1330942	2	2	8
1	Erlotinib	SIG-M5	0.994038	0.00215803	2.25311	1.81906	0.0476	30.8545	909715	2	2	8
1	Erlotinib	NB5	0.842453	0.0160823	2.2554	1.84366	0.5826	6.55219	949176	2	2	8
1	Erlotinib	NCI-H69	0.9947	0.00128255	2.83071	1.85022	0.0336	56.6587	688027	2	2	8
1	Erlotinib	Raji	0.995422	0.00109625	2.95759	1.73756	0.0054	56.0729	909262	2	2	8
1	Erlotinib	NCI-H510A	0.986145	0.00316236	2.63154	1.65954	0.081	22.6238	753605	2	2	8
1	Erlotinib	KU812	0.98806	0.00329091	2.76975	1.72102	0.0234	25.1976	907311	2	2	8
1	Erlotinib	CTV-1	0.992052	0.00225366	2.88575	1.20807	0.0062	33.1639	753548	2	2	8
1	Erlotinib	D-283MED	0.965917	0.00677851	3.03595	2.00791	0.1216	16.7443	906834	2	2	8
1	Erlotinib	WSU-DLCL2	0.990002	0.00257157	3.5171	2.06052	0.0086	21.6324	1331050	2	2	8
1	Erlotinib	DU-4475	0.961309	0.00810817	3.25857	1.7837	0.022	15.8974	906844	2	2	8
1	Erlotinib	LB647-SCLC	0.898823	0.0169278	2.14474	1.93652	0.5014	-11.5394	753582	2	2	8
1	Erlotinib	ES6	0.733605	0.021567	0.853535	1.78211	0.8236	-20.3147	949157	2	2	8
1	Erlotinib	NCI-SNU-5	0.994368	0.00128588	2.79594	1.85635	0.021	46.7697	908445	2	2	8
1	Erlotinib	KINGS-1	0.993697	0.00161362	2.94524	1.59561	0.0064	30.0809	907279	2	2	8
1	Erlotinib	NTERA-S-cl-D1	0.929913	0.0106841	3.1617	1.60392	0.0312	3.65878	908454	2	2	8
1	Erlotinib	BC-1	0.995561	0.00104144	2.38256	0.510494	0.0046	57.7468	910919	2	2	8
1	Erlotinib	NB14	0.996071	0.00085158	3.23513	2.00026	0.005	64.5575	949178	2	2	8
1	Erlotinib	PSN1	0.977287	0.00613972	3.09269	2.03533	0.0106	19.7464	910546	2	2	8
1	Erlotinib	HT-144	0.878324	0.0143109	2.64558	1.99865	0.3868	-0.878351	907067	2	2	8
1	Erlotinib	MOLT-4	0.978322	0.00478855	2.73938	1.66535	0.088	15.9828	905958	2	2	8
1	Erlotinib	LB771-HNC	0.779762	0.0177231	2.23891	1.88053	0.5744	-8.15378	753583	2	2	8
1	Erlotinib	KM12	0.938571	0.0142012	2.18419	1.91083	0.283	-1.78427	905989	2	2	8
1	Erlotinib	ACN	0.97786	0.00505236	2.77891	1.86385	0.0994	-0.472816	906803	2	2	8
1	Erlotinib	PF-382	0.937528	0.00981391	2.73323	1.92525	0.2678	12.6637	909260	2	2	8
1	Erlotinib	SF268	0.897989	0.0134102	3.26341	1.70602	0.0314	1.55714	905986	2	2	8
1	Erlotinib	SUP-HD1	0.988461	0.00292206	3.28112	1.81602	0.0126	13.4493	1331039	2	2	8
1	Erlotinib	IST-MES1	0.963409	0.00778528	2.78709	1.72827	0.0636	10.834	907173	2	2	8
1	Erlotinib	SK-MEL-2	0.991602	0.00239338	3.2581	1.56363	0.0082	36.9623	905955	2	2	8
1	Erlotinib	EW-1	0.989496	0.00297274	2.49072	1.63049	0.0772	50.4088	949163	2	2	8
1	Erlotinib	NCI-H847	0.989791	0.00272584	2.64445	1.75789	0.0552	38.0355	1240193	2	2	8
1	Erlotinib	NCI-H716	0.992919	0.00186358	3.02238	1.32483	0.0078	37.1511	908458	2	2	8
1	Erlotinib	JM1	0.969837	0.00640223	2.56524	1.74732	0.1614	11.294	1327768	2	2	8
1	Erlotinib	NCI-H1355	0.756249	0.0184834	1.87219	1.7163	0.7252	-5.77055	724866	2	2	8
1	Erlotinib	NCI-H1385	0.894448	0.0127788	2.55843	1.87368	0.4036	3.28875	1330965	2	2	8
1	Erlotinib	TE-5	0.760913	0.0186365	1.60844	1.62623	0.778	1.39312	735784	2	2	8
1	Erlotinib	HCC2157	0.875631	0.0142161	1.939	1.81732	0.6212	3.47513	749715	2	2	8
1	Erlotinib	Calu-6	0.98587	0.00403509	3.28744	1.794	0.0076	9.88873	724859	2	2	8
1	Erlotinib	GI-1	0.827961	0.0967559	1.03241	1.94074	0.4694	-21.6332	906871	2	2	8
1	Erlotinib	MKL-1-subclone-2	0.994813	0.00131152	3.16197	1.24876	0.0052	47.5531	1333014	2	2	8
1	Erlotinib	TK	0.985399	0.00376709	2.53042	1.6976	0.1	-3.56371	1331045	2	2	8
1	Erlotinib	QIMR-WIL	0.969462	0.00640422	2.52038	1.74821	0.1614	18.6051	910545	2	2	8
1	Erlotinib	IMR-5	0.991023	0.00261291	2.81104	1.40742	0.01	29.148	907170	2	2	8
1	Erlotinib	NCI-H187	0.984283	0.00409758	2.90061	2.17118	0.0386	15.6237	688007	2	2	8
1	Erlotinib	RPMI-6666	0.952526	0.0079712	2.24968	1.82894	0.3284	6.80493	909701	2	2	8
1	Erlotinib	MOLM-13	0.948323	0.00798471	1.17746	1.31656	0.5762	39.5754	1330947	2	2	8
1	Erlotinib	NCI-H1869	0.787926	0.0174812	1.63165	1.66554	0.7518	1.25141	1240183	2	2	8
1	Erlotinib	HH	0.996046	0.000879709	2.9984	1.36831	0.0038	64.5575	907056	2	2	8
1	Erlotinib	MDST8	0.996088	0.000866212	2.6733	1.09091	0.0042	64.5575	1240173	2	2	8
1	Erlotinib	MN-60	0.994006	0.00151359	2.58559	0.907691	0.0058	38.1	908143	2	2	8
1	Erlotinib	EB2	0.961954	0.00768631	2.93934	1.67576	0.0756	8.45229	906846	2	2	8
1	Erlotinib	HD-MY-Z	0.935012	0.0102582	2.6639	1.85485	0.2828	5.99115	907050	2	2	8
1	Erlotinib	SU-DHL-1	0.945411	0.00963582	3.37453	1.91554	0.0318	7.36707	909742	2	2	8
1	Erlotinib	MPP-89	0.804813	0.0184932	1.84935	1.746	0.6938	-19.0987	908150	2	2	8
1	Erlotinib	REH	0.949134	0.00916049	3.56954	1.82454	0.0296	8.89234	909696	2	2	8
1	Erlotinib	ECC4	0.885824	0.0141566	2.96297	1.96549	0.2686	5.20799	906850	2	2	8
1	Erlotinib	GI-ME-N	0.881205	0.0168901	2.38944	1.86912	0.4634	-8.54474	906872	2	2	8
1	Erlotinib	KM-H2	0.966999	0.00664878	2.66124	1.74982	0.1276	8.25942	909976	2	2	8
1	Erlotinib	MMAC-SF	0.92936	0.0238729	2.70094	1.86067	0.233	-7.7958	925339	2	2	8
1	Erlotinib	DEL	0.996042	0.000860428	2.97455	1.93836	0.003	64.5575	906836	2	2	8
1	Erlotinib	COR-L88	0.941299	0.00946945	3.17664	2.07793	0.1002	5.96984	906808	2	2	8
1	Erlotinib	LB2518-MEL	0.843423	0.0168178	2.42518	1.96619	0.5104	-4.65922	753579	2	2	8
1	Erlotinib	P32-ISH	0.956402	0.00766316	2.24493	1.82431	0.3168	10.791	1330987	2	2	8
1	Erlotinib	NMC-G1	0.747858	0.0214015	1.44439	2.11719	0.6666	-20.2246	908449	2	2	8
1	Erlotinib	LP-1	0.994566	0.00130477	2.81248	2.0149	0.0332	56.4084	907791	2	2	8
1	Erlotinib	LU-134-A	0.99562	0.000992471	2.97999	2.20198	0.0036	57.6909	753588	2	2	8
1	Erlotinib	KELLY	0.995446	0.0010623	2.52755	0.820376	0.0052	55.1185	753618	2	2	8
1	Erlotinib	SIMA	0.969041	0.00661611	3.1853	1.80178	0.017	15.3659	753620	2	2	8
1	Erlotinib	D-336MG	0.741761	0.0865084	0.463233	2.21157	0.583	-22.2452	946369	2	2	8
1	Erlotinib	JJN-3	0.960227	0.00792698	2.98917	1.84133	0.1068	10.0699	1327766	2	2	8
1	Erlotinib	DSH1	0.993234	0.00261259	2.01746	1.6401	0.0558	42.7632	753552	2	2	8
1	Erlotinib	RF-48	0.9806	0.00430401	2.59518	1.69106	0.1126	14.6417	909697	2	2	8
1	Erlotinib	NH-12	0.995224	0.00122464	2.98253	2.15702	0.0038	51.695	908447	2	2	8
1	Erlotinib	SLVL	0.991651	0.00209313	2.35351	1.48694	0.0648	24.9388	1331032	2	2	8
1	Erlotinib	MRK-nu-1	0.98855	0.00306025	2.68989	1.79482	0.047	26.7027	908151	2	2	8
1	Erlotinib	EJM	0.983074	0.00408795	2.63538	1.49291	0.0664	24.0517	1297447	2	2	8
1	Erlotinib	HEL	0.85657	0.0147583	1.75185	1.83196	0.6756	10.3186	907053	2	2	8
1	Erlotinib	COLO-824	0.990235	0.00296649	2.77247	1.0237	0.0076	32.9147	906812	2	2	8
1	Erlotinib	SUP-M2	0.990124	0.00266255	2.56659	1.57782	0.065	50.3601	1331040	2	2	8
1	Erlotinib	NCI-SNU-1	0.859876	0.015274	2.36272	1.86538	0.5116	6.42914	908444	2	2	8
1	Erlotinib	MKL-2	0.977287	0.00547439	2.72714	1.81691	0.1114	5.63947	1333015	2	2	8
1	Erlotinib	WSU-NHL	0.942472	0.00990423	2.89202	1.90112	0.1472	6.53987	909785	2	2	8
1	Erlotinib	KARPAS-299	0.990978	0.00280206	2.75969	0.981992	0.0048	42.6535	907273	2	2	8
1	Erlotinib	TF-1	0.971871	0.00576531	2.6891	2.02941	0.1514	4.51974	1331044	2	2	8
1	Erlotinib	ML-2	0.994981	0.00119791	2.5847	1.58991	0.022	57.8117	908141	2	2	8
1	Erlotinib	P31-FUJ	0.993851	0.00159466	2.78425	1.4558	0.0058	43.4861	909253	2	2	8
1	Erlotinib	RC-K8	0.99094	0.00272948	3.32813	2.03897	0.0062	32.624	1330995	2	2	8
1	Erlotinib	DND-41	0.990023	0.00276775	2.49314	1.06486	0.0072	37.742	1297446	2	2	8
1	Erlotinib	SU-DHL-16	0.990917	0.00226412	2.8949	1.79954	0.0176	24.632	1331034	2	2	8
1	Erlotinib	SJSA-1	0.952536	0.00889463	2.7643	1.73029	0.1106	6.62507	909717	2	2	8
1	Erlotinib	NB6	0.953754	0.00772991	2.54535	1.90539	0.282	13.0479	949173	2	2	8
1	Erlotinib	CPC-N	0.832292	0.0165456	2.5598	1.98252	0.488	-6.65618	753547	2	2	8
1	Erlotinib	Mo-T	0.995362	0.0011365	2.71835	1.05654	0.0066	54.7411	908149	2	2	8
1	Erlotinib	ATN-1	0.920047	0.0120007	3.28674	1.71772	0.0396	4.8355	910687	2	2	8
1	Erlotinib	HSC-39	0.996069	0.000821486	3.00321	2.01407	0.0046	64.5575	1322224	2	2	8
1	Erlotinib	TE-10	0.863893	0.0149124	2.0244	1.79837	0.6218	0.298129	753622	2	2	8
1	Erlotinib	CCRF-CEM	0.966097	0.00669278	2.6802	1.90127	0.1648	7.8026	905952	2	2	8
1	Erlotinib	EW-24	0.681599	0.0232344	-0.384331	0.481594	0.96	-1.0937	949168	2	2	8
1	Erlotinib	KS-1	0.768857	0.0182019	0.87485	1.2726	0.8852	-6.36226	907313	2	2	8
1	Erlotinib	NCI-H720	0.996049	0.000866854	3.11251	1.51894	0.004	64.5575	687600	2	2	8
1	Erlotinib	ES3	0.994902	0.00124458	3.43228	1.89127	0.0092	49.9031	684055	2	2	8
1	Erlotinib	NCI-H1876	0.967224	0.00634818	2.6442	1.89542	0.1792	18.554	1330972	2	2	8
1	Erlotinib	BE-13	0.993821	0.00156371	2.39246	1.4138	0.0524	53.5504	906763	2	2	8
1	Erlotinib	THP-1	0.976427	0.00550359	2.7433	1.22811	0.015	22.5434	909771	2	2	8
1	Erlotinib	NB(TU)1-10	0.986066	0.00367583	2.80976	1.80037	0.0526	38.6738	1240181	2	2	8
1	Erlotinib	SHP-77	0.931362	0.010391	2.96092	1.96208	0.1788	6.13804	724872	2	2	8
1	Erlotinib	A3-KAW	0.92587	0.0101361	1.77582	1.76554	0.5588	0.606425	910935	2	2	8
1	Erlotinib	K-562	0.993568	0.00171896	2.23368	1.73775	0.069	52.4757	905940	2	2	8
1	Erlotinib	C2BBe1	0.889385	0.0137073	2.46044	1.88876	0.4636	-2.01896	910700	2	2	8
1	Erlotinib	ETK-1	0.850898	0.0154488	1.95725	1.86929	0.6602	1.71767	906861	2	2	8
1	Erlotinib	LB996-RCC	0.581563	0.0223019	-1.40596	0.306576	0.9866	-6.48541	753585	2	2	8
1	Erlotinib	P30-OHK	0.980921	0.00466645	3.18323	2.13441	0.0124	21.7522	909252	2	2	8
1	Erlotinib	EoL-1-cell	0.988885	0.00296628	2.51076	1.23887	0.0358	28.2961	906856	2	2	8
1	Erlotinib	KARPAS-231	0.97991	0.0044901	2.39543	1.9295	0.186	35.3415	1327774	2	2	8
1	Erlotinib	IST-MEL1	0.895371	0.0149517	2.71726	1.99755	0.3356	-5.00438	907172	2	2	8
1	Erlotinib	IST-SL1	0.948566	0.00882523	2.95352	1.7878	0.0848	3.42047	753564	2	2	8
1	Erlotinib	MC-CAR	0.983523	0.0038571	2.52134	1.63337	0.0806	15.2417	683665	2	2	8
1	Erlotinib	A388	0.769123	0.0177956	0.0813321	0.468449	0.9678	-9.1804	910697	2	2	8
1	Erlotinib	NCI-H1838	0.895819	0.0128185	2.55003	1.87552	0.3978	6.80078	687807	2	2	8
1	Erlotinib	SU-DHL-6	0.947588	0.00892732	2.07468	1.88103	0.409	0.80431	1331037	2	2	8
1	Erlotinib	DMS-114	0.983444	0.00427626	2.64435	1.14208	0.0088	29.0092	687983	2	2	8
1	Erlotinib	SK-MM-2	0.98575	0.00423236	3.15206	1.2685	0.0076	27.6258	753612	2	2	8
1	Erlotinib	NK-92MI	0.904805	0.012347	2.8735	1.80876	0.251	4.50981	1330981	2	2	8
1	Erlotinib	IST-SL2	0.981036	0.00431177	2.75072	1.9879	0.099	27.1089	753565	2	2	8
1	Erlotinib	LB831-BLC	0.914887	0.0193465	2.40082	1.81371	0.3664	0.864687	753584	2	2	8
1	Erlotinib	NCI-H1836	0.942182	0.00965933	2.65886	1.77191	0.235	4.58606	1240182	2	2	8
1	Erlotinib	NCI-H526	0.953379	0.00836995	2.86706	2.05277	0.131	0.205809	688025	2	2	8
1	Erlotinib	AM-38	0.996051	0.000833368	2.44693	0.970791	0.005	64.5575	910933	2	2	8
1	Erlotinib	TGBC1TKB	0.996012	0.000886636	2.96388	1.77319	0.0054	64.5575	909769	2	2	8
1	Erlotinib	OCI-AML3	0.99473	0.00121561	3.20802	2.72007	0.0058	45.4438	1290455	2	2	8
1	Erlotinib	ES5	0.996106	0.000832921	2.94787	1.04162	0.004	64.5575	684057	2	2	8
1	Erlotinib	CGTH-W-1	0.992502	0.00188126	2.69078	1.55862	0.035	40.6784	910568	2	2	8
1	Erlotinib	EW-13	0.996078	0.000830972	2.62588	0.796469	0.0038	64.5575	949166	2	2	8
1	Erlotinib	ECC12	0.5485	0.0229131	-1.23631	0.295945	0.9812	-10.8117	906849	2	2	8
1	Erlotinib	NCI-H2135	0.992372	0.00197291	2.80388	2.03534	0.02	34.9399	1298352	2	2	8
1	Erlotinib	VA-ES-BJ	0.992099	0.00215056	3.09919	1.8459	0.0082	23.963	688121	2	2	8
1	Erlotinib	SCC-15	0.978805	0.00529415	2.73687	1.44158	0.042	21.7081	910911	2	2	8
1	Erlotinib	L-540	0.983769	0.00411444	2.51359	1.76241	0.0768	13.6349	907323	2	2	8
1	Erlotinib	NCI-H1395	0.995637	0.000999829	2.2695	0.594209	0.0038	57.6331	684681	2	2	8
1	Erlotinib	D-392MG	0.882677	0.0138713	2.17147	1.82576	0.5098	-4.07374	946370	2	2	8
1	Erlotinib	HAL-01	0.959714	0.00757367	2.69068	1.9154	0.1702	3.41098	949153	2	2	8
1	Erlotinib	8-MG-BA	0.992731	0.00169861	2.32999	1.46976	0.0534	33.8293	687562	2	2	8
1	Erlotinib	Tera-1	0.986397	0.00338296	2.59189	1.58724	0.0578	22.8981	1331043	2	2	8
1	Erlotinib	KOPN-8	0.975575	0.00565101	2.54575	1.74096	0.1446	16.8766	1330933	2	2	8
1	Erlotinib	KG-1	0.99437	0.00142128	2.53723	1.56972	0.0398	55.9899	907278	2	2	8
1	Erlotinib	NEC8	0.994532	0.00133778	2.47069	1.55716	0.0324	56.2586	910942	2	2	8
1	Erlotinib	IM-9	0.996056	0.000882744	2.97874	1.14718	0.0052	64.5575	753563	2	2	8
1	Erlotinib	KURAMOCHI	0.911027	0.0119982	2.77299	1.81492	0.2692	3.86666	909975	2	2	8
1	Erlotinib	SU-DHL-8	0.889393	0.0160021	2.60335	2.00157	0.3794	0.666062	1331038	2	2	8
1	Erlotinib	LOXIMVI	0.993787	0.00155004	2.638	1.184	0.006	37.9915	905974	2	2	8
1	Erlotinib	EW-12	0.996051	0.000834459	2.54931	1.34718	0.0054	64.5575	949162	2	2	8
1	Erlotinib	LXF-289	0.951503	0.0102605	3.06574	1.93496	0.1106	-13.2509	753592	2	2	8
1	Erlotinib	OCI-M1	0.995688	0.000994776	3.37107	2.35083	0.0058	58.5939	1330985	2	2	8
1	Erlotinib	COLO-684	0.993087	0.00202754	2.65528	0.882437	0.0072	39.9669	910691	2	2	8
1	Erlotinib	LAN-6	0.981919	0.0043865	2.80682	1.97983	0.0538	16.1309	949170	2	2	8
1	Erlotinib	SUP-B15	0.996036	0.000861776	2.82319	1.21303	0.005	64.5575	1247871	2	2	8
1	Erlotinib	RL	0.996121	0.000856286	3.4049	1.58144	0.0034	64.5575	910861	2	2	8
1	Erlotinib	ST486	0.988607	0.0030818	2.25027	1.49998	0.1014	50.3091	910906	2	2	8
1	Erlotinib	NCI-H64	0.995502	0.00109819	2.73956	1.13244	0.005	56.458	688026	2	2	8
1	Erlotinib	BV-173	0.920246	0.0106704	2.17125	1.77837	0.4742	6.30736	910710	2	2	8
1	Erlotinib	PL-21	0.995459	0.00106478	2.4635	1.10972	0.0044	56.6042	1330991	2	2	8
1	Erlotinib	LB1047-RCC	0.884038	0.0130765	1.62382	1.66147	0.6714	2.86508	753577	2	2	8
1	Erlotinib	NCI-H1963	0.993447	0.00253528	3.46339	1.92469	0.0072	35.8411	688010	2	2	8
1	Erlotinib	L-363	0.995349	0.00117146	3.36259	1.44232	0.0038	54.9399	924239	2	2	8
1	Erlotinib	ES1	0.663842	0.0201024	-1.57172	0.267124	0.9922	-18.3119	949158	2	2	8
1	Erlotinib	LS-123	0.825154	0.0163731	2.15621	1.72514	0.6068	-1.74235	907792	2	2	8
1	Erlotinib	SW962	0.794119	0.0184606	1.93011	1.78884	0.6808	-4.24672	909758	2	2	8
1	Erlotinib	EW-16	0.922988	0.0106546	1.5183	1.62169	0.6414	-5.07225	949165	2	2	8
1	Erlotinib	LNCaP-Clone-FGC	0.985639	0.00387052	2.72749	1.39436	0.008	29.8176	907788	2	2	8
1	Erlotinib	MEC-1	0.990202	0.00229682	2.47312	1.72055	0.0724	32.6087	1330943	2	2	8
1	Erlotinib	HA7-RCC	0.966704	0.00839646	3.16494	1.66564	0.0136	18.855	753558	2	2	8
1	Erlotinib	D-542MG	0.811373	0.0242873	2.10768	2.11105	0.5418	-13.221	753549	2	2	8
1	Erlotinib	TE-6	0.762793	0.0176974	1.35704	1.61499	0.7918	6.29881	946355	2	2	8
1	Erlotinib	A4-Fuk	0.976257	0.00507209	2.46129	1.94394	0.1568	9.18659	910934	2	2	8
1	Erlotinib	K5	0.993762	0.00147835	2.48327	0.85365	0.0054	36.0598	924238	2	2	8
1	Erlotinib	EW-3	0.996019	0.000902617	2.94006	1.24314	0.0036	64.5575	949161	2	2	8
1	Erlotinib	COLO-320-HSR	0.994659	0.00128725	2.33947	1.18921	0.0316	56.6879	910569	2	2	8
1	Erlotinib	TE-8	0.842594	0.015877	2.32047	1.92514	0.5208	-0.972165	753623	2	2	8
1	Erlotinib	MHH-PREB-1	0.996076	0.00082982	3.01125	1.46439	0.0056	64.5575	908136	2	2	8
1	Erlotinib	VCaP	0.969089	0.00647475	2.95866	1.28737	0.0154	12.0698	1299075	2	2	8
1	Erlotinib	BB30-HNC	0.594807	0.01807	-0.910475	0.104259	0.9962	-0.00266621	753531	2	2	8
1	Erlotinib	DOHH-2	0.904975	0.0122076	2.56183	1.93396	0.3814	6.1515	906842	2	2	8
1	Erlotinib	Sci-1	0.960812	0.00659697	1.75991	1.70863	0.4376	6.77279	1331031	2	2	8
1	Erlotinib	EHEB	0.986504	0.00403443	2.63303	1.51597	0.034	32.5694	906854	2	2	8
1	Erlotinib	OCI-AML2	0.994356	0.00139884	2.37914	1.40772	0.0434	55.5971	910947	2	2	8
1	Erlotinib	ROS-50	0.992084	0.00198723	2.49823	1.4247	0.016	29.3135	1331025	2	2	8
1	Erlotinib	697	0.92932	0.00946104	0.611922	0.960134	0.864	18.2516	906800	2	2	8
1	Erlotinib	D-502MG	0.748382	0.0188695	1.8237	1.70472	0.7504	-0.0295255	946373	2	2	8
1	Erlotinib	L-1236	0.984303	0.00455005	2.58015	1.45114	0.048	25.0051	1330935	2	2	8
1	Erlotinib	OMC-1	0.996138	0.000832987	3.02596	1.87508	0.0032	64.5575	949154	2	2	8
1	Erlotinib	LB2241-RCC	0.719411	0.0190528	1.18494	1.47307	0.841	0.0901689	753578	2	2	8
1	Erlotinib	BC-3	0.991355	0.00219376	2.68644	1.52672	0.0364	39.6799	910918	2	2	8
1	Erlotinib	SK-MEL-1	0.930688	0.0104581	2.78409	1.83631	0.2352	7.02454	909723	2	2	8
1	Erlotinib	MOLP-8	0.996043	0.000886918	2.5492	1.66871	0.0042	64.5575	1330950	2	2	8
1	Erlotinib	SK-UT-1	0.771812	0.0179602	2.12391	2.25037	0.5104	-14.2484	909732	2	2	8
1	Erlotinib	BB49-HNC	0.954034	0.00925192	2.65758	1.1895	0.012	22.7122	753532	2	2	8
1	Erlotinib	ALL-SIL	0.956676	0.00760596	2.19224	1.77776	0.3278	1.02044	1295740	2	2	8
1	Erlotinib	ARH-77	0.9624	0.00731296	2.92802	1.77322	0.097	13.9683	906765	2	2	8
1	Erlotinib	NCI-H748	0.995366	0.00115171	2.97354	1.61558	0.0088	51.6356	909194	2	2	8
1	Erlotinib	LS-1034	0.984753	0.00409015	2.83276	1.22603	0.0056	23.7833	917486	2	2	8
1	Erlotinib	SH-4	0.99374	0.00143661	2.5872	1.35326	0.0312	41.5186	909713	2	2	8
1	Erlotinib	NB7	0.99606	0.000833414	2.91794	1.42072	0.0046	64.5575	949174	2	2	8
1	Erlotinib	LU-139	0.983109	0.00429014	3.02672	1.63561	0.013	15.111	713878	2	2	8
3	Rapamycin	LU-65	0.911938	0.0122672	1.55091	1.92859	0.2962	5.30976	724863	2	0.1	8
3	Rapamycin	MMAC-SF	0.764441	0.0190531	0.738881	1.78149	0.664	-3.80996	925339	2	0.1	8
3	Rapamycin	BT-474	0.843644	0.0154418	1.09634	1.96723	0.5266	6.4148	946359	2	0.1	8
3	Rapamycin	SK-N-FI	0.906586	0.0121674	1.29715	1.85228	0.3606	6.82665	688087	2	0.1	8
3	Rapamycin	CMK	0.741105	0.0179202	-0.810608	0.956972	0.9258	4.33211	910566	2	0.1	8
3	Rapamycin	HCE-4	0.783294	0.0175802	0.47513	1.73553	0.722	-6.05048	753559	2	0.1	8
3	Rapamycin	BC-3	0.712457	0.0194562	-0.50374	1.49414	0.8652	2.71339	910918	2	0.1	8
3	Rapamycin	SUP-B15	0.528074	0.0232222	-2.9271	0.228717	0.9864	-13.1968	1247871	2	0.1	8
3	Rapamycin	CCRF-CEM	0.562094	0.0212531	-2.41854	0.222326	0.9822	-4.99893	905952	2	0.1	8
3	Rapamycin	SKM-1	0.902684	0.0129166	1.63118	2.02113	0.2668	3.67983	909722	2	0.1	8
3	Rapamycin	QIMR-WIL	0.546971	0.0215918	-2.71456	0.268352	0.9792	-5.45193	910545	2	0.1	8
3	Rapamycin	SW872	0.471174	0.0219162	-3.07115	0.0520807	1	-19.9746	909756	2	0.1	8
3	Rapamycin	MFM-223	0.996046	0.000884288	1.51621	1.72733	0.0038	64.5575	910948	2	0.1	8
3	Rapamycin	MEC-1	0.544886	0.0210966	-2.60444	0.305674	0.9812	-8.19416	1330943	2	0.1	8
3	Rapamycin	MLMA	0.660919	0.0213321	-0.453041	1.64771	0.8488	-6.25583	908142	2	0.1	8
3	Rapamycin	NCI-H1694	0.873254	0.0137805	1.1562	1.92367	0.4824	6.3525	688006	2	0.1	8
3	Rapamycin	SCC-15	0.982705	0.0044653	1.69303	1.37598	0.0108	18.5593	910911	2	0.1	8
3	Rapamycin	OVCAR-4	0.635778	0.0212824	-2.5039	0.88434	0.9696	-5.89512	905990	2	0.1	8
3	Rapamycin	KMOE-2	0.946617	0.00924102	1.62349	1.89028	0.196	14.5607	907280	2	0.1	8
3	Rapamycin	NCI-H747	0.719626	0.021798	0.61415	1.84486	0.7434	-12.8261	908457	2	0.1	8
3	Rapamycin	SNB75	0.573402	0.0212703	-3.04158	0.0602779	1	-20.5785	905982	2	0.1	8
3	Rapamycin	ES1	0.757019	0.0187708	1.42273	1.90241	0.4824	-9.96411	949158	2	0.1	8
3	Rapamycin	MDST8	0.843666	0.0159393	0.901447	1.82737	0.598	4.9909	1240173	2	0.1	8
3	Rapamycin	NCI-H1304	0.792674	0.0162878	-1.01001	0.839622	0.9186	17.3476	753599	2	0.1	8
3	Rapamycin	HUTU-80	0.554333	0.0200835	-2.78514	0.0784809	0.9982	-10.5939	907073	2	0.1	8
3	Rapamycin	JAR	0.906692	0.0117805	0.801561	1.81076	0.507	19.3665	907175	2	0.1	8
3	Rapamycin	NB13	0.540921	0.0210768	-2.4788	0.290494	0.9788	-6.76617	949177	2	0.1	8
3	Rapamycin	JURL-MK1	0.564461	0.0224918	-2.85904	0.167105	0.9906	-15.9623	1327771	2	0.1	8
3	Rapamycin	SF126	0.600641	0.0221366	-2.61185	0.624999	0.9756	-13.3164	909712	2	0.1	8
3	Rapamycin	ES4	0.396112	0.0208142	-3.18034	0.0436047	1	-25.7067	949156	2	0.1	8
3	Rapamycin	TE-11	0.650354	0.0226366	-1.8671	1.31021	0.9278	-10.967	946354	2	0.1	8
3	Rapamycin	NCI-H322M	0.801803	0.0179535	1.11784	1.87979	0.5762	0.762383	905967	2	0.1	8
3	Rapamycin	CTV-1	0.743027	0.0185063	0.615231	1.79154	0.7398	1.46589	753548	2	0.1	8
3	Rapamycin	NU-DUL-1	0.680123	0.020626	-1.19035	0.981687	0.9198	2.54577	1330982	2	0.1	8
3	Rapamycin	P116	0.873647	0.0145779	1.83919	1.92252	0.1666	0.553826	1330986	2	0.1	8
3	Rapamycin	K-562	0.853434	0.0153006	1.28895	1.87786	0.442	2.92931	905940	2	0.1	8
3	Rapamycin	EW-18	0.799618	0.0177754	1.47885	2.01558	0.4648	-2.88092	949164	2	0.1	8
3	Rapamycin	DG-75	0.900535	0.0124519	1.0426	2.04953	0.5114	8.37246	906838	2	0.1	8
3	Rapamycin	KCL-22	0.687832	0.0197211	-1.00461	1.23087	0.9018	2.78682	1330931	2	0.1	8
3	Rapamycin	KMS-12-BM	0.79915	0.0172955	0.767059	1.74164	0.6686	4.3365	907281	2	0.1	8
3	Rapamycin	NCI-H1838	0.882247	0.0134757	1.62906	2.01904	0.286	5.00119	687807	2	0.1	8
3	Rapamycin	NCI-H2135	0.97198	0.00617813	1.43248	1.95805	0.1384	21.2231	1298352	2	0.1	8
3	Rapamycin	Daudi	0.446869	0.0211581	-3.09654	0.106497	0.9966	-14.2434	906831	2	0.1	8
3	Rapamycin	MC116	0.379962	0.0188826	-2.98648	0.108446	0.9964	-7.14165	907799	2	0.1	8
3	Rapamycin	DB	0.727556	0.019837	0.37971	1.7123	0.7826	-0.0730255	906832	2	0.1	8
3	Rapamycin	NOMO-1	0.818421	0.0164774	0.347416	1.62151	0.7168	-3.42878	908451	2	0.1	8
3	Rapamycin	A4-Fuk	0.594058	0.0210581	-2.2218	0.367948	0.9708	-1.98536	910934	2	0.1	8
3	Rapamycin	IA-LM	0.644794	0.0325004	-1.84534	1.39804	0.93	-20.3198	910779	2	0.1	8
3	Rapamycin	D-247MG	0.99444	0.00124786	1.4479	1.25096	0.0054	41.1075	946367	2	0.1	8
3	Rapamycin	LS-411N	0.582122	0.0202674	-2.87256	0.06344	0.9998	-17.8342	907794	2	0.1	8
3	Rapamycin	NCI-H209	0.722019	0.0191665	-0.729713	1.29365	0.8858	0.236037	688013	2	0.1	8
3	Rapamycin	NB7	0.870232	0.0140531	1.4929	1.85881	0.3422	3.40403	949174	2	0.1	8
3	Rapamycin	NCI-H748	0.804977	0.0230671	0.96656	1.90813	0.5168	-13.3794	909194	2	0.1	8
3	Rapamycin	CL-11	0.956798	0.00764732	1.65115	1.9916	0.141	12.4439	1290769	2	0.1	8
3	Rapamycin	RXF393	0.648853	0.0211863	-2.72441	0.531852	0.9898	-21.2658	905978	2	0.1	8
3	Rapamycin	NCI-H211	0.65149	0.0203359	-1.01858	1.34923	0.9022	-4.60618	1240189	2	0.1	8
3	Rapamycin	NCI-H1417	0.935199	0.00964708	1.31883	1.96068	0.3054	21.7727	688001	2	0.1	8
3	Rapamycin	SU-DHL-4	0.439523	0.020917	-3.14612	0.076868	0.999	-13.576	1331035	2	0.1	8
3	Rapamycin	ST486	0.753935	0.0179891	0.658759	1.70149	0.6994	1.25945	910906	2	0.1	8
3	Rapamycin	ACN	0.620505	0.0213801	-2.51137	1.07693	0.9574	-11.667	906803	2	0.1	8
3	Rapamycin	JiyoyeP-2003	0.580423	0.0206892	-2.55797	0.352207	0.9782	-3.52093	907268	2	0.1	8
3	Rapamycin	NB10	0.96806	0.0065556	0.886761	1.70048	0.2358	2.01518	949171	2	0.1	8
3	Rapamycin	UACC-812	0.797395	0.017132	0.584358	1.72426	0.7186	0.180328	910910	2	0.1	8
3	Rapamycin	MSTO-211H	0.9221	0.0103796	1.09005	1.84474	0.362	22.7444	908152	2	0.1	8
3	Rapamycin	IST-SL1	0.816331	0.0167693	0.9245	1.82558	0.5992	1.72411	753564	2	0.1	8
3	Rapamycin	TGBC24TKB	0.544852	0.0200301	-2.64109	0.2084	0.989	-3.92924	910695	2	0.1	8
3	Rapamycin	NBsusSR	0.763858	0.0183345	0.199962	1.62102	0.801	4.39024	925342	2	0.1	8
3	Rapamycin	EW-16	0.586578	0.0204177	-2.83843	0.0815972	0.9986	-16.084	949165	2	0.1	8
3	Rapamycin	SR	0.598169	0.0207772	-2.25459	0.224132	0.9846	-0.277738	905965	2	0.1	8
3	Rapamycin	RH-1	0.965965	0.00720181	1.59746	1.21725	0.0168	16.7558	971773	2	0.1	8
3	Rapamycin	Raji	0.690609	0.0210163	0.0501346	1.75535	0.819	-2.19027	909262	2	0.1	8
3	Rapamycin	BL-70	0.589038	0.0214204	-2.43685	0.614493	0.9696	-7.92081	910707	2	0.1	8
3	Rapamycin	GB-1	0.574189	0.0212279	-3.18134	0.088046	0.9982	-25.3938	687568	2	0.1	8
3	Rapamycin	KELLY	0.881166	0.0134725	0.975027	1.96221	0.5082	5.37913	753618	2	0.1	8
3	Rapamycin	NCI-SNU-5	0.971237	0.00589079	1.11493	1.95135	0.2282	23.2949	908445	2	0.1	8
3	Rapamycin	CESS	0.616416	0.0205766	-2.06142	0.223021	0.9818	-1.02929	910688	2	0.1	8
3	Rapamycin	IMR-5	0.995631	0.000989797	1.40523	0.982711	0.0044	57.91	907170	2	0.1	8
3	Rapamycin	ALL-PO	0.813482	0.0165482	1.12279	1.86917	0.5286	0.947551	910944	2	0.1	8
3	Rapamycin	D-283MED	0.88614	0.0134734	1.18686	1.88354	0.4388	1.86262	906834	2	0.1	8
3	Rapamycin	JSC-1	0.68588	0.0199365	-1.12077	1.15764	0.906	1.64064	1327769	2	0.1	8
3	Rapamycin	EW-22	0.851299	0.0155365	1.31053	1.96968	0.4308	0.974144	949167	2	0.1	8
3	Rapamycin	D-336MG	0.945047	0.00947507	1.97624	2.18632	0.0188	7.65991	946369	2	0.1	8
3	Rapamycin	NCI-H1648	0.737718	0.0201965	0.326376	1.70541	0.7922	-13.3187	687799	2	0.1	8
3	Rapamycin	NCI-H1963	0.84545	0.0152003	0.764185	1.88714	0.6158	2.3206	688010	2	0.1	8
3	Rapamycin	UACC-257	0.932705	0.0105385	1.45002	1.84769	0.206	4.55177	905977	2	0.1	8
3	Rapamycin	OPM-2	0.536915	0.0212379	-2.64296	0.232272	0.9826	-6.03012	909249	2	0.1	8
3	Rapamycin	LC4-1	0.630329	0.0208721	-1.53574	1.31193	0.915	-4.59395	907787	2	0.1	8
3	Rapamycin	GOTO	0.872102	0.0146963	1.09106	1.81483	0.476	4.28851	906875	2	0.1	8
3	Rapamycin	MZ1-PC	0.816546	0.0172835	1.30999	1.91264	0.4528	-7.7732	753595	2	0.1	8
3	Rapamycin	HCC1599	0.657511	0.0220755	-0.699226	1.80169	0.8574	-9.44266	749713	2	0.1	8
3	Rapamycin	AMO-1	0.802772	0.0166234	0.742059	1.7934	0.6774	5.62038	1295741	2	0.1	8
3	Rapamycin	KARPAS-422	0.640087	0.0207689	-1.31841	1.38808	0.9072	-4.54106	907274	2	0.1	8
3	Rapamycin	KM-H2	0.714701	0.0201499	0.454587	1.81056	0.77	-1.00896	909976	2	0.1	8
3	Rapamycin	RKO	0.510508	0.0212934	-3.1105	0.0545695	1	-27.7643	909698	2	0.1	8
3	Rapamycin	PF-382	0.652536	0.0211892	-1.05896	1.42966	0.8786	-2.02691	909260	2	0.1	8
3	Rapamycin	Ramos-2G6-4C10	0.505759	0.0233669	-2.95193	0.1818	0.9914	-12.6394	910401	2	0.1	8
3	Rapamycin	NCI-H69	0.869282	0.0145505	1.07606	1.93577	0.5006	5.35744	688027	2	0.1	8
3	Rapamycin	CAS-1	0.862059	0.0155815	1.3361	1.71076	0.3612	-4.59307	910943	2	0.1	8
3	Rapamycin	OCI-M1	0.887296	0.0137181	1.04185	1.85917	0.4908	8.87321	1330985	2	0.1	8
3	Rapamycin	NCI-H1836	0.884517	0.0138647	0.850269	1.81074	0.5414	1.12312	1240182	2	0.1	8
3	Rapamycin	NAMALWA	0.65174	0.0208344	-1.32387	1.05796	0.9266	-0.795419	908159	2	0.1	8
3	Rapamycin	SBC-1	0.709843	0.0191759	-0.496756	1.53338	0.8624	3.06845	713885	2	0.1	8
3	Rapamycin	J-RT3-T3-5	0.561944	0.0213237	-2.4793	0.229396	0.9874	-2.59481	907391	2	0.1	8
3	Rapamycin	THP-1	0.928567	0.0112444	1.86844	1.74415	0.0434	5.49425	909771	2	0.1	8
3	Rapamycin	NCI-H510A	0.841348	0.0151238	1.04153	1.81761	0.534	4.20806	753605	2	0.1	8
3	Rapamycin	NMC-G1	0.485706	0.0199283	-3.20422	0.0557886	1	-18.275	908449	2	0.1	8
3	Rapamycin	EW-11	0.768959	0.0182971	1.05774	1.87918	0.6176	0.514336	684062	2	0.1	8
3	Rapamycin	NCI-H720	0.646159	0.0209472	-1.84849	0.376455	0.9808	-6.87396	687600	2	0.1	8
3	Rapamycin	SHP-77	0.92371	0.0119618	1.74012	1.95384	0.1432	2.39524	724872	2	0.1	8
3	Rapamycin	RPMI-8866	0.996043	0.000844518	1.29133	0.994362	0.0048	64.5575	910544	2	0.1	8
3	Rapamycin	MEG-01	0.732828	0.0193041	0.583987	1.73278	0.7312	1.92049	908126	2	0.1	8
3	Rapamycin	SCC-3	0.767123	0.018662	0.509422	1.67607	0.7276	3.19792	910930	2	0.1	8
3	Rapamycin	NB4	0.985439	0.00426457	1.6019	1.70964	0.036	31.2733	1323913	2	0.1	8
3	Rapamycin	KNS-42	0.669259	0.0223645	-1.2721	1.76513	0.8852	-10.8512	907282	2	0.1	8
3	Rapamycin	NKM-1	0.817277	0.0170044	0.899481	1.87228	0.5928	4.14046	908448	2	0.1	8
3	Rapamycin	HCC1187	0.786529	0.0179806	0.488363	1.73116	0.7142	1.09429	749711	2	0.1	8
3	Rapamycin	NCI-H1770	0.99496	0.00121077	1.60783	1.23289	0.0058	48.2455	687804	2	0.1	8
3	Rapamycin	MKL-1-subclone-2	0.920626	0.0118202	1.75617	1.93923	0.1698	2.81372	1333014	2	0.1	8
3	Rapamycin	BL-41	0.628853	0.0211749	-1.73034	0.966115	0.9472	-2.87223	910706	2	0.1	8
3	Rapamycin	P31-FUJ	0.987619	0.00340714	1.69984	1.4945	0.0084	36.4475	909253	2	0.1	8
3	Rapamycin	EVSA-T	0.70326	0.0206516	0.00638115	1.54476	0.8404	-5.11909	906862	2	0.1	8
3	Rapamycin	IST-MEL1	0.537747	0.0201736	-3.04964	0.0494377	1	-19.4803	907172	2	0.1	8
3	Rapamycin	NCI-H23	0.991167	0.00266533	1.81846	1.83787	0.01	42.0212	905942	2	0.1	8
3	Rapamycin	COLO-320-HSR	0.793118	0.0177573	0.843958	1.89495	0.662	2.84431	910569	2	0.1	8
3	Rapamycin	TE-441-T	0.855306	0.01571	1.20125	1.8924	0.4646	-0.694545	924248	2	0.1	8
3	Rapamycin	Mo-T	0.994976	0.00123363	1.31053	1.08381	0.0052	50.2055	908149	2	0.1	8
3	Rapamycin	KP-N-YS	0.975907	0.00548212	1.69981	1.59583	0.013	16.2107	946363	2	0.1	8
3	Rapamycin	DJM-1	0.973921	0.00565654	1.20224	1.60755	0.1568	13.5776	906841	2	0.1	8
3	Rapamycin	CW-2	0.873268	0.0143499	1.50262	1.99515	0.3098	0.903232	910554	2	0.1	8
3	Rapamycin	L-1236	0.645596	0.0218327	-1.62867	1.2595	0.9148	-1.15805	1330935	2	0.1	8
3	Rapamycin	NCI-H2126	0.677344	0.0219343	-1.15698	1.88123	0.8626	-14.6303	687814	2	0.1	8
3	Rapamycin	HT	0.663811	0.020239	-1.19282	1.60635	0.8872	-0.0634699	907063	2	0.1	8
3	Rapamycin	SK-PN-DW	0.605583	0.0210462	-2.12721	0.573091	0.9636	-3.30782	909731	2	0.1	8
3	Rapamycin	KY821	0.96559	0.0101774	1.33967	1.80108	0.098	-2.47039	907300	2	0.1	8
3	Rapamycin	NK-92MI	0.78466	0.017232	0.78486	1.79125	0.6654	7.0882	1330981	2	0.1	8
3	Rapamycin	Farage	0.605598	0.0229416	-2.12195	0.505369	0.9598	-9.63883	1297449	2	0.1	8
3	Rapamycin	MHH-PREB-1	0.650192	0.0202737	-1.77783	0.650348	0.954	2.23238	908136	2	0.1	8
3	Rapamycin	MHH-NB-11	0.99214	0.0023399	1.62347	1.59697	0.0064	34.601	908135	2	0.1	8
3	Rapamycin	NB1	0.694524	0.0196874	0.141491	1.74556	0.8028	-0.942074	949179	2	0.1	8
3	Rapamycin	TE-9	0.915531	0.0119109	1.73766	1.94501	0.18	1.61744	946353	2	0.1	8
3	Rapamycin	RL95-2	0.426796	0.0203413	-3.1297	0.0457011	1	-24.119	930082	2	0.1	8
3	Rapamycin	RPMI-8402	0.646489	0.0199806	-1.83201	0.327263	0.9728	1.11335	909702	2	0.1	8
3	Rapamycin	NCI-H187	0.912938	0.011125	0.901136	1.80612	0.435	11.9166	688007	2	0.1	8
3	Rapamycin	NCI-H220	0.755976	0.0189219	0.541364	1.65575	0.7356	-3.0288	1330974	2	0.1	8
3	Rapamycin	MDA-MB-134-VI	0.664356	0.0202215	-1.46897	0.657195	0.9434	-0.234908	908119	2	0.1	8
3	Rapamycin	SU-DHL-8	0.582331	0.0216209	-2.57912	0.635926	0.9686	-9.57043	1331038	2	0.1	8
3	Rapamycin	DMS-153	0.869228	0.0147301	0.93292	1.81896	0.5358	6.31638	687984	2	0.1	8
3	Rapamycin	EW-13	0.902959	0.0125621	1.35897	1.9365	0.3118	4.30812	949166	2	0.1	8
3	Rapamycin	SK-MM-2	0.867363	0.014737	1.08718	1.90211	0.5058	1.94554	753612	2	0.1	8
3	Rapamycin	NB17	0.83153	0.0162639	1.04493	1.98941	0.5566	-0.504619	949175	2	0.1	8
3	Rapamycin	NTERA-S-cl-D1	0.447549	0.020838	-3.17301	0.0562982	0.9996	-15.7267	908454	2	0.1	8
3	Rapamycin	TUR	0.794905	0.0174722	1.40557	1.8757	0.4386	-0.218712	909773	2	0.1	8
3	Rapamycin	ES8	0.81423	0.0169935	0.510413	1.68559	0.702	3.9715	949155	2	0.1	8
3	Rapamycin	EKVX	0.687807	0.0225358	-0.484396	2.26973	0.7804	-12.7879	905970	2	0.1	8
3	Rapamycin	DSH1	0.823039	0.0165029	0.442263	1.75219	0.7092	6.1488	753552	2	0.1	8
3	Rapamycin	U-698-M	0.875276	0.0147783	1.25227	1.92676	0.407	-2.04313	909777	2	0.1	8
3	Rapamycin	A498	0.995322	0.00116214	2.1769	2.14969	0.0042	53.5078	905948	2	0.1	8
3	Rapamycin	A101D	0.535038	0.0220607	-2.93108	0.112107	0.9966	-18.124	910921	2	0.1	8
3	Rapamycin	EB2	0.871354	0.0146424	1.38277	1.91102	0.3882	3.28833	906846	2	0.1	8
3	Rapamycin	SK-N-DZ	0.994412	0.001394	1.11484	1.40174	0.0354	55.6199	688086	2	0.1	8
3	Rapamycin	TE-5	0.700389	0.0211704	-0.194021	2.01699	0.8002	-8.17113	735784	2	0.1	8
3	Rapamycin	LOXIMVI	0.891584	0.0131541	1.19798	1.86639	0.4192	5.34278	905974	2	0.1	8
3	Rapamycin	LB771-HNC	0.754626	0.0202516	1.13133	2.05814	0.4864	-9.69812	753583	2	0.1	8
3	Rapamycin	COR-L95	0.956515	0.00838775	1.32572	2.00757	0.2098	8.01128	1297439	2	0.1	8
3	Rapamycin	SNU-C1	0.587101	0.0207579	-2.37494	0.299687	0.977	-5.6377	910905	2	0.1	8
3	Rapamycin	CHP-126	0.873361	0.0201599	0.90558	2.02645	0.4058	-9.55139	910567	2	0.1	8
3	Rapamycin	NCI-H526	0.858539	0.0132506	-0.0121865	1.62389	0.715	25.0577	688025	2	0.1	8
3	Rapamycin	P32-ISH	0.685564	0.0199851	-0.427811	1.46889	0.8742	0.587077	1330987	2	0.1	8
3	Rapamycin	NCI-H847	0.918498	0.0173387	0.77516	1.77134	0.49	-1.59237	1240193	2	0.1	8
3	Rapamycin	EW-3	0.82942	0.016645	1.03201	1.945	0.5484	2.30155	949161	2	0.1	8
3	Rapamycin	OCUB-M	0.250159	0.0144522	-3.24554	0.0327352	1	-35.0146	909256	2	0.1	8
3	Rapamycin	Calu-6	0.993916	0.00174259	2.06388	1.75849	0.0036	48.3975	724859	2	0.1	8
3	Rapamycin	TE-10	0.526087	0.0221206	-3.06036	0.152299	0.9936	-15.0997	753622	2	0.1	8
3	Rapamycin	JM1	0.772193	0.0188851	0.569654	1.70886	0.7098	-0.52221	1327768	2	0.1	8
3	Rapamycin	MY-M12	0.433812	0.0207115	-3.08728	0.0620323	1	-21.3845	1330960	2	0.1	8
3	Rapamycin	EC-GI-10	0.995536	0.00101626	1.291	1.31008	0.0046	57.0971	753555	2	0.1	8
3	Rapamycin	RS4-11	0.837322	0.0173933	1.32015	1.9465	0.4172	-7.96382	909703	2	0.1	8
3	Rapamycin	SW954	0.76333	0.0201449	1.18458	1.96327	0.5712	-10.9855	924247	2	0.1	8
3	Rapamycin	no-11	0.589142	0.0211959	-2.76115	0.201214	0.9948	-8.91503	908450	2	0.1	8
3	Rapamycin	LU-139	0.739297	0.0186957	0.279307	1.68997	0.786	3.316	713878	2	0.1	8
3	Rapamycin	NCI-SNU-16	0.884398	0.01364	1.10875	1.84889	0.4618	4.48009	908446	2	0.1	8
3	Rapamycin	IST-SL2	0.616374	0.0213562	-1.75574	1.32684	0.9258	-8.31913	753565	2	0.1	8
3	Rapamycin	MV-4-11	0.764876	0.0172908	-0.734498	1.10656	0.9	6.48548	908156	2	0.1	8
3	Rapamycin	ONS-76	0.904039	0.0127906	1.32732	1.82678	0.353	16.2617	909248	2	0.1	8
3	Rapamycin	TK10	0.723633	0.0203029	0.00994337	1.96604	0.7638	-4.75116	905980	2	0.1	8
3	Rapamycin	NCI-H1395	0.836405	0.016203	0.776078	1.79691	0.616	2.65613	684681	2	0.1	8
3	Rapamycin	ARH-77	0.687766	0.0189562	-0.91442	1.39413	0.8796	-0.733343	906765	2	0.1	8
3	Rapamycin	SCLC-21H	0.92014	0.0110359	1.30957	2.12697	0.3778	12.8373	753611	2	0.1	8
3	Rapamycin	MS-1	0.885418	0.0139126	1.95832	2.01941	0.0518	3.00135	753594	2	0.1	8
3	Rapamycin	no-10	0.565847	0.0218691	-3.00286	0.123538	0.997	-21.3828	908452	2	0.1	8
3	Rapamycin	EHEB	0.706819	0.0200162	-0.0473879	1.5449	0.8236	-0.973904	906854	2	0.1	8
3	Rapamycin	RPMI-8226	0.490334	0.0214433	-2.98441	0.164615	0.9906	-12.0254	905964	2	0.1	8
3	Rapamycin	LB647-SCLC	0.771399	0.0188529	0.29116	1.61714	0.7802	-5.54272	753582	2	0.1	8
3	Rapamycin	BOKU	0.659487	0.0563366	-1.70387	1.06727	0.945	-34.8448	753536	2	0.1	8
3	Rapamycin	NCI-H716	0.803757	0.0175987	1.43007	1.98212	0.421	-6.81926	908458	2	0.1	8
3	Rapamycin	SU-DHL-16	0.515689	0.0212339	-2.65846	0.183388	0.9894	-2.88994	1331034	2	0.1	8
3	Rapamycin	COR-L279	0.668519	0.0203814	-1.0038	1.17314	0.9092	-0.796733	910937	2	0.1	8
3	Rapamycin	RF-48	0.671402	0.0216009	-0.751164	1.21534	0.899	-13.7869	909697	2	0.1	8
3	Rapamycin	697	0.571797	0.0203046	-2.4863	0.240075	0.9834	-0.807746	906800	2	0.1	8
3	Rapamycin	JVM-3	0.99543	0.00107863	1.19759	0.917709	0.0042	55.5197	907270	2	0.1	8
3	Rapamycin	KE-37	0.610401	0.0200198	-2.18243	0.314098	0.976	0.0264397	907277	2	0.1	8
3	Rapamycin	A253	0.985159	0.00426751	1.52875	1.27553	0.0102	29.6568	906794	2	0.1	8
3	Rapamycin	HH	0.581069	0.0218057	-2.43015	0.406032	0.9742	-9.31243	907056	2	0.1	8
3	Rapamycin	LC-2-ad	0.419357	0.0215119	-3.25356	0.0563931	0.9998	-24.8425	907786	2	0.1	8
3	Rapamycin	NCI-H1155	0.883685	0.0136832	1.25922	1.93082	0.4234	7.66793	908467	2	0.1	8
3	Rapamycin	GCIY	0.681005	0.0196625	-1.22011	0.871971	0.9444	0.190534	906869	2	0.1	8
3	Rapamycin	NCI-H1666	0.886405	0.0135874	1.39176	1.90934	0.3678	5.30018	908473	2	0.1	8
3	Rapamycin	COLO-684	0.713334	0.0188303	-0.745869	1.37294	0.8724	3.27749	910691	2	0.1	8
3	Rapamycin	Becker	0.616669	0.0214913	-2.46322	0.749552	0.9666	-6.51463	906746	2	0.1	8
3	Rapamycin	MRK-nu-1	0.320718	0.0177929	-3.19595	0.0385889	1	-27.2537	908151	2	0.1	8
3	Rapamycin	ES7	0.941535	0.00942035	2.03604	1.7038	0.0316	6.96288	684059	2	0.1	8
3	Rapamycin	KS-1	0.406222	0.020911	-3.26687	0.0535884	0.9998	-29.6259	907313	2	0.1	8
3	Rapamycin	DMS-79	0.874124	0.0141425	0.788325	1.79998	0.562	12.1545	753551	2	0.1	8
3	Rapamycin	EM-2	0.592684	0.0225071	-2.85998	0.46282	0.9828	-14.1652	906855	2	0.1	8
3	Rapamycin	RL	0.989772	0.00275268	1.78984	1.70676	0.0072	27.4092	910861	2	0.1	8
3	Rapamycin	MZ7-mel	0.745205	0.01952	1.03052	1.91039	0.5758	-8.69871	753596	2	0.1	8
3	Rapamycin	HCC-33	0.95159	0.00854167	1.47397	1.91189	0.2066	9.21252	1303901	2	0.1	8
3	Rapamycin	NB5	0.80365	0.017237	0.946788	1.82151	0.6006	1.88076	949176	2	0.1	8
3	Rapamycin	SK-UT-1	0.578176	0.0208636	-2.7753	0.207169	0.988	-19.9112	909732	2	0.1	8
3	Rapamycin	TF-1	0.84093	0.016083	1.09326	1.79622	0.5084	2.80984	1331044	2	0.1	8
3	Rapamycin	LP-1	0.776012	0.0188219	0.564165	1.81627	0.7264	1.16356	907791	2	0.1	8
3	Rapamycin	LS-513	0.945845	0.00929444	1.71292	2.01177	0.1596	4.33154	907795	2	0.1	8
3	Rapamycin	DND-41	0.74643	0.0187557	0.448973	1.6904	0.7626	2.5476	1297446	2	0.1	8
3	Rapamycin	OCI-AML5	0.823546	0.0163704	0.930856	1.81433	0.5716	1.43935	1330983	2	0.1	8
3	Rapamycin	PL-21	0.700754	0.0192114	-1.21238	0.930006	0.9248	3.28921	1330991	2	0.1	8
3	Rapamycin	DU-4475	0.676586	0.0198793	-0.444036	1.43126	0.8774	-1.47307	906844	2	0.1	8
3	Rapamycin	NCI-H82	0.874729	0.0158322	0.901987	1.86344	0.4908	-1.93769	688031	2	0.1	8
3	Rapamycin	ES6	0.429116	0.0209016	-3.30124	0.0414043	1	-25.1192	949157	2	0.1	8
3	Rapamycin	CTB-1	0.771929	0.0183282	0.654264	1.67865	0.6946	1.46548	949088	2	0.1	8
3	Rapamycin	HDLM-2	0.769738	0.0191507	0.841094	1.82875	0.6652	0.11135	924110	2	0.1	8
3	Rapamycin	TC-71	0.993644	0.00163604	1.81887	1.39469	0.0058	39.7695	1240221	2	0.1	8
3	Rapamycin	TALL-1	0.842924	0.015915	1.50975	1.99633	0.3588	2.26242	909762	2	0.1	8
3	Rapamycin	KINGS-1	0.630855	0.0214734	-2.22316	0.962513	0.9568	-10.2801	907279	2	0.1	8
3	Rapamycin	HCC2218	0.89201	0.0135737	1.73903	2.06283	0.2122	3.85232	749716	2	0.1	8
3	Rapamycin	LC-1F	0.644246	0.0207291	-1.38674	1.04563	0.93	-2.34905	907785	2	0.1	8
3	Rapamycin	BC-1	0.721428	0.0180416	-1.5489	0.240447	0.9786	5.57944	910919	2	0.1	8
3	Rapamycin	A704	0.844602	0.0154016	1.01179	1.73654	0.5208	-17.3215	910920	2	0.1	8
3	Rapamycin	PSN1	0.636486	0.0209015	-2.68611	1.12276	0.9576	-12.3261	910546	2	0.1	8
3	Rapamycin	MOLT-4	0.744967	0.0182754	-0.0961534	1.60591	0.8236	5.11137	905958	2	0.1	8
3	Rapamycin	HCC2157	0.806349	0.0170717	0.583708	1.65474	0.6792	2.58553	749715	2	0.1	8
3	Rapamycin	SIMA	0.982732	0.00464926	1.72692	1.82024	0.012	20.4645	753620	2	0.1	8
3	Rapamycin	NCI-H2196	0.835246	0.0157396	0.956402	1.97849	0.6212	3.76337	908481	2	0.1	8
3	Rapamycin	NCI-H1876	0.900664	0.0123847	1.07641	1.94242	0.4644	12.6834	1330972	2	0.1	8
3	Rapamycin	SF268	0.780436	0.019491	0.843029	1.737	0.6296	-0.680962	905986	2	0.1	8
3	Rapamycin	Toledo	0.637774	0.0215163	-1.33895	1.24446	0.9078	-4.72848	1331046	2	0.1	8
3	Rapamycin	NCI-H1299	0.90305	0.0124009	1.56272	2.15513	0.2982	5.37496	724831	2	0.1	8
3	Rapamycin	ME-1	0.842291	0.0158871	1.17953	1.94135	0.5048	1.98008	1330942	2	0.1	8
3	Rapamycin	GAK	0.756498	0.0193408	0.627082	1.65803	0.7166	0.823846	910932	2	0.1	8
3	Rapamycin	CP67-MEL	0.590049	0.0235878	-2.8331	0.137294	0.9962	-19.4826	949092	2	0.1	8
3	Rapamycin	KGN	0.563332	0.0223472	-2.94393	0.112002	0.9966	-14.8476	924186	2	0.1	8
3	Rapamycin	VAL	0.798963	0.0171771	1.06047	1.83009	0.584	-0.287858	1331048	2	0.1	8
3	Rapamycin	LNCaP-Clone-FGC	0.770616	0.018347	0.8968	1.81731	0.634	-2.26578	907788	2	0.1	8
3	Rapamycin	LB831-BLC	0.993431	0.00193729	1.11557	0.631496	0.0062	47.9255	753584	2	0.1	8
3	Rapamycin	SK-NEP-1	0.579767	0.0217646	-2.43999	0.497429	0.977	-7.2815	909730	2	0.1	8
3	Rapamycin	NCI-SNU-1	0.792512	0.0179166	1.00632	1.75634	0.585	1.67181	908444	2	0.1	8
3	Rapamycin	L-428	0.738486	0.0190261	0.195921	1.74141	0.7808	5.24288	907322	2	0.1	8
3	Rapamycin	CP66-MEL	0.981977	0.00844633	1.06478	1.65518	0.0732	12.0758	753546	2	0.1	8
3	Rapamycin	IST-MES1	0.943278	0.00974	1.58334	1.78882	0.0864	8.16136	907173	2	0.1	8
3	Rapamycin	TGBC1TKB	0.341884	0.0181098	-3.2449	0.0335562	1	-42.0533	909769	2	0.1	8
3	Rapamycin	GI-1	0.610223	0.0232296	-2.92394	0.0642631	0.9998	-26.799	906871	2	0.1	8
3	Rapamycin	OS-RC-2	0.520338	0.021228	-3.05225	0.0615192	0.9996	-19.7751	909250	2	0.1	8
3	Rapamycin	SH-4	0.539776	0.0240364	-3.01467	0.134023	0.9958	-19.9789	909713	2	0.1	8
3	Rapamycin	HD-MY-Z	0.766783	0.0192531	0.723788	1.83972	0.7016	1.35213	907050	2	0.1	8
3	Rapamycin	BE2-M17	0.881259	0.0139273	1.30071	2.00416	0.4232	6.77829	753616	2	0.1	8
3	Rapamycin	LU-134-A	0.941569	0.00957146	1.50498	1.93911	0.2424	14.1602	753588	2	0.1	8
3	Rapamycin	KNS-81-FD	0.716158	0.0207404	0.782728	1.93623	0.685	-6.77727	924188	2	0.1	8
3	Rapamycin	A3-KAW	0.516904	0.0212254	-2.72666	0.150263	0.9934	-3.16754	910935	2	0.1	8
3	Rapamycin	MOLM-13	0.709973	0.0193302	-0.861719	1.20675	0.8832	3.64629	1330947	2	0.1	8
3	Rapamycin	D-502MG	0.914386	0.0121032	1.46583	2.09426	0.2722	4.06925	946373	2	0.1	8
3	Rapamycin	COLO-824	0.828635	0.0162291	1.32867	1.84547	0.4302	0.996487	906812	2	0.1	8
3	Rapamycin	CA46	0.827227	0.01869	1.11785	1.97259	0.4064	-9.01302	910703	2	0.1	8
3	Rapamycin	NCI-H446	0.960691	0.00780977	1.41778	1.9569	0.1866	28.3467	688023	2	0.1	8
3	Rapamycin	AM-38	0.872906	0.0144154	0.967132	1.87438	0.5106	3.11997	910933	2	0.1	8
3	Rapamycin	BB65-RCC	0.610189	0.0226535	-2.99336	0.398375	0.99	-15.0815	753533	2	0.1	8
3	Rapamycin	H9	0.634635	0.0212346	-1.4631	1.08519	0.927	-5.71598	907043	2	0.1	8
3	Rapamycin	SU-DHL-1	0.876354	0.0137262	1.58709	1.99325	0.3336	3.16513	909742	2	0.1	8
3	Rapamycin	NCI-H1092	0.926044	0.0107288	1.34556	1.76124	0.2488	-1.63571	687997	2	0.1	8
3	Rapamycin	DEL	0.633242	0.0191297	-2.27611	0.227643	0.9858	0.85233	906836	2	0.1	8
3	Rapamycin	C2BBe1	0.708824	0.0194357	0.036202	1.72159	0.8056	-4.15376	910700	2	0.1	8
3	Rapamycin	SU-DHL-6	0.397531	0.0196548	-3.07972	0.0951063	0.9974	-10.3025	1331037	2	0.1	8
3	Rapamycin	LB2518-MEL	0.994769	0.00125598	2.26067	1.56211	0.0038	45.5311	753579	2	0.1	8
3	Rapamycin	ES3	0.938663	0.0106087	1.98133	1.64709	0.0338	6.49776	684055	2	0.1	8
3	Rapamycin	KP-N-YN	0.897026	0.012919	1.24807	1.80419	0.3684	4.77471	907314	2	0.1	8
3	Rapamycin	P3HR-1	0.437663	0.0204492	-3.10986	0.0903117	0.9984	-13.0135	1330988	2	0.1	8
3	Rapamycin	TE-6	0.50916	0.0223032	-2.98646	0.220685	0.99	-17.5306	946355	2	0.1	8
3	Rapamycin	NB(TU)1-10	0.916205	0.0115564	1.35636	1.89439	0.3146	6.59823	1240181	2	0.1	8
3	Rapamycin	ECC4	0.759713	0.0178278	0.311742	1.94674	0.6828	3.90148	906850	2	0.1	8
3	Rapamycin	NALM-6	0.773833	0.0180643	0.927883	1.81716	0.6334	2.63817	908158	2	0.1	8
3	Rapamycin	CPC-N	0.929799	0.0172314	1.00062	1.96728	0.4056	1.21019	753547	2	0.1	8
3	Rapamycin	WSU-DLCL2	0.989711	0.00278893	0.979155	1.57271	0.0864	50.7889	1331050	2	0.1	8
3	Rapamycin	OCI-AML2	0.927675	0.0107831	1.1784	1.8647	0.3612	8.38493	910947	2	0.1	8
3	Rapamycin	MPP-89	0.973878	0.00658919	1.66013	2.15592	0.0148	-1.4955	908150	2	0.1	8
3	Rapamycin	BE-13	0.494701	0.0211751	-2.83302	0.125491	0.9948	-7.04328	906763	2	0.1	8
3	Rapamycin	KARPAS-299	0.698481	0.0196347	-0.304886	1.68061	0.836	2.29942	907273	2	0.1	8
3	Rapamycin	VCaP	0.900583	0.0125997	1.08921	1.80312	0.4412	9.08353	1299075	2	0.1	8
3	Rapamycin	HSC-39	0.9961	0.000839696	1.75418	1.36534	0.0032	64.5575	1322224	2	0.1	8
3	Rapamycin	WSU-NHL	0.833911	0.0162652	1.48291	2.07585	0.3936	0.971353	909785	2	0.1	8
3	Rapamycin	ROS-50	0.743834	0.019361	0.546622	1.69299	0.7384	1.533	1331025	2	0.1	8
3	Rapamycin	SNU-C2B	0.84423	0.0185425	1.56308	2.23187	0.0604	-5.89844	909740	2	0.1	8
3	Rapamycin	NCI-H345	0.988867	0.00290004	0.983029	1.57607	0.1106	50.2347	688021	2	0.1	8
3	Rapamycin	RPMI-6666	0.636461	0.0210139	-1.67711	0.487558	0.963	-2.61524	909701	2	0.1	8
3	Rapamycin	LOUCY	0.793227	0.0175563	0.665815	1.84396	0.6822	2.47413	907789	2	0.1	8
3	Rapamycin	NB6	0.909247	0.0123535	1.43973	2.06855	0.3192	0.664694	949173	2	0.1	8
3	Rapamycin	KURAMOCHI	0.670784	0.0217373	-0.302879	1.7147	0.8492	-8.9463	909975	2	0.1	8
3	Rapamycin	SK-ES-1	0.804605	0.0166053	0.561309	1.74781	0.705	6.26684	684072	2	0.1	8
3	Rapamycin	YT	0.980863	0.00461367	1.83152	1.53869	0.014	11.7255	946358	2	0.1	8
3	Rapamycin	NCI-H524	0.784375	0.0184067	1.05743	1.7368	0.5838	3.29304	908483	2	0.1	8
3	Rapamycin	GT3TKB	0.883625	0.0143674	1.54809	1.98352	0.2994	4.5829	907041	2	0.1	8
3	Rapamycin	EJM	0.833873	0.0163141	1.10506	1.94871	0.5452	4.16117	1297447	2	0.1	8
3	Rapamycin	LB1047-RCC	0.585198	0.02017	-2.69418	0.0925119	0.999	-9.9652	753577	2	0.1	8
3	Rapamycin	COLO-668	0.740479	0.0197402	0.948876	1.78726	0.661	-6.57684	910692	2	0.1	8
3	Rapamycin	DMS-114	0.683969	0.0203239	-0.484116	1.50973	0.8612	0.284594	687983	2	0.1	8
3	Rapamycin	KYM-1	0.470374	0.0227639	-3.15501	0.0877589	0.9992	-17.0309	1240166	2	0.1	8
3	Rapamycin	MONO-MAC-6	0.779457	0.0178225	0.630136	1.70011	0.702	6.30278	908148	2	0.1	8
3	Rapamycin	NCI-H1436	0.935798	0.0101394	1.41073	1.83482	0.2506	13.4829	908469	2	0.1	8
3	Rapamycin	H-EMC-SS	0.833643	0.0157948	0.883096	1.88506	0.6084	8.28795	907290	2	0.1	8
3	Rapamycin	HC-1	0.713646	0.0202974	-0.122497	1.50559	0.8388	-0.714073	907044	2	0.1	8
3	Rapamycin	NCI-H1385	0.776917	0.0184143	0.463503	1.7339	0.742	3.11722	1330965	2	0.1	8
3	Rapamycin	L-363	0.677437	0.0209557	-1.01734	1.24865	0.8918	0.675985	924239	2	0.1	8
3	Rapamycin	DOHH-2	0.576977	0.0210059	-2.75762	0.262788	0.985	-12.9485	906842	2	0.1	8
3	Rapamycin	GI-ME-N	0.80994	0.023888	1.37473	2.03755	0.392	-13.745	906872	2	0.1	8
3	Rapamycin	EoL-1-cell	0.661685	0.0226004	-1.53804	2.06064	0.8588	-18.6429	906856	2	0.1	8
3	Rapamycin	KARPAS-45	0.779005	0.0177551	0.605433	1.67542	0.7032	5.70648	907272	2	0.1	8
3	Rapamycin	OCI-LY-19	0.75889	0.0182582	0.232629	1.48101	0.781	3.7291	1330984	2	0.1	8
3	Rapamycin	L-540	0.72517	0.0195471	0.355889	1.60661	0.781	0.154505	907323	2	0.1	8
3	Rapamycin	NCI-H1522	0.841782	0.0152599	0.58737	1.68786	0.661	5.74848	908464	2	0.1	8
3	Rapamycin	OMC-1	0.790452	0.0184723	0.867213	1.8267	0.6154	-7.51818	949154	2	0.1	8
3	Rapamycin	KU812	0.521454	0.0232622	-2.79754	0.261959	0.9818	-11.88	907311	2	0.1	8
3	Rapamycin	CAL-148	0.848451	0.0162849	1.25202	1.91312	0.4488	4.92576	924106	2	0.1	8
3	Rapamycin	D-263MG	0.897745	0.018026	1.59254	1.99466	0.2072	-4.74201	946368	2	0.1	8
3	Rapamycin	NOS-1	0.40731	0.0197899	-3.07633	0.0457622	1	-32.0703	925345	2	0.1	8
3	Rapamycin	KP-N-RT-BM-1	0.792643	0.0178423	0.824076	1.79797	0.6236	-1.08808	924189	2	0.1	8
3	Rapamycin	SIG-M5	0.616702	0.0204568	-1.89435	0.41929	0.9692	-1.24924	909715	2	0.1	8
3	Rapamycin	NCI-H719	0.855897	0.0156794	1.16073	1.9267	0.4776	1.65693	924242	2	0.1	8
3	Rapamycin	KLE	0.692386	0.0208948	-1.01362	2.00291	0.8346	-12.6697	924187	2	0.1	8
3	Rapamycin	REH	0.943511	0.00905196	1.46875	1.91756	0.2136	9.23463	909696	2	0.1	8
3	Rapamycin	GDM-1	0.697504	0.0200516	-0.202203	1.58591	0.8436	-2.27017	906870	2	0.1	8
3	Rapamycin	ES5	0.991234	0.00254016	1.31434	1.4704	0.0084	43.1143	684057	2	0.1	8
3	Rapamycin	GRANTA-519	0.807822	0.0171109	0.812883	1.82735	0.651	4.78029	1303897	2	0.1	8
3	Rapamycin	MKL-2	0.827827	0.017068	0.795624	1.77682	0.6322	-3.60485	1333015	2	0.1	8
3	Rapamycin	ML-2	0.829809	0.0165137	0.897335	1.82808	0.5786	6.61845	908141	2	0.1	8
3	Rapamycin	NCI-H1581	0.78607	0.0179338	0.723892	1.90409	0.6802	1.21784	908471	2	0.1	8
3	Rapamycin	HA7-RCC	0.491706	0.0273645	-3.04699	0.105654	0.9962	-26.1917	753558	2	0.1	8
3	Rapamycin	JJN-3	0.64517	0.0204953	-1.16415	1.24775	0.9052	-3.66222	1327766	2	0.1	8
3	Rapamycin	TE-8	0.728117	0.0173575	-2.82823	0.340616	0.9932	-24.1145	753623	2	0.1	8
3	Rapamycin	TE-1	0.710198	0.0195509	0.302912	2.12942	0.7238	-9.87995	753621	2	0.1	8
3	Rapamycin	SUP-M2	0.900351	0.0114912	0.786933	1.77194	0.4688	27.6067	1331040	2	0.1	8
3	Rapamycin	NCI-H1355	0.414808	0.0199957	-3.13141	0.0431313	1	-28.7541	724866	2	0.1	8
3	Rapamycin	SUP-T1	0.943041	0.0093006	1.95371	1.7826	0.0172	12.7416	909743	2	0.1	8
3	Rapamycin	MC-CAR	0.968797	0.0063791	1.4722	2.03909	0.1564	13.4563	683665	2	0.1	8
3	Rapamycin	KARPAS-620	0.337808	0.0188338	-3.19693	0.0547161	0.9998	-13.5586	1327775	2	0.1	8
3	Rapamycin	Tera-1	0.821171	0.0169309	0.978392	1.88804	0.5808	2.12275	1331043	2	0.1	8
3	Rapamycin	HOP-62	0.643748	0.0222014	-1.65258	1.60681	0.9078	-8.52416	905972	2	0.1	8
3	Rapamycin	SW982	0.674902	0.0200192	-2.39339	1.05902	0.966	-11.7703	909759	2	0.1	8
3	Rapamycin	EW-12	0.695904	0.0195236	-0.421867	1.57639	0.859	-4.57674	949162	2	0.1	8
3	Rapamycin	ETK-1	0.375028	0.0175639	-3.16841	0.0373132	1	-32.2987	906861	2	0.1	8
3	Rapamycin	GR-ST	0.53944	0.0245318	-3.11751	0.0941875	0.9994	-22.8212	906877	2	0.1	8
3	Rapamycin	IM-9	0.885289	0.0140753	1.72966	1.71319	0.164	0.367046	753563	2	0.1	8
3	Rapamycin	HT-144	0.588363	0.0215463	-2.95119	0.092394	0.9976	-23.5852	907067	2	0.1	8
3	Rapamycin	SW684	0.891361	0.0164783	1.47326	2.1995	0.3064	-5.85134	909754	2	0.1	8
3	Rapamycin	KASUMI-1	0.929959	0.010542	1.63178	2.05866	0.209	20.4451	907275	2	0.1	8
3	Rapamycin	HAL-01	0.777053	0.0173539	0.439868	1.6573	0.7374	4.78679	949153	2	0.1	8
3	Rapamycin	Kasumi-3	0.823894	0.0169832	1.092	1.86281	0.5378	4.1872	1327776	2	0.1	8
3	Rapamycin	BB30-HNC	0.682094	0.0215384	-0.615411	1.88619	0.8296	-10.5667	753531	2	0.1	8
3	Rapamycin	NCI-H64	0.942319	0.00938653	1.47909	1.80576	0.2122	23.7731	688026	2	0.1	8
3	Rapamycin	TC-YIK	0.897937	0.0132443	1.49562	1.90025	0.3262	0.57475	946357	2	0.1	8
3	Rapamycin	OCI-AML3	0.996062	0.000868902	2.57545	2.6171	0.0044	64.5575	1290455	2	0.1	8
3	Rapamycin	TGW	0.920688	0.0111324	1.45572	1.78891	0.28	8.42303	910780	2	0.1	8
3	Rapamycin	MFH-ino	0.60739	0.0208673	-2.90122	0.127491	0.9976	-11.6363	925343	2	0.1	8
3	Rapamycin	NCI-H2171	0.818429	0.017311	1.4064	1.87092	0.4594	-1.31514	688015	2	0.1	8
3	Rapamycin	P30-OHK	0.833893	0.0172857	1.10018	1.95366	0.4798	-3.84761	909252	2	0.1	8
3	Rapamycin	LS-1034	0.766719	0.0183693	0.863313	1.74486	0.6398	-8.31051	917486	2	0.1	8
3	Rapamycin	MN-60	0.738007	0.0189634	0.127541	1.61649	0.803	2.18574	908143	2	0.1	8
3	Rapamycin	LXF-289	0.76632	0.0192215	0.901576	1.79525	0.6364	-4.30384	753592	2	0.1	8
3	Rapamycin	BV-173	0.718982	0.0197174	-0.340036	1.58118	0.8202	3.22824	910710	2	0.1	8
3	Rapamycin	SUP-HD1	0.637613	0.0242103	-1.7964	1.18998	0.948	-16.1478	1331039	2	0.1	8
3	Rapamycin	WIL2-NS	0.62144	0.0205703	-1.88819	0.71367	0.9538	-6.94685	1331049	2	0.1	8
3	Rapamycin	LS-123	0.690066	0.0221366	0.0697692	2.26102	0.7236	-12.1496	907792	2	0.1	8
3	Rapamycin	SLVL	0.636239	0.0208317	-1.8133	0.603718	0.9616	1.947	1331032	2	0.1	8
3	Rapamycin	KG-1	0.869285	0.0145473	1.02014	1.97987	0.5338	10.5827	907278	2	0.1	8
3	Rapamycin	KARPAS-231	0.502705	0.0213906	-2.89981	0.175085	0.991	-9.56764	1327774	2	0.1	8
3	Rapamycin	KALS-1	0.543949	0.023963	-2.93162	0.138938	0.9942	-15.8821	907271	2	0.1	8
3	Rapamycin	LB373-MEL-D	0.816062	0.0217872	1.40004	2.04498	0.4374	-13.492	753581	2	0.1	8
3	Rapamycin	LB2241-RCC	0.963279	0.00726125	1.33904	1.94248	0.1902	8.01543	753578	2	0.1	8
3	Rapamycin	SK-MEL-2	0.872222	0.0143577	1.68845	2.0323	0.2568	-0.17347	905955	2	0.1	8
3	Rapamycin	KM12	0.920633	0.0114594	1.89147	1.90684	0.138	5.94599	905989	2	0.1	8
3	Rapamycin	EB-3	0.637653	0.021643	-1.37394	1.15308	0.9212	-5.51553	906847	2	0.1	8
3	Rapamycin	SK-LMS-1	0.51793	0.0220691	-2.94168	0.168034	0.9902	-12.289	909720	2	0.1	8
3	Rapamycin	NH-12	0.97413	0.00557224	1.21609	1.89584	0.1556	15.8803	908447	2	0.1	8
3	Rapamycin	MZ2-MEL	0.701192	0.0197984	-0.48322	1.8884	0.812	-7.4462	971777	2	0.1	8
3	Rapamycin	U-87-MG	0.792447	0.0176569	0.968644	1.88828	0.6122	1.35798	687590	2	0.1	8
3	Rapamycin	MOLP-8	0.438384	0.0234612	-3.0792	0.100201	0.9988	-15.1487	1330950	2	0.1	8
3	Rapamycin	COLO-829	0.995319	0.00119761	1.71071	1.96434	0.0044	51.2667	687448	2	0.1	8
3	Rapamycin	LB996-RCC	0.596677	0.0223985	-2.87705	0.101492	0.9986	-13.3787	753585	2	0.1	8
3	Rapamycin	TE-12	0.656915	0.0227012	-2.20218	1.25584	0.9566	-11.7576	946356	2	0.1	8
3	Rapamycin	RCC10RGB	0.711224	0.0220468	-2.47671	1.1637	0.9258	-19.4277	909974	2	0.1	8
3	Rapamycin	LAN-6	0.920035	0.0117129	1.42054	1.90725	0.2852	9.09315	949170	2	0.1	8
3	Rapamycin	ATN-1	0.736297	0.0192467	0.418122	1.68109	0.7542	-0.0860097	910687	2	0.1	8
3	Rapamycin	HCC1500	0.805553	0.0181736	1.43625	1.87863	0.4306	-5.07348	1303900	2	0.1	8
3	Rapamycin	NCI-H128	0.891977	0.013452	1.36457	1.87569	0.362	5.64637	753597	2	0.1	8
3	Rapamycin	8-MG-BA	0.769102	0.0186367	0.690126	1.73906	0.7002	-1.79743	687562	2	0.1	8
3	Rapamycin	SJSA-1	0.666278	0.0211101	-0.591523	1.78231	0.8612	-6.62841	909717	2	0.1	8
3	Rapamycin	JVM-2	0.82198	0.0185671	0.959653	1.89381	0.579	-0.149042	907269	2	0.1	8
3	Rapamycin	NCI-H226	0.930308	0.0106618	1.8374	1.38885	0.0388	7.89708	905941	2	0.1	8
3	Rapamycin	SF539	0.388935	0.0197276	-3.14365	0.0462516	1	-21.912	905984	2	0.1	8
3	Rapamycin	NCI-H1975	0.69529	0.0212011	0.281985	1.73966	0.7946	-5.87532	924244	2	0.1	8
3	Rapamycin	COR-L88	0.984524	0.0044112	1.70881	1.7904	0.0102	36.4635	906808	2	0.1	8
3	Rapamycin	K052	0.718997	0.0199662	0.331456	1.60911	0.7754	-3.46772	907284	2	0.1	8
3	Rapamycin	NCI-H2081	0.942981	0.00930657	1.03492	1.83851	0.3686	0.719769	908480	2	0.1	8
3	Rapamycin	ES-2	0.920156	0.0117183	1.36415	2.03624	0.3378	8.25509	1240128	2	0.1	8
3	Rapamycin	NEC8	0.954937	0.0140999	1.01867	1.90632	0.173	0.805547	910942	2	0.1	8
3	Rapamycin	EW-1	0.501164	0.0210106	-2.81906	0.160297	0.9916	-8.03579	949163	2	0.1	8
3	Rapamycin	GA-10	0.222278	0.0130567	-3.26153	0.0311861	1	-37.1066	1303896	2	0.1	8
3	Rapamycin	BB49-HNC	0.901197	0.0147235	0.425736	1.74668	0.5272	-4.7263	753532	2	0.1	8
3	Rapamycin	ALL-SIL	0.765013	0.0186255	0.314803	1.74278	0.7578	3.33792	1295740	2	0.1	8
3	Rapamycin	NCI-H1869	0.788218	0.0174461	0.700472	1.74579	0.6866	2.16006	1240183	2	0.1	8
3	Rapamycin	KOPN-8	0.560245	0.0215307	-2.70298	0.264205	0.9788	-4.75149	1330933	2	0.1	8
3	Rapamycin	A388	0.608665	0.0205324	-2.84569	0.322614	0.9934	-17.6892	910697	2	0.1	8
3	Rapamycin	COLO-800	0.839389	0.0146993	0.600156	1.84692	0.644	2.4173	906813	2	0.1	8
3	Rapamycin	CGTH-W-1	0.817745	0.0173601	1.01074	1.98226	0.5768	-3.4039	910568	2	0.1	8
3	Rapamycin	EW-24	0.994409	0.00131452	1.25454	1.36261	0.022	50.1908	949168	2	0.1	8
3	Rapamycin	K5	0.667395	0.0209042	-1.17984	1.53218	0.899	-4.76867	924238	2	0.1	8
3	Rapamycin	NB14	0.806004	0.0170189	0.879798	1.66499	0.5828	0.29778	949178	2	0.1	8
3	Rapamycin	NB69	0.805108	0.0172203	1.0077	1.99603	0.611	-0.237351	908440	2	0.1	8
3	Rapamycin	LAMA-84	0.733983	0.0195132	0.538648	1.78074	0.7616	-1.27133	907783	2	0.1	8
3	Rapamycin	Hs-445	0.871919	0.0146038	1.08303	1.89534	0.4734	3.30111	1322218	2	0.1	8
3	Rapamycin	LU-165	0.951487	0.00824715	1.29063	1.82476	0.2518	16.2277	753589	2	0.1	8
3	Rapamycin	SK-MEL-1	0.875348	0.0139979	1.59482	1.95926	0.2942	3.27805	909723	2	0.1	8
3	Rapamycin	VA-ES-BJ	0.459781	0.0220914	-3.03653	0.0682357	0.9996	-15.5842	688121	2	0.1	8
3	Rapamycin	NCI-H2141	0.933091	0.0101474	1.3782	1.90107	0.2698	20.0247	688014	2	0.1	8
3	Rapamycin	TE-15	0.488281	0.0242657	-3.08142	0.103025	0.9992	-18.7096	753614	2	0.1	8
3	Rapamycin	HEL	0.647035	0.0204779	-1.57387	1.0804	0.9334	-0.388037	907053	2	0.1	8
3	Rapamycin	SW962	0.695223	0.0212067	-0.501898	2.0933	0.7996	-7.76181	909758	2	0.1	8
3	Rapamycin	HL-60	0.85294	0.0152665	0.806796	1.85866	0.584	7.59503	905938	2	0.1	8
5	Sunitinib	LU-65	0.883953	0.0138845	2.97001	1.9404	0.504	3.4673	724863	2	8	8
5	Sunitinib	KMS-12-BM	0.836856	0.0129998	0.617909	0.145863	0.998	6.6478	907281	2	8	8
5	Sunitinib	SR	0.73002	0.0111006	0.199688	0.0427293	1	18.5824	905965	2	8	8
5	Sunitinib	SUP-B15	0.912338	0.0104952	1.37759	1.27033	0.7852	20.6634	1247871	2	8	8
5	Sunitinib	KG-1	0.853123	0.0137839	1.93025	1.60902	0.7256	18.8931	907278	2	8	8
5	Sunitinib	SW872	0.793409	0.0181203	1.28411	1.21023	0.8878	-4.74153	909756	2	8	8
5	Sunitinib	BE2-M17	0.979565	0.00456988	2.3704	1.55294	0.2828	46.4552	753616	2	8	8
5	Sunitinib	MLMA	0.965801	0.00573727	1.6142	1.19432	0.5714	32.7402	908142	2	8	8
5	Sunitinib	SCC-15	0.829602	0.0157354	2.69497	1.82462	0.6374	4.70505	910911	2	8	8
5	Sunitinib	OVCAR-4	0.872239	0.0123753	1.50244	1.32893	0.8004	16.4019	905990	2	8	8
5	Sunitinib	KMOE-2	0.885128	0.0115378	0.818002	0.291323	0.9878	1.4273	907280	2	8	8
5	Sunitinib	ES1	0.919773	0.0102513	2.05713	1.7355	0.578	29.1144	949158	2	8	8
5	Sunitinib	MDST8	0.98621	0.00327738	2.96102	1.7047	0.1194	28.1343	1240173	2	8	8
5	Sunitinib	AMO-1	0.914238	0.00925295	0.883898	0.302402	0.9838	12.8574	1295741	2	8	8
5	Sunitinib	HD-MY-Z	0.886286	0.0105327	0.799202	0.498189	0.9734	32.3252	907050	2	8	8
5	Sunitinib	JAR	0.777842	0.0147023	0.489385	0.0744645	1	5.45891	907175	2	8	8
5	Sunitinib	HUTU-80	0.901344	0.00893774	0.699869	0.0406988	1	21.8374	907073	2	8	8
5	Sunitinib	NB13	0.874644	0.0133471	1.54379	1.27995	0.8126	0.628911	949177	2	8	8
5	Sunitinib	U-87-MG	0.994821	0.00127749	3.29239	1.91566	0.0258	57.1236	687590	2	8	8
5	Sunitinib	SF126	0.719344	0.018585	0.516818	0.263551	0.9878	1.52648	909712	2	8	8
5	Sunitinib	TE-11	0.689789	0.0231268	0.252298	0.103105	0.9972	-3.64771	946354	2	8	8
5	Sunitinib	NCI-H322M	0.93424	0.00987772	3.03286	1.87086	0.3424	19.9872	905967	2	8	8
5	Sunitinib	CTV-1	0.741627	0.0125923	0.228893	0.0598727	1	10.989	753548	2	8	8
5	Sunitinib	EW-18	0.99039	0.00265223	3.74544	1.75684	0.0092	33.8311	949164	2	8	8
5	Sunitinib	KCL-22	0.922175	0.0090041	1.26834	0.953573	0.8356	13.4183	1330931	2	8	8
5	Sunitinib	NCI-H2135	0.96665	0.0064602	2.17189	1.52042	0.4004	31.1747	1298352	2	8	8
5	Sunitinib	DB	0.985301	0.00368583	3.09265	1.44695	0.082	29.3944	906832	2	8	8
5	Sunitinib	RKO	0.933856	0.00681951	0.790515	0.0371765	0.9998	30.7444	909698	2	8	8
5	Sunitinib	NCI-H1838	0.98743	0.00346315	2.9655	1.46889	0.0948	47.9959	687807	2	8	8
5	Sunitinib	H9	0.729054	0.0174211	0.369579	0.0926441	0.9978	2.32137	907043	2	8	8
5	Sunitinib	LB996-RCC	0.775285	0.0164222	0.615145	0.450716	0.974	-5.93531	753585	2	8	8
5	Sunitinib	LS-411N	0.815878	0.056757	0.540126	0.177742	1	-28.637	907794	2	8	8
5	Sunitinib	MS-1	0.832355	0.0114508	0.524001	0.0496279	1	20.2663	753594	2	8	8
5	Sunitinib	NCI-H1436	0.996067	0.000861838	3.77199	1.75822	0.0034	64.5575	908469	2	8	8
5	Sunitinib	LOUCY	0.923128	0.00989012	2.02748	1.63681	0.5996	19.9786	907789	2	8	8
5	Sunitinib	NB7	0.942234	0.00891515	2.78622	2.06625	0.3564	33.0615	949174	2	8	8
5	Sunitinib	NCI-H209	0.887938	0.0118233	1.51416	1.44303	0.7976	6.90607	688013	2	8	8
5	Sunitinib	KASUMI-1	0.94298	0.00903007	3.18611	2.01661	0.298	15.4256	907275	2	8	8
5	Sunitinib	CL-11	0.992854	0.00165514	3.19236	1.47387	0.0328	33.2265	1290769	2	8	8
5	Sunitinib	NCI-H211	0.881656	0.0142352	0.782204	0.0435637	1	-13.1319	1240189	2	8	8
5	Sunitinib	OCI-AML2	0.67881	0.0142521	0.134744	0.0547195	1	-2.55832	910947	2	8	8
5	Sunitinib	VCaP	0.964775	0.00655383	2.9494	1.81804	0.2356	33.3403	1299075	2	8	8
5	Sunitinib	TK10	0.897108	0.0105326	0.75938	0.0455189	0.9996	6.31063	905980	2	8	8
5	Sunitinib	ST486	0.918197	0.0096032	1.2622	1.15512	0.7756	35.1686	910906	2	8	8
5	Sunitinib	NAMALWA	0.766948	0.0132345	0.357779	0.0548002	1	0.121962	908159	2	8	8
5	Sunitinib	NCI-H1304	0.944725	0.00764527	1.42635	1.13815	0.7074	39.2367	753599	2	8	8
5	Sunitinib	NCI-H526	0.95978	0.00711223	3.01863	1.99386	0.2644	29.2879	688025	2	8	8
5	Sunitinib	IA-LM	0.932504	0.00990342	0.830739	0.16562	0.9932	28.4154	910779	2	8	8
5	Sunitinib	NB4	0.758535	0.0154595	0.324918	0.0870138	0.9984	12.5485	1323913	2	8	8
5	Sunitinib	NCI-H23	0.94756	0.00832674	2.84472	1.7981	0.3216	36.38	905942	2	8	8
5	Sunitinib	MSTO-211H	0.897546	0.0123987	2.62768	1.84106	0.564	6.93507	908152	2	8	8
5	Sunitinib	RPMI-8402	0.783415	0.0120907	0.371269	0.0471005	1	14.6571	909702	2	8	8
5	Sunitinib	IST-SL1	0.827967	0.0151208	0.954574	0.660349	0.9576	3.48313	753564	2	8	8
5	Sunitinib	EM-2	0.846468	0.0150727	2.18965	1.68631	0.7096	3.85023	906855	2	8	8
5	Sunitinib	KM-H2	0.90613	0.0113742	2.76118	1.86313	0.5108	12.3028	909976	2	8	8
5	Sunitinib	EW-16	0.717429	0.0160771	0.300438	0.0783319	0.9996	-4.51555	949165	2	8	8
5	Sunitinib	GCIY	0.993808	0.00148436	3.32787	1.57537	0.0354	45.0429	906869	2	8	8
5	Sunitinib	JiyoyeP-2003	0.970255	0.00536315	1.64864	1.38169	0.5626	42.6655	907268	2	8	8
5	Sunitinib	RH-1	0.994295	0.00140732	3.03428	1.46066	0.0346	55.2432	971773	2	8	8
5	Sunitinib	Raji	0.978396	0.00462624	2.15675	1.47624	0.3272	45.9458	909262	2	8	8
5	Sunitinib	NCI-H82	0.891553	0.011506	1.28525	1.21269	0.8376	10.388	688031	2	8	8
5	Sunitinib	NCI-SNU-5	0.994047	0.0015666	3.20235	1.27163	0.0046	43.9933	908445	2	8	8
5	Sunitinib	CESS	0.859588	0.0136286	0.998235	0.76772	0.9488	3.54965	910688	2	8	8
5	Sunitinib	KELLY	0.971415	0.00589957	2.1352	1.5524	0.3878	43.4076	753618	2	8	8
5	Sunitinib	KNS-81-FD	0.994037	0.00166402	3.30013	0.828048	0.005	49.3093	924188	2	8	8
5	Sunitinib	D-283MED	0.888911	0.0120345	1.32911	1.06422	0.8564	2.79145	906834	2	8	8
5	Sunitinib	HCC-33	0.952183	0.00827448	3.17864	1.97017	0.2838	13.4021	1303901	2	8	8
5	Sunitinib	TGBC24TKB	0.984235	0.00516151	3.20918	1.94653	0.105	16.5106	910695	2	8	8
5	Sunitinib	GDM-1	0.310956	0.0177555	-1.27457	0.0667204	0.9996	-15.7301	906870	2	8	8
5	Sunitinib	GT3TKB	0.871362	0.0149837	0.884612	0.507102	0.9624	-5.24536	907041	2	8	8
5	Sunitinib	NCI-H1648	0.848092	0.0223265	1.17416	0.97607	0.8964	-7.26037	687799	2	8	8
5	Sunitinib	OCI-AML5	0.468438	0.0189453	-0.586786	0.172345	0.9894	-8.56137	1330983	2	8	8
5	Sunitinib	NCI-H2107	0.857299	0.012903	0.709865	0.0478331	1	-3.57519	924246	2	8	8
5	Sunitinib	NCI-H1963	0.981637	0.00443882	3.3111	1.70373	0.092	17.9225	688010	2	8	8
5	Sunitinib	UACC-257	0.682297	0.0988874	0.0852328	0.324134	0.9992	-22.9054	905977	2	8	8
5	Sunitinib	NCI-H720	0.985783	0.00385045	3.29395	1.95589	0.075	28.8548	687600	2	8	8
5	Sunitinib	RPMI-8866	0.99379	0.00160379	2.81273	1.43512	0.0548	53.6161	910544	2	8	8
5	Sunitinib	K052	0.781381	0.0141084	0.378004	0.0821036	0.9994	14.7713	907284	2	8	8
5	Sunitinib	GOTO	0.951452	0.00694118	1.39973	1.01054	0.7284	33.5465	906875	2	8	8
5	Sunitinib	MZ1-PC	0.81116	0.0135682	0.563256	0.0519671	1	-16.4235	753595	2	8	8
5	Sunitinib	ALL-PO	0.370759	0.0195856	-1.19744	0.101396	0.9966	-14.4928	910944	2	8	8
5	Sunitinib	HCC2218	0.994597	0.00133201	3.19603	1.5136	0.0302	56.2735	749716	2	8	8
5	Sunitinib	HCC1599	0.894363	0.0116166	1.29941	1.07409	0.8528	18.7457	749713	2	8	8
5	Sunitinib	HH	0.873682	0.0118837	0.677415	0.224174	0.9886	32.0236	907056	2	8	8
5	Sunitinib	CA46	0.865606	0.0136461	2.3237	1.59422	0.6678	6.79278	910703	2	8	8
5	Sunitinib	MEG-01	0.768779	0.012702	0.276333	0.056529	1	22.9628	908126	2	8	8
5	Sunitinib	NCI-H1355	0.868983	0.014494	1.03061	0.763097	0.8928	-7.16952	724866	2	8	8
5	Sunitinib	PF-382	0.777537	0.0137011	0.460145	0.0515052	1	-1.30985	909260	2	8	8
5	Sunitinib	Ramos-2G6-4C10	0.923583	0.00936381	1.36593	1.05886	0.8072	9.68405	910401	2	8	8
5	Sunitinib	NCI-H1770	0.889776	0.0124142	2.23797	1.71673	0.6324	11.5845	687804	2	8	8
5	Sunitinib	NCI-H69	0.94868	0.00904635	3.24754	1.93596	0.2454	6.75698	688027	2	8	8
5	Sunitinib	SK-N-FI	0.938525	0.00891814	2.52059	1.77034	0.4328	36.2249	688087	2	8	8
5	Sunitinib	8-MG-BA	0.89685	0.0111693	0.960792	0.700591	0.9212	19.902	687562	2	8	8
5	Sunitinib	NCI-H1836	0.962055	0.00672133	2.33583	1.60086	0.3788	41.1729	1240182	2	8	8
5	Sunitinib	NB1	0.756676	0.0147596	0.313349	0.0955007	0.999	18.0136	949179	2	8	8
5	Sunitinib	MFM-223	0.973616	0.00604437	3.57131	1.44844	0.0156	21.8682	910948	2	8	8
5	Sunitinib	SK-PN-DW	0.890066	0.011472	1.49914	1.34631	0.8092	21.004	909731	2	8	8
5	Sunitinib	OCI-M1	0.902767	0.00684185	0.679667	0.0253455	1	20.9313	1330985	2	8	8
5	Sunitinib	J-RT3-T3-5	0.923223	0.00898605	1.01228	0.705727	0.9002	36.8094	907391	2	8	8
5	Sunitinib	THP-1	0.915785	0.011177	3.17785	1.84568	0.3416	14.434	909771	2	8	8
5	Sunitinib	NCI-H510A	0.910846	0.0110581	2.14585	1.63915	0.6622	17.2501	753605	2	8	8
5	Sunitinib	GAK	0.943501	0.00675037	0.860137	0.163745	0.9926	23.4115	910932	2	8	8
5	Sunitinib	SHP-77	0.907056	0.012023	2.73187	1.85235	0.5076	11.2138	724872	2	8	8
5	Sunitinib	SW684	0.996078	0.000851115	3.62156	1.21459	0.0044	64.5575	909754	2	8	8
5	Sunitinib	IMR-5	0.932241	0.00856594	1.34703	1.01005	0.7608	35.7025	907170	2	8	8
5	Sunitinib	EW-12	0.946427	0.0093099	3.60157	1.32085	0.024	12.9365	949162	2	8	8
5	Sunitinib	SCC-3	0.827001	0.0107071	0.456657	0.0468977	1	13.5413	910930	2	8	8
5	Sunitinib	NOMO-1	0.819093	0.013986	0.678171	0.363511	0.9776	1.89784	908451	2	8	8
5	Sunitinib	K5	0.867014	0.01379	1.95021	1.56804	0.7198	6.05824	924238	2	8	8
5	Sunitinib	NKM-1	0.402468	0.0189668	-0.968843	0.133473	0.9942	-7.61634	908448	2	8	8
5	Sunitinib	HCC1187	0.936873	0.00934077	2.57682	1.84925	0.4168	36.3452	749711	2	8	8
5	Sunitinib	MKL-1-subclone-2	0.929348	0.0100885	2.45959	1.67994	0.5096	10.481	1333014	2	8	8
5	Sunitinib	BL-41	0.71389	0.0151466	0.320762	0.0491756	1	-7.38864	910706	2	8	8
5	Sunitinib	P31-FUJ	0.96435	0.00722845	3.80984	1.73754	0.0244	6.27765	909253	2	8	8
5	Sunitinib	WIL2-NS	0.810436	0.0114775	0.407614	0.0533155	1	-5.84827	1331049	2	8	8
5	Sunitinib	TE-441-T	0.965073	0.00652171	3.15397	1.95459	0.2408	6.4549	924248	2	8	8
5	Sunitinib	MMAC-SF	0.884964	0.0116191	0.852667	0.493478	0.9704	-1.30188	925339	2	8	8
5	Sunitinib	KP-N-YS	0.970428	0.00552341	1.99169	1.4414	0.4274	43.2273	946363	2	8	8
5	Sunitinib	SUP-T1	0.967094	0.00645899	3.31235	1.96478	0.175	21.6149	909743	2	8	8
5	Sunitinib	NCI-H1092	0.927983	0.0105986	3.24103	2.05732	0.3074	4.41886	687997	2	8	8
5	Sunitinib	DJM-1	0.987167	0.00306587	2.4848	1.4895	0.1752	26.1065	906841	2	8	8
5	Sunitinib	L-1236	0.79249	0.0154781	0.616946	0.0722629	0.999	-1.00891	1330935	2	8	8
5	Sunitinib	HEL	0.815726	0.0138544	0.546594	0.192908	0.9854	17.8703	907053	2	8	8
5	Sunitinib	NCI-H2126	0.946744	0.00852487	2.93469	1.86808	0.3382	3.0174	687814	2	8	8
5	Sunitinib	NCI-H847	0.863172	0.00974624	0.587786	0.0455214	1	22.1456	1240193	2	8	8
5	Sunitinib	SCLC-21H	0.966264	0.00700868	3.40647	1.81245	0.0834	7.24785	753611	2	8	8
5	Sunitinib	COLO-824	0.985969	0.00365554	3.00398	1.5769	0.0816	17.8151	906812	2	8	8
5	Sunitinib	CW-2	0.990292	0.00265399	3.45811	2.05846	0.0488	47.4274	910554	2	8	8
5	Sunitinib	A4-Fuk	0.672609	0.0169157	0.148536	0.0926397	0.998	1.2537	910934	2	8	8
5	Sunitinib	MHH-NB-11	0.919729	0.0104814	2.71411	1.76534	0.4304	21.9425	908135	2	8	8
5	Sunitinib	HCE-4	0.829008	0.0519124	0.576844	0.196285	0.9992	-8.6966	753559	2	8	8
5	Sunitinib	GR-ST	0.911515	0.011219	1.9089	1.52394	0.6668	26.9948	906877	2	8	8
5	Sunitinib	SU-DHL-8	0.785005	0.0139865	0.528705	0.0370894	1	-12.6623	1331038	2	8	8
5	Sunitinib	HT	0.97672	0.00506538	2.73938	1.6894	0.2348	22.9222	907063	2	8	8
5	Sunitinib	LP-1	0.960865	0.0061958	1.46959	1.05301	0.6636	34.4509	907791	2	8	8
5	Sunitinib	HT-144	0.870984	0.0122471	0.670922	0.0358133	1	-16.4057	907067	2	8	8
5	Sunitinib	NOS-1	0.320273	0.0180761	-1.34052	0.0516927	1	-19.2047	925345	2	8	8
5	Sunitinib	DG-75	0.8808	0.0119935	1.37874	1.22446	0.7914	24.7454	906838	2	8	8
5	Sunitinib	NCI-H2141	0.979373	0.00421839	2.14332	1.64129	0.3326	45.5572	688014	2	8	8
5	Sunitinib	HC-1	0.829921	0.0138211	1.05095	1.04831	0.887	11.4649	907044	2	8	8
5	Sunitinib	SNB75	0.765597	0.0215709	3.09724	1.9821	0.5342	-16.8302	905982	2	8	8
5	Sunitinib	MDA-MB-134-VI	0.996065	0.000846485	3.53477	1.38986	0.0028	64.5575	908119	2	8	8
5	Sunitinib	GI-1	0.765547	0.018224	0.93214	0.524423	0.9672	-13.2961	906871	2	8	8
5	Sunitinib	CP66-MEL	0.995408	0.00107272	3.36642	0.861558	0.005	55.1529	753546	2	8	8
5	Sunitinib	NB17	0.99022	0.00301895	2.82084	1.84895	0.0872	31.0611	949175	2	8	8
5	Sunitinib	DMS-79	0.970233	0.0064659	3.401	1.76997	0.096	19.2198	753551	2	8	8
5	Sunitinib	NCI-H1581	0.891886	0.0124912	2.33002	1.83147	0.6104	17.7378	908471	2	8	8
5	Sunitinib	Farage	0.827376	0.011401	0.533028	0.0411699	1	-1.5002	1297449	2	8	8
5	Sunitinib	U-698-M	0.95215	0.0082231	3.29541	1.88038	0.234	8.7233	909777	2	8	8
5	Sunitinib	EB2	0.929461	0.010409	3.50542	1.90654	0.2104	7.71768	906846	2	8	8
5	Sunitinib	GRANTA-519	0.981385	0.00416819	2.60136	1.64647	0.206	45.3131	1303897	2	8	8
5	Sunitinib	A498	0.996064	0.000860608	3.23926	0.868475	0.0042	64.5575	905948	2	8	8
5	Sunitinib	BB30-HNC	0.795334	0.0128145	0.312153	0.0556198	1	17.6514	753531	2	8	8
5	Sunitinib	YT	0.880262	0.0140398	2.82113	1.92182	0.5484	6.90014	946358	2	8	8
5	Sunitinib	RCC10RGB	0.93382	0.0112293	3.41241	1.23338	0.0198	6.33997	909974	2	8	8
5	Sunitinib	COR-L95	0.965453	0.00709835	3.42731	1.98741	0.1218	4.68218	1297439	2	8	8
5	Sunitinib	TC-71	0.994676	0.00131067	3.2085	1.34106	0.0266	56.8895	1240221	2	8	8
5	Sunitinib	CHP-126	0.986573	0.00376498	3.55491	1.30652	0.0124	10.9823	910567	2	8	8
5	Sunitinib	LC-1F	0.959938	0.00707373	2.17811	1.61293	0.4762	-1.59062	907785	2	8	8
5	Sunitinib	ARH-77	0.88045	0.0121044	1.38333	1.23567	0.842	10.5973	906765	2	8	8
5	Sunitinib	KP-N-YN	0.840297	0.0157516	2.53986	1.69282	0.648	4.52531	907314	2	8	8
5	Sunitinib	SBC-1	0.995325	0.00110729	3.63166	1.3132	0.006	50.2459	713885	2	8	8
5	Sunitinib	EW-3	0.907592	0.0103355	1.19227	1.11018	0.8434	34.3889	949161	2	8	8
5	Sunitinib	LB831-BLC	0.911238	0.00710108	0.70941	0.0289501	1	25.2503	753584	2	8	8
5	Sunitinib	KP-N-RT-BM-1	0.861312	0.0184735	0.911129	0.596088	0.9638	1.28259	924189	2	8	8
5	Sunitinib	MY-M12	0.868781	0.010296	0.58902	0.0436738	1	5.90593	1330960	2	8	8
5	Sunitinib	RS4-11	0.741389	0.0160939	0.29411	0.119651	0.9932	6.8706	909703	2	8	8
5	Sunitinib	BC-3	0.914718	0.0104	2.14025	1.61799	0.5942	24.905	910918	2	8	8
5	Sunitinib	SW954	0.860975	0.012266	0.659507	0.306162	0.9844	3.61946	924247	2	8	8
5	Sunitinib	BV-173	0.757519	0.015961	0.352401	0.0910721	0.9982	4.73224	910710	2	8	8
5	Sunitinib	RL95-2	0.721257	0.0201208	0.352006	0.0691674	0.9998	-16.3523	930082	2	8	8
5	Sunitinib	NCI-H719	0.953935	0.00711943	1.86084	1.41995	0.5622	24.2207	924242	2	8	8
5	Sunitinib	no-11	0.885812	0.0189676	1.03276	0.724669	0.9226	-12.8051	908450	2	8	8
5	Sunitinib	KALS-1	0.934217	0.00813433	1.13044	0.748014	0.8786	3.51125	907271	2	8	8
5	Sunitinib	EW-11	0.960219	0.00678206	2.27608	1.75022	0.4688	14.8382	684062	2	8	8
5	Sunitinib	D-247MG	0.883891	0.0137904	3.25748	1.90909	0.3488	10.3849	946367	2	8	8
5	Sunitinib	NCI-H1694	0.96995	0.00550184	1.8902	1.4267	0.4726	43.1834	688006	2	8	8
5	Sunitinib	IST-MEL1	0.806351	0.014982	0.674855	0.0554295	1	-4.2208	907172	2	8	8
5	Sunitinib	MV-4-11	0.212009	0.0131913	-1.36958	0.031393	1	-35.6536	908156	2	8	8
5	Sunitinib	MOLP-8	0.811362	0.0111649	0.430662	0.0480566	1	18.6905	1330950	2	8	8
5	Sunitinib	LB2241-RCC	0.83262	0.0161623	2.89246	1.80487	0.5554	0.51464	753578	2	8	8
5	Sunitinib	ES8	0.865106	0.0246418	0.570758	0.0807495	1	3.54039	949155	2	8	8
5	Sunitinib	KS-1	0.743958	0.0197052	0.23147	0.0573369	0.9998	-14.1281	907313	2	8	8
5	Sunitinib	KY821	0.803612	0.0148242	0.588085	0.0852516	0.9986	9.23848	907300	2	8	8
5	Sunitinib	DMS-153	0.994711	0.00128122	3.30613	1.82026	0.0312	56.7656	687984	2	8	8
5	Sunitinib	no-10	0.929567	0.00980777	1.10092	0.693057	0.9022	-8.66707	908452	2	8	8
5	Sunitinib	KLE	0.948955	0.00798266	2.01525	1.5422	0.5416	11.6752	924187	2	8	8
5	Sunitinib	SW982	0.77168	0.0171756	0.457621	0.0815896	0.9996	-11.3494	909759	2	8	8
5	Sunitinib	LB647-SCLC	0.995378	0.00117988	3.12112	1.35885	0.0186	45.2546	753582	2	8	8
5	Sunitinib	D-263MG	0.981187	0.00417775	2.9689	1.79948	0.165	26.4335	946368	2	8	8
5	Sunitinib	SU-DHL-16	0.80631	0.00989251	0.410882	0.0334959	1	7.43695	1331034	2	8	8
5	Sunitinib	HDLM-2	0.791518	0.016713	1.04083	0.895537	0.9272	3.67253	924110	2	8	8
5	Sunitinib	A704	0.920592	0.0104121	2.06841	1.61078	0.6044	16.1198	910920	2	8	8
5	Sunitinib	NB5	0.876199	0.0135873	2.84718	1.89365	0.5498	3.98927	949176	2	8	8
5	Sunitinib	A253	0.993469	0.00170562	3.06127	1.49411	0.0512	38.118	906794	2	8	8
5	Sunitinib	KE-37	0.825118	0.0134384	0.675726	0.378495	0.9706	21.793	907277	2	8	8
5	Sunitinib	NCI-H187	0.962634	0.00767376	2.82388	1.65889	0.2112	13.4041	688007	2	8	8
5	Sunitinib	JVM-2	0.949925	0.0083382	2.82279	1.91376	0.3208	20.4187	907269	2	8	8
5	Sunitinib	NCI-H1869	0.950629	0.00798711	2.45053	1.62618	0.4162	29.306	1240183	2	8	8
5	Sunitinib	EKVX	0.99468	0.00133284	3.38822	1.48268	0.0072	45.9878	905970	2	8	8
5	Sunitinib	NCI-H446	0.927175	0.0101526	2.61814	1.87716	0.504	6.35879	688023	2	8	8
5	Sunitinib	P3HR-1	0.867204	0.0109825	0.612621	0.0650148	0.9996	15.1283	1330988	2	8	8
5	Sunitinib	CMK	0.785862	0.0136133	0.314109	0.0726814	0.9998	25.0292	910566	2	8	8
5	Sunitinib	ES5	0.93015	0.0101351	2.53175	1.75752	0.5042	7.20873	684057	2	8	8
5	Sunitinib	ES4	0.822991	0.0125033	0.484002	0.0583312	1	24.1711	949156	2	8	8
5	Sunitinib	TGBC1TKB	0.776974	0.021747	0.786136	0.203929	0.9978	-23.4374	909769	2	8	8
5	Sunitinib	NMC-G1	0.941692	0.00812762	1.49816	1.26875	0.7516	8.03306	908449	2	8	8
5	Sunitinib	SK-NEP-1	0.798214	0.0134276	0.428315	0.0801674	0.9984	17.686	909730	2	8	8
5	Sunitinib	KNS-42	0.993102	0.0018066	3.00758	1.70237	0.062	43.1635	907282	2	8	8
5	Sunitinib	SNU-C1	0.982698	0.00636077	2.79407	1.73136	0.1522	39.182	910905	2	8	8
5	Sunitinib	CCRF-CEM	0.843723	0.0124401	0.650203	0.0362562	1	-11.3424	905952	2	8	8
5	Sunitinib	Toledo	0.803061	0.015014	0.620395	0.284983	0.9838	1.74781	1331046	2	8	8
5	Sunitinib	RL	0.96099	0.00771586	3.46785	1.74349	0.1166	12.4131	910861	2	8	8
5	Sunitinib	NCI-H2081	0.99288	0.00190445	3.01884	1.88874	0.056	43.9834	908480	2	8	8
5	Sunitinib	SK-UT-1	0.940486	0.0094219	2.15939	1.6747	0.5328	-0.93685	909732	2	8	8
5	Sunitinib	RPMI-8226	0.849316	0.0141456	1.21779	1.0165	0.8958	7.34171	905964	2	8	8
5	Sunitinib	DND-41	0.783458	0.0139382	0.505093	0.0457106	1	-6.40662	1297446	2	8	8
5	Sunitinib	WSU-DLCL2	0.995369	0.00117059	3.63886	1.83231	0.0142	46.0356	1331050	2	8	8
5	Sunitinib	NCI-H226	0.978798	0.00482893	3.0988	1.8655	0.1262	31.6067	905941	2	8	8
5	Sunitinib	DU-4475	0.775021	0.0146769	0.494971	0.0480042	1	-10.2669	906844	2	8	8
5	Sunitinib	SU-DHL-4	0.813458	0.0102907	0.44807	0.0350961	1	16.4829	1331035	2	8	8
5	Sunitinib	HA7-RCC	0.849419	0.011786	0.639746	0.0633138	1	4.05595	753558	2	8	8
5	Sunitinib	KINGS-1	0.814964	0.0316965	1.84924	1.55374	0.788	-25.6432	907279	2	8	8
5	Sunitinib	SK-MEL-1	0.955942	0.00587635	0.950139	0.371159	0.973	35.0401	909723	2	8	8
5	Sunitinib	BC-1	0.880852	0.0125737	1.37318	1.12951	0.8354	23.0852	910919	2	8	8
5	Sunitinib	P32-ISH	0.83552	0.0125843	0.487448	0.0418685	1	-11.0342	1330987	2	8	8
5	Sunitinib	NB14	0.943536	0.00888203	1.97183	1.45642	0.5384	35.7053	949178	2	8	8
5	Sunitinib	PSN1	0.747167	0.0110782	0.226149	0.0398652	1	3.06625	910546	2	8	8
5	Sunitinib	LAMA-84	0.779631	0.0150071	0.403985	0.164303	0.9914	16.9097	907783	2	8	8
5	Sunitinib	JVM-3	0.996008	0.000898385	3.39081	1.26929	0.0038	64.5575	907270	2	8	8
5	Sunitinib	HCC2157	0.940725	0.00953486	3.23847	1.9113	0.2942	8.13438	749715	2	8	8
5	Sunitinib	CTB-1	0.857036	0.0141375	2.17276	1.65084	0.692	13.3794	949088	2	8	8
5	Sunitinib	OPM-2	0.837573	0.0107208	0.494867	0.0471251	1	26.6738	909249	2	8	8
5	Sunitinib	NK-92MI	0.746543	0.017551	0.418925	0.0659589	1	-22.2449	1330981	2	8	8
5	Sunitinib	NCI-H2196	0.945315	0.00913427	3.13688	1.92625	0.3108	6.06504	908481	2	8	8
5	Sunitinib	NCI-H1876	0.944768	0.00834225	2.3308	1.77011	0.513	19.7909	1330972	2	8	8
5	Sunitinib	COR-L279	0.933184	0.00883942	1.67156	1.42848	0.6452	28.4451	910937	2	8	8
5	Sunitinib	COR-L88	0.900449	0.0119062	2.28825	1.70637	0.6342	3.8765	906808	2	8	8
5	Sunitinib	A101D	0.794272	0.0204093	0.444135	0.0824682	0.9984	-3.204	910921	2	8	8
5	Sunitinib	BOKU	0.937645	0.0103183	3.10111	1.96297	0.26	-7.29313	753536	2	8	8
5	Sunitinib	NCI-H1395	0.98688	0.00414613	3.54233	1.56347	0.0288	31.2929	684681	2	8	8
5	Sunitinib	D-502MG	0.986653	0.00384662	3.49156	1.37168	0.0092	25.7066	946373	2	8	8
5	Sunitinib	SK-MEL-2	0.924532	0.0164002	2.56848	1.8115	0.3928	3.25453	905955	2	8	8
5	Sunitinib	NALM-6	0.793849	0.0144963	0.459972	0.0934145	0.9988	11.8535	908158	2	8	8
5	Sunitinib	L-428	0.891464	0.0124273	2.30132	1.77252	0.628	10.7572	907322	2	8	8
5	Sunitinib	RXF393	0.836689	0.01378	0.697448	0.0582308	0.9996	2.41828	905978	2	8	8
5	Sunitinib	KGN	0.727298	0.0168425	0.440259	0.110783	0.9974	0.892865	924186	2	8	8
5	Sunitinib	EW-1	0.803924	0.0137819	0.530595	0.0574614	1	3.51254	949163	2	8	8
5	Sunitinib	ETK-1	0.652337	0.0176442	0.177474	0.0991509	0.9968	-2.03823	906861	2	8	8
5	Sunitinib	ES6	0.581861	0.0231161	-0.328045	0.323345	0.9852	-22.0032	949157	2	8	8
5	Sunitinib	CP67-MEL	0.836654	0.0170854	0.555023	0.0676422	1	-8.08214	949092	2	8	8
5	Sunitinib	TUR	0.976087	0.00508021	3.60581	2.02075	0.0724	15.5982	909773	2	8	8
5	Sunitinib	NCI-H1975	0.851804	0.0128892	0.744677	0.543237	0.95	20.8501	924244	2	8	8
5	Sunitinib	Daudi	0.811127	0.015707	0.725279	0.229424	0.9952	5.02949	906831	2	8	8
5	Sunitinib	JM1	0.897841	0.0109564	1.06598	0.864902	0.891	9.8951	1327768	2	8	8
5	Sunitinib	NCI-H1417	0.993415	0.00179682	3.26584	1.54214	0.0054	42.492	688001	2	8	8
5	Sunitinib	NB10	0.986942	0.00347453	3.57116	1.08718	0.0084	20.5192	949171	2	8	8
5	Sunitinib	LC4-1	0.876101	0.0111835	0.704613	0.275316	0.9864	31.9007	907787	2	8	8
5	Sunitinib	H-EMC-SS	0.823529	0.0131489	0.46736	0.0735252	0.9998	26.6276	907290	2	8	8
5	Sunitinib	IST-MES1	0.94623	0.00756668	1.59835	1.29135	0.6648	28.7412	907173	2	8	8
5	Sunitinib	REH	0.88212	0.013141	2.86786	1.92845	0.5112	5.82679	909696	2	8	8
5	Sunitinib	CPC-N	0.834279	0.0171242	2.17108	1.63489	0.7278	-3.97706	753547	2	8	8
5	Sunitinib	OCI-LY-19	0.703452	0.0148939	0.089361	0.0713766	0.9996	2.45958	1330984	2	8	8
5	Sunitinib	D-336MG	0.924489	0.0112346	3.05288	1.86396	0.1968	-3.97141	946369	2	8	8
5	Sunitinib	DOHH-2	0.715337	0.0139274	0.275257	0.0458319	1	-4.31836	906842	2	8	8
5	Sunitinib	OS-RC-2	0.821831	0.0149983	0.757281	0.213369	0.9934	13.0665	909250	2	8	8
5	Sunitinib	SIG-M5	0.731997	0.00926964	0.187667	0.032227	1	18.1846	909715	2	8	8
5	Sunitinib	Mo-T	0.992878	0.00227208	3.04408	0.911575	0.0056	45.4438	908149	2	8	8
5	Sunitinib	ECC4	0.952651	0.00838796	3.04807	1.8654	0.2882	15.675	906850	2	8	8
5	Sunitinib	K-562	0.935373	0.0073689	0.851384	0.232368	0.9876	34.7629	905940	2	8	8
5	Sunitinib	TGW	0.874699	0.0118104	0.779266	0.11651	0.9974	3.58934	910780	2	8	8
5	Sunitinib	KARPAS-422	0.856576	0.0102629	0.617112	0.0327951	1	-0.0937154	907274	2	8	8
5	Sunitinib	NB69	0.889856	0.0135356	2.9681	1.88646	0.4692	4.55277	908440	2	8	8
5	Sunitinib	KARPAS-45	0.814275	0.0108789	0.425347	0.0418288	1	23.5597	907272	2	8	8
5	Sunitinib	LB373-MEL-D	0.976738	0.00562728	3.55651	1.84079	0.0594	13.5013	753581	2	8	8
5	Sunitinib	MN-60	0.933976	0.00834825	1.21803	0.908884	0.7928	38.0771	908143	2	8	8
5	Sunitinib	MZ7-mel	0.909239	0.00933452	0.791418	0.042559	0.9994	-9.70568	753596	2	8	8
5	Sunitinib	BB49-HNC	0.780514	0.0169112	0.592388	0.120392	0.9956	-0.337308	753532	2	8	8
5	Sunitinib	COLO-320-HSR	0.877695	0.0182227	0.615623	0.0696685	1	8.87097	910569	2	8	8
5	Sunitinib	P30-OHK	0.901712	0.0129694	2.96347	1.87965	0.4524	10.8683	909252	2	8	8
5	Sunitinib	OCUB-M	0.920417	0.0103542	1.23201	1.02947	0.8092	20.4428	909256	2	8	8
5	Sunitinib	NCI-H748	0.984649	0.00445346	3.21251	1.39369	0.053	21.1616	909194	2	8	8
5	Sunitinib	TE-6	0.963703	0.0156564	2.77763	1.79376	0.283	17.6684	946355	2	8	8
5	Sunitinib	DEL	0.720107	0.0139679	0.268993	0.0673732	1	-12.0743	906836	2	8	8
5	Sunitinib	SNU-C2B	0.992264	0.00278059	2.92785	1.98902	0.0452	21.6659	909740	2	8	8
5	Sunitinib	SU-DHL-6	0.782128	0.0118137	0.376907	0.0518381	1	14.2264	1331037	2	8	8
5	Sunitinib	TE-5	0.991987	0.00234694	2.60439	1.51681	0.084	32.1378	735784	2	8	8
5	Sunitinib	SCH	0.957546	0.00778543	2.90996	1.83557	0.2726	37.5246	909711	2	8	8
5	Sunitinib	NCI-H2171	0.957659	0.00758451	3.14281	1.9697	0.252	4.78325	688015	2	8	8
5	Sunitinib	LB2518-MEL	0.969174	0.00723532	3.31969	1.86005	0.045	23.0821	753579	2	8	8
5	Sunitinib	SIMA	0.993209	0.00155745	3.14418	1.72627	0.0434	39.4118	753620	2	8	8
5	Sunitinib	DSH1	0.996073	0.000848311	3.329	1.28562	0.0052	64.5575	753552	2	8	8
5	Sunitinib	MC116	0.906199	0.00892764	0.71765	0.0503687	0.9994	33.9623	907799	2	8	8
5	Sunitinib	ME-1	0.813545	0.0171463	2.75853	1.78678	0.6156	2.40838	1330942	2	8	8
5	Sunitinib	A388	0.860877	0.0248842	2.66563	1.81663	0.593	-2.13561	910697	2	8	8
5	Sunitinib	SJSA-1	0.907005	0.0102987	1.19316	0.998942	0.8452	18.6607	909717	2	8	8
5	Sunitinib	OMC-1	0.973123	0.00523606	2.15965	1.53853	0.3888	22.3951	949154	2	8	8
5	Sunitinib	LS-123	0.872142	0.013197	1.44771	1.19691	0.8322	-1.70536	907792	2	8	8
5	Sunitinib	TE-15	0.586564	0.0183931	-0.385265	0.132737	0.9964	-3.72689	753614	2	8	8
5	Sunitinib	A3-KAW	0.738882	0.0143969	0.213782	0.0722665	1	18.3848	910935	2	8	8
5	Sunitinib	ROS-50	0.914616	0.0117156	2.8314	1.79131	0.4534	5.75973	1331025	2	8	8
5	Sunitinib	LAN-6	0.890951	0.0126533	1.9001	1.48777	0.7408	2.19402	949170	2	8	8
5	Sunitinib	Becker	0.99529	0.0011478	3.87687	1.55886	0.0052	51.9711	906746	2	8	8
5	Sunitinib	SW962	0.948461	0.00755542	1.56697	1.2406	0.6662	1.48773	909758	2	8	8
5	Sunitinib	HSC-39	0.774492	0.0132411	0.334326	0.0624996	0.9996	-3.22565	1322224	2	8	8
5	Sunitinib	CGTH-W-1	0.440447	0.0216388	-1.29624	0.0633415	1	-16.3273	910568	2	8	8
5	Sunitinib	NCI-H128	0.864273	0.0163978	2.10034	1.69206	0.6624	1.61219	753597	2	8	8
5	Sunitinib	WSU-NHL	0.959677	0.00761593	3.43056	1.90794	0.1776	12.733	909785	2	8	8
5	Sunitinib	LS-513	0.950496	0.00826802	2.96802	1.80906	0.3042	13.3323	907795	2	8	8
5	Sunitinib	CAL-148	0.996102	0.000852301	3.48571	1.18046	0.0034	64.5575	924106	2	8	8
5	Sunitinib	GI-ME-N	0.981984	0.00580325	3.3266	1.09351	0.0056	33.7262	906872	2	8	8
5	Sunitinib	TE-12	0.615432	0.0187527	-0.127057	0.115747	0.9958	1.43343	946356	2	8	8
5	Sunitinib	EJM	0.949155	0.0080006	2.50957	1.64077	0.4126	25.4921	1297447	2	8	8
5	Sunitinib	MOLM-13	0.200714	0.0120681	-1.37795	0.0300572	1	-38.1009	1330947	2	8	8
5	Sunitinib	SUP-M2	0.896337	0.0093195	0.64198	0.0500342	0.9994	25.6754	1331040	2	8	8
5	Sunitinib	Tera-1	0.885065	0.0123217	1.88073	1.4566	0.716	4.63745	1331043	2	8	8
5	Sunitinib	VA-ES-BJ	0.945835	0.00741539	1.04859	0.581887	0.8854	14.6531	688121	2	8	8
5	Sunitinib	Calu-6	0.993067	0.00167289	3.05665	1.65893	0.0434	37.3718	724859	2	8	8
5	Sunitinib	LNCaP-Clone-FGC	0.938392	0.00966532	3.36524	1.93009	0.214	6.59288	907788	2	8	8
5	Sunitinib	NU-DUL-1	0.862981	0.0114051	0.606242	0.0667624	1	11.2639	1330982	2	8	8
5	Sunitinib	TE-8	0.798739	0.0131559	0.393735	0.0740268	0.9998	-11.3243	753623	2	8	8
5	Sunitinib	NCI-H1385	0.969864	0.00609854	2.98649	1.90579	0.2262	5.77379	1330965	2	8	8
5	Sunitinib	C2BBe1	0.988296	0.00327651	3.49622	1.43949	0.0078	8.96824	910700	2	8	8
5	Sunitinib	KM12	0.566272	0.0173284	-0.56704	0.0864093	0.9976	5.14852	905989	2	8	8
5	Sunitinib	L-363	0.866057	0.0119264	0.724528	0.426249	0.973	8.94938	924239	2	8	8
5	Sunitinib	KARPAS-231	0.79507	0.011479	0.367332	0.046536	1	17.2306	1327774	2	8	8
5	Sunitinib	Hs-445	0.842438	0.0151407	1.39281	1.23665	0.8694	3.65224	1322218	2	8	8
5	Sunitinib	ONS-76	0.911323	0.0101254	1.4894	1.23528	0.7472	23.8235	909248	2	8	8
5	Sunitinib	LB1047-RCC	0.644906	0.0175619	0.087705	0.102857	0.9972	-6.44328	753577	2	8	8
5	Sunitinib	TE-1	0.853108	0.0148957	2.07393	1.64842	0.7452	4.28855	753621	2	8	8
5	Sunitinib	SF268	0.828486	0.0129114	0.486684	0.0868122	0.9988	2.6499	905986	2	8	8
5	Sunitinib	TALL-1	0.857304	0.0133065	1.26991	1.0824	0.8838	6.82164	909762	2	8	8
5	Sunitinib	MFH-ino	0.948117	0.00975511	3.24992	1.45793	0.035	1.86513	925343	2	8	8
5	Sunitinib	KU812	0.842756	0.0124067	0.611944	0.050103	1	4.32657	907311	2	8	8
5	Sunitinib	IST-SL2	0.828384	0.013579	0.657333	0.0739606	0.999	3.06827	753565	2	8	8
5	Sunitinib	RF-48	0.858689	0.0160377	1.61284	1.44379	0.787	-0.63087	909697	2	8	8
5	Sunitinib	NCI-H747	0.797906	0.0186471	0.494594	0.0649338	1	-15.5034	908457	2	8	8
5	Sunitinib	ES3	0.942891	0.00876317	2.74142	1.69705	0.3628	14.7816	684055	2	8	8
5	Sunitinib	MZ2-MEL	0.934877	0.00857051	1.37827	1.14105	0.8046	3.44509	971777	2	8	8
5	Sunitinib	NCI-H1155	0.971105	0.00572679	3.23828	1.86706	0.174	10.6699	908467	2	8	8
5	Sunitinib	ATN-1	0.824208	0.0125268	0.523877	0.0648567	1	18.0348	910687	2	8	8
5	Sunitinib	LB771-HNC	0.97604	0.00702978	3.40711	1.77872	0.0736	-1.30612	753583	2	8	8
5	Sunitinib	NCI-H345	0.994637	0.00129538	3.29903	2.08323	0.03	56.5566	688021	2	8	8
5	Sunitinib	COLO-668	0.956641	0.00758713	2.74736	1.71947	0.2752	39.3949	910692	2	8	8
5	Sunitinib	NH-12	0.980707	0.00408471	2.74352	1.94277	0.2288	24.5251	908447	2	8	8
5	Sunitinib	NB6	0.977526	0.00519069	2.65592	1.65423	0.2164	44.1462	949173	2	8	8
5	Sunitinib	MRK-nu-1	0.948595	0.00660068	0.919957	0.286869	0.9664	35.9996	908151	2	8	8
5	Sunitinib	JSC-1	0.860271	0.00951417	0.583019	0.0360939	1	18.3551	1327769	2	8	8
5	Sunitinib	NCI-H1522	0.952476	0.00746077	1.71608	1.31997	0.6722	0.126706	908464	2	8	8
5	Sunitinib	MPP-89	0.909399	0.0152876	1.65145	1.24528	0.7172	-19.4717	908150	2	8	8
5	Sunitinib	SF539	0.642091	0.0276847	0.246243	0.106595	1	-21.4024	905984	2	8	8
5	Sunitinib	NB(TU)1-10	0.793732	0.0145285	0.493897	0.0533971	1	4.18685	1240181	2	8	8
5	Sunitinib	SH-4	0.820267	0.0130929	0.548951	0.0433604	1	-9.54863	909713	2	8	8
5	Sunitinib	NCI-SNU-1	0.925442	0.00993171	2.25817	1.70188	0.5504	31.4834	908444	2	8	8
5	Sunitinib	LU-139	0.988477	0.00283545	2.92503	1.45803	0.0928	33.9503	713878	2	8	8
5	Sunitinib	JJN-3	0.862191	0.0125388	0.74212	0.0484983	1	-1.30063	1327766	2	8	8
5	Sunitinib	SK-ES-1	0.771079	0.0140679	0.265533	0.0846442	0.9992	22.2012	684072	2	8	8
5	Sunitinib	EB-3	0.823833	0.0161274	2.13196	1.545	0.7416	4.97541	906847	2	8	8
5	Sunitinib	EC-GI-10	0.995699	0.000980018	3.58463	1.63491	0.0028	58.9914	753555	2	8	8
5	Sunitinib	TE-10	0.717983	0.0182884	0.416426	0.105185	0.9968	0.649433	753622	2	8	8
5	Sunitinib	NEC8	0.971787	0.00559178	2.01291	1.71872	0.426	43.9178	910942	2	8	8
5	Sunitinib	HAL-01	0.71904	0.0170113	0.335945	0.0833101	0.999	0.650694	949153	2	8	8
5	Sunitinib	NCI-H716	0.939155	0.0094134	3.16513	1.95571	0.3196	17.6842	908458	2	8	8
5	Sunitinib	ES-2	0.926069	0.00910955	1.26639	1.01434	0.8148	11.9714	1240128	2	8	8
5	Sunitinib	IM-9	0.990133	0.00266413	3.58158	1.65269	0.0066	27.5493	753563	2	8	8
5	Sunitinib	L-540	0.804173	0.017676	0.555887	0.056154	1	-17.4054	907323	2	8	8
5	Sunitinib	COLO-684	0.96711	0.00614637	3.08722	1.8426	0.2304	11.4693	910691	2	8	8
5	Sunitinib	LOXIMVI	0.945954	0.00818915	1.90827	1.4762	0.6174	6.98128	905974	2	8	8
5	Sunitinib	PL-21	0.741012	0.0187301	0.703763	0.59799	0.9522	0.168472	1330991	2	8	8
5	Sunitinib	BE-13	0.84453	0.0112651	0.523089	0.0528648	1	27.3261	906763	2	8	8
5	Sunitinib	MONO-MAC-6	0.323235	0.0191044	-1.2756	0.0662713	1	-15.0374	908148	2	8	8
5	Sunitinib	AM-38	0.987585	0.00318386	3.11784	1.64903	0.07	35.2853	910933	2	8	8
5	Sunitinib	QIMR-WIL	0.842351	0.0127326	0.544961	0.0867584	0.9982	19.1753	910545	2	8	8
5	Sunitinib	BB65-RCC	0.893707	0.0100271	0.724846	0.0467908	1	-5.40901	753533	2	8	8
5	Sunitinib	ML-2	0.765448	0.0162949	0.410501	0.122135	0.9946	5.08967	908141	2	8	8
5	Sunitinib	EVSA-T	0.926217	0.0128186	0.809034	0.209155	0.9908	30.1482	906862	2	8	8
5	Sunitinib	SK-LMS-1	0.863642	0.0146072	0.574006	0.0569341	0.9998	-1.63399	909720	2	8	8
5	Sunitinib	OCI-AML3	0.93679	0.00782276	1.10094	0.869556	0.8672	37.5626	1290455	2	8	8
5	Sunitinib	SUP-HD1	0.819123	0.0148874	0.653972	0.111635	0.998	2.6053	1331039	2	8	8
5	Sunitinib	EoL-1-cell	0.18745	0.011528	-1.40581	0.0283251	1	-51.7406	906856	2	8	8
5	Sunitinib	MOLT-4	0.829167	0.0127831	0.535292	0.0712522	0.9992	9.28515	905958	2	8	8
5	Sunitinib	NCI-H1666	0.988285	0.0027372	3.21656	1.59001	0.0614	25.0617	908473	2	8	8
5	Sunitinib	GB-1	0.611114	0.0288256	-0.100488	0.192378	0.997	-15.2571	687568	2	8	8
5	Sunitinib	CAS-1	0.947318	0.00953125	3.18797	1.66804	0.185	2.89285	910943	2	8	8
5	Sunitinib	NCI-H220	0.957748	0.00627755	1.45175	1.06954	0.7042	16.8319	1330974	2	8	8
5	Sunitinib	TE-9	0.959013	0.00693572	2.5682	1.79379	0.364	27.3289	946353	2	8	8
5	Sunitinib	LU-165	0.951474	0.00865057	3.27759	1.66518	0.1212	6.96306	753589	2	8	8
5	Sunitinib	LC-2-ad	0.620869	0.0244021	0.0606849	0.149836	0.995	-10.2594	907786	2	8	8
5	Sunitinib	ES7	0.888629	0.0126117	2.93767	1.78922	0.474	11.5931	684059	2	8	8
5	Sunitinib	NTERA-S-cl-D1	0.877296	0.00871289	0.620182	0.0321903	1	0.721032	908454	2	8	8
5	Sunitinib	COLO-829	0.980797	0.00607221	3.37936	1.35049	0.0064	31.9829	687448	2	8	8
5	Sunitinib	LXF-289	0.815463	0.0127705	0.46373	0.0518446	1	-5.19525	753592	2	8	8
5	Sunitinib	HOP-62	0.829079	0.013688	0.652803	0.107608	0.9998	12.4273	905972	2	8	8
5	Sunitinib	LS-1034	0.980044	0.00525103	3.09508	1.80376	0.1468	37.221	917486	2	8	8
5	Sunitinib	KOPN-8	0.816215	0.013826	0.614649	0.0677115	0.9998	1.55428	1330933	2	8	8
5	Sunitinib	MC-CAR	0.918933	0.00966475	1.54577	1.35029	0.7432	16.1259	683665	2	8	8
5	Sunitinib	EHEB	0.915287	0.0112281	2.65971	1.92162	0.5402	5.35372	906854	2	8	8
5	Sunitinib	SLVL	0.924021	0.00973804	1.41021	1.14967	0.7794	13.3335	1331032	2	8	8
5	Sunitinib	697	0.580467	0.0139647	-0.174184	0.0492767	1	-0.361676	906800	2	8	8
5	Sunitinib	SK-N-DZ	0.889573	0.0104124	0.696279	0.0687221	0.9996	31.9311	688086	2	8	8
5	Sunitinib	NBsusSR	0.667099	0.0150174	0.104972	0.0739747	1	8.60001	925342	2	8	8
5	Sunitinib	BT-474	0.96431	0.00685387	3.49701	1.79482	0.128	8.20492	946359	2	8	8
5	Sunitinib	LU-134-A	0.935079	0.00964994	2.85465	1.86097	0.4226	9.2405	753588	2	8	8
5	Sunitinib	EW-13	0.955833	0.00768702	3.06574	1.93275	0.282	13.4472	949166	2	8	8
5	Sunitinib	ACN	0.865365	0.00828163	0.566785	0.0295225	1	14.7831	906803	2	8	8
5	Sunitinib	RPMI-6666	0.842795	0.0125994	0.584528	0.129	0.9948	27.5148	909701	2	8	8
5	Sunitinib	HL-60	0.837808	0.013201	0.641514	0.10093	0.9962	5.43525	905938	2	8	8
5	Sunitinib	BL-70	0.647047	0.014806	0.0504008	0.0626015	1	2.479	910707	2	8	8
5	Sunitinib	SK-MM-2	0.881914	0.0111025	0.857835	0.629383	0.9506	9.08989	753612	2	8	8
5	Sunitinib	KURAMOCHI	0.941611	0.00691555	0.90531	0.440735	0.9884	12.5136	909975	2	8	8
5	Sunitinib	KARPAS-620	0.774166	0.0145675	0.431199	0.0537268	1	-9.28035	1327775	2	8	8
5	Sunitinib	NCI-H524	0.980983	0.00423729	2.72668	1.55698	0.181	27.6332	908483	2	8	8
5	Sunitinib	NCI-SNU-16	0.753541	0.012861	0.201062	0.0553199	1	16.4879	908446	2	8	8
5	Sunitinib	NCI-H64	0.995288	0.0011046	3.38401	0.894787	0.0032	53.3076	688026	2	8	8
5	Sunitinib	SKM-1	0.987857	0.00309321	3.01494	1.8402	0.0978	42.8039	909722	2	8	8
5	Sunitinib	ALL-SIL	0.654075	0.0161664	0.0731297	0.0680669	0.9996	-2.52717	1295740	2	8	8
5	Sunitinib	COLO-800	0.995453	0.00111809	3.73626	1.9935	0.005	55.8101	906813	2	8	8
5	Sunitinib	SU-DHL-1	0.762023	0.00858762	0.300573	0.028062	1	9.53013	909742	2	8	8
5	Sunitinib	MEC-1	0.827621	0.0123752	0.499374	0.0686329	0.9998	22.4258	1330943	2	8	8
5	Sunitinib	MHH-PREB-1	0.886142	0.0113372	0.808892	0.47427	0.969	20.7054	908136	2	8	8
5	Sunitinib	TF-1	0.964043	0.00693278	3.05312	1.80017	0.2424	3.61449	1331044	2	8	8
5	Sunitinib	EW-24	0.993872	0.00150113	3.0569	1.33782	0.035	47.3881	949168	2	8	8
5	Sunitinib	DMS-114	0.965897	0.00632747	2.98224	1.73733	0.2274	9.33079	687983	2	8	8
5	Sunitinib	GA-10	0.565067	0.0146566	-0.184101	0.0549793	1	-8.69326	1303896	2	8	8
5	Sunitinib	KARPAS-299	0.757199	0.0148415	0.333347	0.119395	0.9938	10.8456	907273	2	8	8
5	Sunitinib	MKL-2	0.797791	0.0227847	0.636915	0.0944104	1	-11.2389	1333015	2	8	8
6	PHA-665752	EB-3	0.988334	0.0031417	3.04082	1.87792	0.0076	23.0721	906847	2	2	8
6	PHA-665752	KMS-12-BM	0.978657	0.00482467	3.32501	1.71756	0.0118	22.7884	907281	2	2	8
6	PHA-665752	SR	0.984661	0.00381885	2.7226	1.71112	0.0782	29.5429	905965	2	2	8
6	PHA-665752	NB1	0.99111	0.00219278	2.56124	1.55216	0.051	27.6456	949179	2	2	8
6	PHA-665752	SKM-1	0.936837	0.00955911	2.89142	1.89685	0.1878	6.84555	909722	2	2	8
6	PHA-665752	CW-2	0.901922	0.0129101	2.77459	1.91784	0.3046	-1.22527	910554	2	2	8
6	PHA-665752	QIMR-WIL	0.994931	0.00120733	3.33577	1.64053	0.007	48.1018	910545	2	2	8
6	PHA-665752	Kasumi-3	0.877425	0.018572	2.52998	1.88555	0.397	-8.93511	1327776	2	2	8
6	PHA-665752	SK-ES-1	0.994418	0.00134212	2.66579	1.55641	0.0272	50.0413	684072	2	2	8
6	PHA-665752	SW872	0.827896	0.021406	2.43035	1.98283	0.4228	-17.2029	909756	2	2	8
6	PHA-665752	MFM-223	0.974261	0.00617555	2.90696	1.39566	0.0086	24.1972	910948	2	2	8
6	PHA-665752	KELLY	0.994507	0.00132608	2.59154	1.41183	0.0182	49.9769	753618	2	2	8
6	PHA-665752	NB69	0.990774	0.00254629	2.9187	1.65602	0.0062	30.3333	908440	2	2	8
6	PHA-665752	BE2-M17	0.979368	0.00469772	2.23194	1.63713	0.166	44.7458	753616	2	2	8
6	PHA-665752	L-428	0.99281	0.00197509	2.86885	1.67317	0.006	38.8315	907322	2	2	8
6	PHA-665752	NCI-H2081	0.993526	0.00150701	2.61107	1.71208	0.0276	36.2501	908480	2	2	8
6	PHA-665752	NCI-H747	0.986049	0.00377297	2.70793	1.48883	0.0284	16.0937	908457	2	2	8
6	PHA-665752	MDST8	0.991402	0.00238731	2.68513	1.2712	0.0064	36.5105	1240173	2	2	8
6	PHA-665752	AMO-1	0.996049	0.00088544	3.05537	1.87015	0.0032	64.5575	1295741	2	2	8
6	PHA-665752	HD-MY-Z	0.994733	0.00117951	2.74666	1.53401	0.022	51.4148	907050	2	2	8
6	PHA-665752	NCI-H1436	0.987777	0.00375541	2.72169	1.55732	0.0316	14.0062	908469	2	2	8
6	PHA-665752	MHH-PREB-1	0.99537	0.00113403	2.74319	0.94878	0.0046	56.0154	908136	2	2	8
6	PHA-665752	HUTU-80	0.995559	0.00111466	3.36767	1.80534	0.0034	48.9349	907073	2	2	8
6	PHA-665752	BB65-RCC	0.987592	0.00403288	2.42933	1.39395	0.0576	16.4428	753533	2	2	8
6	PHA-665752	SF126	0.990268	0.00306487	2.65332	0.874167	0.0064	21.8801	909712	2	2	8
6	PHA-665752	TE-11	0.908085	0.0210595	2.29547	1.92268	0.4516	-10.6465	946354	2	2	8
6	PHA-665752	EW-12	0.993817	0.00161704	2.61858	1.13286	0.0062	34.2918	949162	2	2	8
6	PHA-665752	MHH-NB-11	0.994403	0.00144736	2.36231	0.830818	0.0048	50.4797	908135	2	2	8
6	PHA-665752	U-87-MG	0.903054	0.0124364	2.59396	1.79266	0.363	-4.07621	687590	2	2	8
6	PHA-665752	CA46	0.991448	0.00226523	2.52946	1.32978	0.0472	45.6781	910703	2	2	8
6	PHA-665752	LB996-RCC	0.967549	0.00734888	3.2464	1.92793	0.0152	19.6887	753585	2	2	8
6	PHA-665752	ES1	0.762793	0.0187824	0.986685	1.44161	0.8592	1.23943	949158	2	2	8
6	PHA-665752	TK10	0.991535	0.00263294	2.83112	1.01305	0.0054	32.5093	905980	2	2	8
6	PHA-665752	KASUMI-1	0.976334	0.00533043	3.14126	1.77924	0.0142	14.5452	907275	2	2	8
6	PHA-665752	CL-11	0.983224	0.00429717	3.17577	2.12385	0.0072	29.8123	1290769	2	2	8
6	PHA-665752	RXF393	0.99291	0.00176317	2.71747	0.992767	0.0054	31.5586	905978	2	2	8
6	PHA-665752	NCI-H1838	0.984738	0.00404637	3.75055	2.45593	0.0124	17.3461	687807	2	2	8
6	PHA-665752	OCI-AML2	0.924691	0.0112017	2.86319	1.94433	0.2088	5.32425	910947	2	2	8
6	PHA-665752	EW-22	0.699303	0.0206745	1.76362	1.83037	0.7656	-4.52398	949167	2	2	8
6	PHA-665752	NB10	0.860018	0.0151951	2.60977	1.85216	0.4204	2.16842	949171	2	2	8
6	PHA-665752	NB4	0.990053	0.00287317	2.91827	1.58311	0.0078	34.6143	1323913	2	2	8
6	PHA-665752	NCI-H23	0.932609	0.0104343	2.96047	1.81013	0.1442	11.3845	905942	2	2	8
6	PHA-665752	UACC-812	0.87024	0.014567	2.66997	1.81471	0.3272	-0.804292	910910	2	2	8
6	PHA-665752	MSTO-211H	0.995674	0.00100073	2.75184	1.11565	0.005	58.2614	908152	2	2	8
6	PHA-665752	IST-SL1	0.923717	0.0141281	2.7494	1.9455	0.22	0.291859	753564	2	2	8
6	PHA-665752	TGBC24TKB	0.840339	0.037982	1.26988	1.83296	0.6758	-4.69659	910695	2	2	8
6	PHA-665752	KM-H2	0.995358	0.00114061	2.28751	0.492433	0.0048	55.7559	909976	2	2	8
6	PHA-665752	NBsusSR	0.952762	0.00830772	2.85218	1.96861	0.184	-0.408392	925342	2	2	8
6	PHA-665752	EW-16	0.965561	0.00602735	1.15058	1.39725	0.5606	22.2981	949165	2	2	8
6	PHA-665752	RH-1	0.973392	0.00599419	2.99469	1.35203	0.0158	17.7479	971773	2	2	8
6	PHA-665752	A101D	0.965466	0.00762282	0.828878	1.06539	0.6904	23.1044	910921	2	2	8
6	PHA-665752	Daudi	0.983159	0.00460524	3.20157	1.73619	0.0106	24.8195	906831	2	2	8
6	PHA-665752	IMR-5	0.849072	0.0158155	2.01433	1.79473	0.631	1.11504	907170	2	2	8
6	PHA-665752	ALL-PO	0.67116	0.0202532	-0.159648	0.320459	0.9738	-4.3775	910944	2	2	8
6	PHA-665752	CRO-AP2	0.995149	0.00109347	2.57815	1.24808	0.0194	58.0072	906807	2	2	8
6	PHA-665752	KMOE-2	0.990764	0.00251903	2.81951	1.50766	0.0284	32.6735	907280	2	2	8
6	PHA-665752	TALL-1	0.967941	0.00684657	3.29427	1.5791	0.02	11.1307	909762	2	2	8
6	PHA-665752	JSC-1	0.994729	0.00124629	2.45479	1.98029	0.0244	56.9262	1327769	2	2	8
6	PHA-665752	GDM-1	0.858081	0.0136886	1.23602	1.44063	0.7578	5.2086	906870	2	2	8
6	PHA-665752	GT3TKB	0.994454	0.00132275	2.29785	0.855734	0.0056	44.2969	907041	2	2	8
6	PHA-665752	SK-LMS-1	0.717804	0.0182051	-0.157549	0.588168	0.9466	3.40127	909720	2	2	8
6	PHA-665752	DB	0.994733	0.00127567	2.42002	1.49121	0.0286	56.83	906832	2	2	8
6	PHA-665752	NCI-H1648	0.990419	0.00349748	3.27447	2.32241	0.0098	9.56463	687799	2	2	8
6	PHA-665752	OCI-AML5	0.912417	0.0118038	2.43399	1.8009	0.4166	5.59932	1330983	2	2	8
6	PHA-665752	BT-474	0.973543	0.00590383	2.98325	1.65208	0.054	7.70444	946359	2	2	8
6	PHA-665752	LS-1034	0.983851	0.00491713	3.65729	2.98706	0.0084	19.3016	917486	2	2	8
6	PHA-665752	UACC-257	0.970313	0.00683569	2.76554	1.22645	0.013	24.9415	905977	2	2	8
6	PHA-665752	NCI-SNU-16	0.990255	0.00249745	2.59935	1.80349	0.0682	28.9953	908446	2	2	8
6	PHA-665752	LC4-1	0.994032	0.00147905	2.57464	1.55007	0.0332	48.3946	907787	2	2	8
6	PHA-665752	RPMI-8866	0.996041	0.00087973	3.1424	1.40532	0.0042	64.5575	910544	2	2	8
6	PHA-665752	K052	0.995508	0.00102726	3.16529	2.62983	0.0042	56.1249	907284	2	2	8
6	PHA-665752	MZ1-PC	0.97353	0.0062071	2.83005	1.80575	0.0456	7.90507	753595	2	2	8
6	PHA-665752	D-336MG	0.925244	0.0114005	3.21405	1.84551	0.0216	5.40094	946369	2	2	8
6	PHA-665752	HCC1599	0.994311	0.0014342	3.0646	1.41727	0.0054	41.769	749713	2	2	8
6	PHA-665752	HH	0.99438	0.00134688	2.67688	1.75602	0.0342	55.7172	907056	2	2	8
6	PHA-665752	BC-3	0.991527	0.00233754	3.28909	1.9906	0.0096	37.0602	910918	2	2	8
6	PHA-665752	JiyoyeP-2003	0.995399	0.0010556	2.97513	1.57327	0.0048	54.6163	907268	2	2	8
6	PHA-665752	ES4	0.867239	0.0145649	3.1138	1.8296	0.1068	-3.79359	949156	2	2	8
6	PHA-665752	EC-GI-10	0.995444	0.00111704	2.72275	1.26965	0.0044	55.2228	753555	2	2	8
6	PHA-665752	KARPAS-422	0.99489	0.00121587	2.65298	0.884156	0.0048	48.6936	907274	2	2	8
6	PHA-665752	ES-2	0.990285	0.00246986	2.80657	1.82024	0.029	25.8948	1240128	2	2	8
6	PHA-665752	MEG-01	0.96946	0.00660808	3.55157	2.59551	0.0136	21.331	908126	2	2	8
6	PHA-665752	MMAC-SF	0.986701	0.00481377	2.63847	1.77057	0.054	15.3076	925339	2	2	8
6	PHA-665752	NCI-H1417	0.98947	0.00298053	3.30043	2.14473	0.0058	37.5174	688001	2	2	8
6	PHA-665752	NCI-H1355	0.990271	0.00312138	2.82958	0.844424	0.0084	13.1431	724866	2	2	8
6	PHA-665752	NCI-H1395	0.884343	0.0135479	2.78576	1.95171	0.3408	-5.61312	684681	2	2	8
6	PHA-665752	NCI-H1770	0.796227	0.0180449	1.73013	1.6539	0.7324	-1.66428	687804	2	2	8
6	PHA-665752	GCIY	0.992354	0.00225733	3.03086	1.39989	0.0052	33.8376	906869	2	2	8
6	PHA-665752	NCI-H128	0.835614	0.0167271	2.57118	2.02698	0.4624	1.04898	753597	2	2	8
6	PHA-665752	OPM-2	0.996046	0.000838377	2.50995	1.06364	0.0058	64.5575	909249	2	2	8
6	PHA-665752	CAS-1	0.993021	0.00304166	2.97591	1.23834	0.0056	25.5984	910943	2	2	8
6	PHA-665752	MRK-nu-1	0.921675	0.00991634	0.963284	1.32878	0.7668	4.24971	908151	2	2	8
6	PHA-665752	SK-PN-DW	0.98839	0.00354238	3.44336	2.07865	0.0098	28.554	909731	2	2	8
6	PHA-665752	EW-18	0.98773	0.0037067	2.32751	1.69994	0.0664	16.628	949164	2	2	8
6	PHA-665752	THP-1	0.981083	0.0047731	2.88956	1.1919	0.0158	19.518	909771	2	2	8
6	PHA-665752	NCI-H510A	0.981634	0.00471556	2.87535	1.87115	0.0988	36.4664	753605	2	2	8
6	PHA-665752	EW-11	0.810844	0.0173562	2.9252	1.91961	0.3722	-3.33876	684062	2	2	8
6	PHA-665752	KARPAS-620	0.962759	0.00810762	3.42633	1.6546	0.0214	26.827	1327775	2	2	8
6	PHA-665752	SHP-77	0.994981	0.00120433	2.74188	1.43949	0.0048	50.6213	724872	2	2	8
6	PHA-665752	SW684	0.963515	0.00815921	3.25379	1.75536	0.0128	27.2313	909754	2	2	8
6	PHA-665752	CTV-1	0.983795	0.00398319	2.2204	1.86371	0.1604	48.1423	753548	2	2	8
6	PHA-665752	SCC-3	0.936559	0.00983901	2.65511	1.83735	0.2512	6.83746	910930	2	2	8
6	PHA-665752	KNS-42	0.993999	0.00156812	3.32026	1.79837	0.0064	30.7843	907282	2	2	8
6	PHA-665752	NKM-1	0.879455	0.0145005	2.85013	1.95442	0.338	1.10128	908448	2	2	8
6	PHA-665752	HCC-33	0.992297	0.00199067	2.50712	0.799022	0.0056	26.9375	1303901	2	2	8
6	PHA-665752	MKL-1-subclone-2	0.993997	0.00147314	2.62952	1.36472	0.026	29.3702	1333014	2	2	8
6	PHA-665752	EVSA-T	0.995057	0.00112574	2.64511	1.55482	0.0208	57.7954	906862	2	2	8
6	PHA-665752	Raji	0.996052	0.000850546	2.63534	1.4907	0.0044	64.5575	909262	2	2	8
6	PHA-665752	RKO	0.996032	0.000870566	3.26348	1.34924	0.0048	64.5575	909698	2	2	8
6	PHA-665752	KP-N-YS	0.900207	0.0130819	2.84196	2.04783	0.2574	0.897359	946363	2	2	8
6	PHA-665752	SUP-T1	0.891631	0.0121263	0.872504	1.23638	0.8102	18.1981	909743	2	2	8
6	PHA-665752	NCI-H2141	0.994785	0.00120826	2.34773	1.22225	0.03	56.945	688014	2	2	8
6	PHA-665752	L-1236	0.982272	0.00509477	2.7948	1.50444	0.011	14.8199	1330935	2	2	8
6	PHA-665752	JURL-MK1	0.800067	0.01732	2.21843	2.60946	0.1004	-11.0427	1327771	2	2	8
6	PHA-665752	LC-1F	0.879621	0.0168391	1.89274	1.76695	0.5782	-10.9256	907785	2	2	8
6	PHA-665752	ST486	0.95424	0.00829304	2.84318	1.83385	0.1428	6.59961	910906	2	2	8
6	PHA-665752	HDLM-2	0.993393	0.00149025	2.61509	1.36215	0.0236	36.1786	924110	2	2	8
6	PHA-665752	NCI-H209	0.996081	0.000868193	2.69711	1.17164	0.0034	64.5575	688013	2	2	8
6	PHA-665752	KP-N-YN	0.852856	0.0150069	2.47791	1.87329	0.4692	-2.46125	907314	2	2	8
6	PHA-665752	NCI-H220	0.989385	0.00300577	2.63205	1.07577	0.0076	26.0542	1330974	2	2	8
6	PHA-665752	TE-8	0.996092	0.000839936	2.60428	1.03614	0.0038	64.5575	753623	2	2	8
6	PHA-665752	no-11	0.994729	0.00123728	2.88084	1.57702	0.019	50.6213	908450	2	2	8
6	PHA-665752	LB831-BLC	0.950338	0.0112206	2.93608	1.78436	0.069	-2.12762	753584	2	2	8
6	PHA-665752	NB14	0.916207	0.0114034	2.26144	1.79383	0.4506	3.38309	949178	2	2	8
6	PHA-665752	WSU-DLCL2	0.996061	0.000861176	2.4578	1.38635	0.0032	64.5575	1331050	2	2	8
6	PHA-665752	MOLP-8	0.994077	0.00157988	2.4122	1.72023	0.0524	54.3406	1330950	2	2	8
6	PHA-665752	NCI-H720	0.877343	0.0205689	2.35452	1.9036	0.5	-4.47235	687600	2	2	8
6	PHA-665752	NB7	0.924415	0.0175285	2.14274	1.8864	0.2866	1.10891	949174	2	2	8
6	PHA-665752	CP66-MEL	0.992021	0.00259511	2.60961	1.02247	0.004	42.2519	753546	2	2	8
6	PHA-665752	DMS-79	0.958385	0.00878258	3.31611	1.95286	0.0156	5.54033	753551	2	2	8
6	PHA-665752	NTERA-S-cl-D1	0.830889	0.0175202	2.82789	1.8897	0.1972	-6.81466	908454	2	2	8
6	PHA-665752	Farage	0.987589	0.00354013	3.23876	1.90551	0.006	36.6281	1297449	2	2	8
6	PHA-665752	JVM-3	0.995995	0.000877117	2.79232	1.49811	0.0034	64.5575	907270	2	2	8
6	PHA-665752	EKVX	0.927776	0.0111147	2.94334	1.73439	0.078	-3.81235	905970	2	2	8
6	PHA-665752	SK-N-DZ	0.984204	0.00369512	2.37769	1.63813	0.142	28.8039	688086	2	2	8
6	PHA-665752	RPMI-6666	0.984265	0.0044694	2.93724	1.56649	0.008	23.9765	909701	2	2	8
6	PHA-665752	TE-5	0.986333	0.00438342	2.97261	1.73583	0.008	38.0447	735784	2	2	8
6	PHA-665752	A704	0.927838	0.011019	3.12967	2.16701	0.1218	-1.59987	910920	2	2	8
6	PHA-665752	Becker	0.886547	0.0129373	2.01405	1.74886	0.5462	24.8639	906746	2	2	8
6	PHA-665752	CHP-126	0.989919	0.00326584	3.04917	1.619	0.006	26.0642	910567	2	2	8
6	PHA-665752	MOLT-13	0.974649	0.0225898	1.63132	1.6599	0.2004	27.2848	908146	2	2	8
6	PHA-665752	BV-173	0.932065	0.0106471	3.27002	1.52346	0.0336	3.70341	910710	2	2	8
6	PHA-665752	LAN-6	0.944227	0.00985705	3.27935	1.8992	0.0272	7.17062	949170	2	2	8
6	PHA-665752	ES7	0.94595	0.00911257	2.64543	2.00322	0.2582	5.20023	684059	2	2	8
6	PHA-665752	GA-10	0.992304	0.00245759	3.62596	2.62541	0.0068	44.1029	1303896	2	2	8
6	PHA-665752	COLO-829	0.81259	0.0277298	1.37619	1.67108	0.718	-19.2705	687448	2	2	8
6	PHA-665752	COLO-800	0.878957	0.0152245	1.92706	1.77593	0.5434	-2.27275	906813	2	2	8
6	PHA-665752	EW-3	0.856374	0.015527	2.64376	1.85238	0.3672	-0.113167	949161	2	2	8
6	PHA-665752	RCC10RGB	0.823198	0.0201036	2.91356	2.03641	0.3392	-14.6216	909974	2	2	8
6	PHA-665752	TE-9	0.99604	0.000916564	2.93491	1.24406	0.0044	64.5575	946353	2	2	8
6	PHA-665752	A498	0.844469	0.0163869	1.81562	1.71592	0.6398	-0.678971	905948	2	2	8
6	PHA-665752	KP-N-RT-BM-1	0.990632	0.00289045	3.28835	1.56764	0.0092	13.2553	924189	2	2	8
6	PHA-665752	MONO-MAC-6	0.954693	0.00805079	2.59271	1.85443	0.2378	12.9036	908148	2	2	8
6	PHA-665752	SUP-B15	0.968455	0.00627815	2.1595	1.7904	0.2618	38.728	1247871	2	2	8
6	PHA-665752	K-562	0.862647	0.0146538	2.76879	1.95959	0.3286	-0.334877	905940	2	2	8
6	PHA-665752	NCI-H719	0.994916	0.00127703	3.14422	1.6827	0.0078	45.9698	924242	2	2	8
6	PHA-665752	KYM-1	0.770437	0.020264	2.11748	1.847	0.6582	-10.5114	1240166	2	2	8
6	PHA-665752	LNCaP-Clone-FGC	0.87563	0.0138038	2.91765	2.02253	0.2796	-1.61506	907788	2	2	8
6	PHA-665752	NCI-SNU-5	0.461475	0.0154949	-1.36551	0.0388915	1	-1.08777	908445	2	2	8
6	PHA-665752	LU-139	0.981354	0.00488389	3.00765	1.43938	0.014	16.7358	713878	2	2	8
6	PHA-665752	SF539	0.870472	0.0167193	2.53593	1.89363	0.4256	-6.35551	905984	2	2	8
6	PHA-665752	TGBC1TKB	0.905096	0.0253837	2.70518	1.91523	0.262	-6.07869	909769	2	2	8
6	PHA-665752	SCC-15	0.988406	0.00287397	2.23403	1.56015	0.1206	42.7463	910911	2	2	8
6	PHA-665752	MV-4-11	0.895897	0.0104817	0.209202	0.427199	0.953	32.7177	908156	2	2	8
6	PHA-665752	ONS-76	0.988512	0.00352832	3.06778	1.63667	0.0072	40.3097	909248	2	2	8
6	PHA-665752	CCRF-CEM	0.98244	0.00406063	2.5333	1.80415	0.129	20.6957	905952	2	2	8
6	PHA-665752	DMS-153	0.920163	0.0117209	3.41845	2.10312	0.0314	9.85097	687984	2	2	8
6	PHA-665752	SU-DHL-4	0.976252	0.00537464	2.64081	1.74901	0.122	21.2157	1331035	2	2	8
6	PHA-665752	K5	0.993243	0.00161785	3.21918	1.42597	0.0062	30.5011	924238	2	2	8
6	PHA-665752	D-263MG	0.995232	0.00115148	2.50553	0.882628	0.0056	51.819	946368	2	2	8
6	PHA-665752	NOS-1	0.85117	0.0455841	1.01822	1.50938	0.7812	-17.0845	925345	2	2	8
6	PHA-665752	no-10	0.944903	0.00973492	3.01103	1.56958	0.0438	3.74032	908452	2	2	8
6	PHA-665752	OS-RC-2	0.982762	0.00537415	2.5715	0.802331	0.007	27.1064	909250	2	2	8
6	PHA-665752	NCI-H716	0.97219	0.00626135	2.59345	1.83096	0.1014	1.32515	908458	2	2	8
6	PHA-665752	TC-71	0.996037	0.000895192	3.2217	1.94319	0.0046	64.5575	1240221	2	2	8
6	PHA-665752	SIMA	0.907155	0.0117449	2.56394	1.9341	0.3702	5.89624	753620	2	2	8
6	PHA-665752	COLO-684	0.990548	0.00271256	2.68233	1.43352	0.0082	25.072	910691	2	2	8
6	PHA-665752	A253	0.995562	0.00112322	2.91194	1.27221	0.0054	48.8553	906794	2	2	8
6	PHA-665752	U-698-M	0.988164	0.00287106	2.93069	2.05283	0.0378	10.2852	909777	2	2	8
6	PHA-665752	KE-37	0.977694	0.00506624	2.58789	2.01188	0.1696	25.7929	907277	2	2	8
6	PHA-665752	JVM-2	0.982019	0.00478746	3.06565	1.7895	0.038	11.5369	907269	2	2	8
6	PHA-665752	NCI-H446	0.995517	0.00106035	2.68224	0.993582	0.0058	56.9466	688023	2	2	8
6	PHA-665752	GOTO	0.985641	0.00364598	2.58459	1.92096	0.0642	22.7037	906875	2	2	8
6	PHA-665752	NCI-H1155	0.971837	0.006603	3.06261	1.70187	0.012	22.4356	908467	2	2	8
6	PHA-665752	NCI-H1666	0.782793	0.0184283	1.97151	1.78436	0.684	-0.464634	908473	2	2	8
6	PHA-665752	NCI-H2171	0.812366	0.0169168	2.1958	1.82943	0.6106	2.53095	688015	2	2	8
6	PHA-665752	BL-41	0.702911	0.0381508	-0.371083	0.135804	1	-18.301	910706	2	2	8
6	PHA-665752	P31-FUJ	0.990532	0.00237062	3.06029	1.49291	0.0078	28.3336	909253	2	2	8
6	PHA-665752	NAMALWA	0.962978	0.00596763	1.08592	1.27251	0.6186	16.5168	908159	2	2	8
6	PHA-665752	MLMA	0.996042	0.000859688	3.56732	2.13139	0.0054	64.5575	908142	2	2	8
6	PHA-665752	NCI-H526	0.993506	0.00159683	2.51026	1.84592	0.0438	45.1646	688025	2	2	8
6	PHA-665752	HCC1500	0.914657	0.0117483	2.87537	1.7995	0.1798	1.91125	1303900	2	2	8
6	PHA-665752	LOUCY	0.988183	0.00333257	3.11336	1.69791	0.0054	32.1133	907789	2	2	8
6	PHA-665752	SCLC-21H	0.994996	0.00116613	2.75931	1.4039	0.022	57.6939	753611	2	2	8
6	PHA-665752	D-247MG	0.962619	0.0081799	3.16306	1.67983	0.0178	6.99271	946367	2	2	8
6	PHA-665752	KALS-1	0.916089	0.012115	3.33981	1.58221	0.0356	-1.42964	907271	2	2	8
6	PHA-665752	KARPAS-231	0.982523	0.00425671	2.55262	1.64797	0.1028	26.1801	1327774	2	2	8
6	PHA-665752	NCI-H1304	0.995478	0.00112205	2.61556	0.921062	0.0054	56.7978	753599	2	2	8
6	PHA-665752	RL	0.917168	0.0114507	2.61942	1.93729	0.3236	4.59237	910861	2	2	8
6	PHA-665752	SK-UT-1	0.973563	0.00681244	3.21873	2.4193	0.0112	10.5785	909732	2	2	8
6	PHA-665752	GB-1	0.943885	0.0119102	1.30993	1.56257	0.4938	16.6038	687568	2	2	8
6	PHA-665752	TUR	0.996037	0.000876558	3.3914	2.23118	0.0046	64.5575	909773	2	2	8
6	PHA-665752	LB2241-RCC	0.586438	0.0156272	-0.79367	0.060023	1	1.62741	753578	2	2	8
6	PHA-665752	NB17	0.985257	0.00468682	2.85941	1.33925	0.0114	7.82257	949175	2	2	8
6	PHA-665752	TF-1	0.974234	0.00575464	3.02028	1.58417	0.0134	14.2081	1331044	2	2	8
6	PHA-665752	LS-411N	0.97006	0.00750213	3.42974	2.17322	0.0192	-13.2425	907794	2	2	8
6	PHA-665752	TE-1	0.915772	0.0120611	2.86259	1.83368	0.1362	-3.24432	753621	2	2	8
6	PHA-665752	PL-21	0.94584	0.00911483	2.86783	1.85574	0.1026	2.69033	1330991	2	2	8
6	PHA-665752	ARH-77	0.992332	0.00201388	3.43307	2.06477	0.0072	35.4826	906765	2	2	8
6	PHA-665752	ES6	0.94988	0.00762528	0.581973	0.780854	0.8444	-0.268519	949157	2	2	8
6	PHA-665752	LB647-SCLC	0.994595	0.00128296	3.04343	1.83265	0.0048	42.4882	753582	2	2	8
6	PHA-665752	MFH-ino	0.935875	0.0170593	2.89457	1.94231	0.0112	10.9723	925343	2	2	8
6	PHA-665752	CTB-1	0.983526	0.00418377	2.6405	1.35457	0.0376	24.3298	949088	2	2	8
6	PHA-665752	NCI-H69	0.992849	0.00166168	2.5789	1.43774	0.0308	29.4907	688027	2	2	8
6	PHA-665752	SW982	0.983978	0.00449364	2.91268	2.0154	0.0092	28.9183	909759	2	2	8
6	PHA-665752	DND-41	0.938023	0.010211	2.74499	1.67158	0.2054	4.41286	1297446	2	2	8
6	PHA-665752	PSN1	0.98337	0.00496131	3.02129	2.01499	0.0282	14.4597	910546	2	2	8
6	PHA-665752	BL-70	0.945303	0.00906175	2.56576	1.77955	0.2504	10.2482	910707	2	2	8
6	PHA-665752	MOLT-4	0.990804	0.00246298	2.46205	1.18417	0.0196	32.1441	905958	2	2	8
6	PHA-665752	HCC2157	0.996106	0.000838569	2.78531	1.03457	0.0042	64.5575	749715	2	2	8
6	PHA-665752	NK-92MI	0.978673	0.0046854	1.96425	1.63595	0.2418	28.3885	1330981	2	2	8
6	PHA-665752	SBC-1	0.996018	0.000903745	2.97234	1.75371	0.0038	64.5575	713885	2	2	8
6	PHA-665752	TE-15	0.841482	0.0190186	2.03039	1.75511	0.6312	-10.0579	753614	2	2	8
6	PHA-665752	COR-L279	0.995122	0.00112117	2.62622	1.40453	0.0236	58.039	910937	2	2	8
6	PHA-665752	P32-ISH	0.984148	0.0044444	2.31842	1.6644	0.0874	27.2961	1330987	2	2	8
6	PHA-665752	NOMO-1	0.943826	0.00915787	2.7774	1.97324	0.2258	5.31633	908451	2	2	8
6	PHA-665752	NH-12	0.982946	0.00434773	3.67889	2.54989	0.0096	29.7195	908447	2	2	8
6	PHA-665752	NCI-H1975	0.994042	0.00149956	2.61664	1.09415	0.0058	35.5747	924244	2	2	8
6	PHA-665752	ETK-1	0.908422	0.020148	1.82993	1.73548	0.576	-0.714352	906861	2	2	8
6	PHA-665752	ECC4	0.871379	0.0169648	2.74643	1.93676	0.3558	-3.76107	906850	2	2	8
6	PHA-665752	EM-2	0.969396	0.00673337	2.70551	1.42656	0.0114	22.9746	906855	2	2	8
6	PHA-665752	HA7-RCC	0.970448	0.00689126	3.08611	1.79147	0.0132	9.80082	753558	2	2	8
6	PHA-665752	RS4-11	0.844501	0.0163094	2.4396	1.84392	0.515	2.19865	909703	2	2	8
6	PHA-665752	OCUB-M	0.987942	0.00379377	3.21586	1.90366	0.0084	23.5238	909256	2	2	8
6	PHA-665752	CESS	0.956643	0.00794843	3.09434	1.94517	0.0942	5.27404	910688	2	2	8
6	PHA-665752	A4-Fuk	0.954711	0.00850529	3.30356	1.71035	0.0198	11.5839	910934	2	2	8
6	PHA-665752	NCI-H1963	0.996052	0.000874049	2.6466	0.654433	0.003	64.5575	688010	2	2	8
6	PHA-665752	GI-1	0.877043	0.0217227	2.17104	2.02077	0.5438	-3.1114	906871	2	2	8
6	PHA-665752	DJM-1	0.992607	0.00241839	3.10188	1.60416	0.0048	44.5213	906841	2	2	8
6	PHA-665752	RPMI-8226	0.905874	0.0124594	3.29085	1.8308	0.0416	4.76229	905964	2	2	8
6	PHA-665752	J-RT3-T3-5	0.957986	0.00787736	2.77918	1.61221	0.0574	11.2338	907391	2	2	8
6	PHA-665752	NCI-H847	0.995378	0.0010957	2.33974	0.755676	0.004	55.2286	1240193	2	2	8
6	PHA-665752	Tera-1	0.990785	0.00241041	2.84559	1.22998	0.0066	24.5264	1331043	2	2	8
6	PHA-665752	SIG-M5	0.996074	0.000848259	2.72528	1.45018	0.0042	64.5575	909715	2	2	8
6	PHA-665752	TE-12	0.976114	0.00582648	2.63324	1.82901	0.1562	-0.69775	946356	2	2	8
6	PHA-665752	COLO-824	0.854418	0.020489	2.19957	1.84506	0.3354	-8.93498	906812	2	2	8
6	PHA-665752	JAR	0.988074	0.00326418	2.87474	1.32493	0.0072	36.9104	907175	2	2	8
6	PHA-665752	HCE-4	0.987179	0.00354446	2.15199	1.61903	0.0974	12.1167	753559	2	2	8
6	PHA-665752	MEC-1	0.995448	0.00102733	2.77799	1.61986	0.0154	58.969	1330943	2	2	8
6	PHA-665752	REH	0.880234	0.0141383	2.79664	2.11845	0.359	3.66364	909696	2	2	8
6	PHA-665752	SU-DHL-1	0.971282	0.00612326	2.89514	1.94635	0.1226	16.273	909742	2	2	8
6	PHA-665752	TE-6	0.989099	0.00308088	3.152	1.41978	0.009	23.6318	946355	2	2	8
6	PHA-665752	WIL2-NS	0.995337	0.00113242	3.53356	1.82161	0.0052	54.7632	1331049	2	2	8
6	PHA-665752	LB2518-MEL	0.955622	0.0149081	2.50836	1.86224	0.2108	-4.26716	753579	2	2	8
6	PHA-665752	Calu-6	0.994068	0.00166934	2.47893	1.15092	0.0036	33.4624	724859	2	2	8
6	PHA-665752	SNU-C2B	0.982089	0.00501038	2.6413	1.27144	0.0076	13.3611	909740	2	2	8
6	PHA-665752	NCI-H2126	0.980187	0.00558614	3.01507	1.38618	0.0138	3.96245	687814	2	2	8
6	PHA-665752	L-540	0.942026	0.00947511	3.01637	2.26692	0.1162	2.38024	907323	2	2	8
6	PHA-665752	SU-DHL-6	0.996077	0.000834318	2.70847	1.31159	0.0042	64.5575	1331037	2	2	8
6	PHA-665752	HCC2218	0.995505	0.00105489	2.32442	1.13262	0.0032	56.8932	749716	2	2	8
6	PHA-665752	ES3	0.947551	0.00914104	3.31263	1.79679	0.0338	6.51113	684055	2	2	8
6	PHA-665752	KCL-22	0.975661	0.00571531	3.05845	2.02103	0.0628	16.5489	1330931	2	2	8
6	PHA-665752	SW962	0.931159	0.012592	2.34321	1.83448	0.3622	4.69775	909758	2	2	8
6	PHA-665752	LS-513	0.895656	0.0126998	2.93698	1.95747	0.2134	1.75237	907795	2	2	8
6	PHA-665752	LU-165	0.936281	0.0103006	3.13192	1.92934	0.1082	5.21501	753589	2	2	8
6	PHA-665752	NALM-6	0.993486	0.0018917	2.26515	1.58097	0.0662	51.9571	908158	2	2	8
6	PHA-665752	RL95-2	0.881588	0.0209653	2.66708	2.07108	0.333	-13.5808	930082	2	2	8
6	PHA-665752	OVCAR-4	0.994693	0.001251	2.97605	2.05854	0.0034	40.7144	905990	2	2	8
6	PHA-665752	JJN-3	0.995445	0.00111216	3.15393	1.51442	0.0056	55.0597	1327766	2	2	8
6	PHA-665752	IM-9	0.982984	0.0042666	3.01925	1.79897	0.0312	24.6311	753563	2	2	8
6	PHA-665752	ALL-SIL	0.919887	0.0127631	1.49006	1.58526	0.648	-5.11415	1295740	2	2	8
6	PHA-665752	DSH1	0.99545	0.00103781	2.65303	1.15039	0.003	54.4534	753552	2	2	8
6	PHA-665752	A388	0.987297	0.00581418	2.96633	1.34711	0.0084	16.8699	910697	2	2	8
6	PHA-665752	MZ7-mel	0.97169	0.00703548	2.9405	1.47278	0.01	30.9943	753596	2	2	8
6	PHA-665752	MDA-MB-134-VI	0.996111	0.000862195	3.05691	1.68482	0.0034	64.5575	908119	2	2	8
6	PHA-665752	LS-123	0.94731	0.00915831	2.7704	1.87001	0.1904	3.28068	907792	2	2	8
6	PHA-665752	MS-1	0.994276	0.00157578	2.90859	1.27007	0.0064	49.2707	753594	2	2	8
6	PHA-665752	NCI-H322M	0.850042	0.0193983	2.95349	2.05902	0.3108	-16.8639	905967	2	2	8
6	PHA-665752	NCI-H1522	0.976299	0.00581591	3.11973	1.89717	0.0168	17.9288	908464	2	2	8
6	PHA-665752	NCI-H1836	0.923505	0.0108947	2.54404	1.92366	0.3392	4.00884	1240182	2	2	8
6	PHA-665752	SW954	0.994576	0.00133729	4.466	4.28937	0.0044	45.666	924247	2	2	8
6	PHA-665752	MC116	0.978207	0.00591711	3.2454	2.12101	0.0164	11.1794	907799	2	2	8
6	PHA-665752	HL-60	0.994189	0.00137428	3.25058	2.3548	0.005	41.3959	905938	2	2	8
6	PHA-665752	NCI-H1876	0.996054	0.000911561	2.36807	0.528631	0.0032	64.5575	1330972	2	2	8
6	PHA-665752	COR-L95	0.929612	0.0107542	3.08905	2.02331	0.1536	2.93567	1297439	2	2	8
6	PHA-665752	GI-ME-N	0.990489	0.0025032	2.92566	1.97295	0.0254	18.1194	906872	2	2	8
6	PHA-665752	KARPAS-299	0.990523	0.00280462	3.18469	1.6859	0.0052	35.1642	907273	2	2	8
6	PHA-665752	MKL-2	0.958407	0.00809419	3.38432	2.26606	0.0208	6.58666	1333015	2	2	8
6	PHA-665752	HC-1	0.996092	0.000821648	2.63055	0.849429	0.0042	64.5575	907044	2	2	8
6	PHA-665752	EB2	0.8992	0.0124509	2.45471	1.97445	0.452	11.9576	906846	2	2	8
6	PHA-665752	KURAMOCHI	0.981034	0.00672412	2.76146	1.84119	0.0546	12.2227	909975	2	2	8
6	PHA-665752	C2BBe1	0.983996	0.00506046	2.87751	1.51884	0.014	17.2322	910700	2	2	8
6	PHA-665752	DG-75	0.995638	0.0010265	2.48022	1.39096	0.003	57.9444	906838	2	2	8
6	PHA-665752	SJSA-1	0.994565	0.0014121	2.74551	1.54189	0.0042	46.2741	909717	2	2	8
6	PHA-665752	H-EMC-SS	0.964835	0.00690466	2.82786	1.84636	0.1284	18.5619	907290	2	2	8
6	PHA-665752	ES5	0.992204	0.00248219	2.30852	1.74776	0.0744	37.107	684057	2	2	8
6	PHA-665752	CP67-MEL	0.990293	0.00270937	2.3754	1.76619	0.0994	-6.49327	949092	2	2	8
6	PHA-665752	ATN-1	0.934379	0.010332	3.17648	1.79974	0.032	8.02447	910687	2	2	8
6	PHA-665752	DMS-114	0.981451	0.00447471	3.21526	1.65092	0.0148	11.5457	687983	2	2	8
6	PHA-665752	IST-MES1	0.99498	0.00123233	2.91731	1.55021	0.004	48.1296	907173	2	2	8
6	PHA-665752	P3HR-1	0.995377	0.0011325	2.60472	1.47865	0.0046	54.72	1330988	2	2	8
6	PHA-665752	HEL	0.995657	0.000999622	2.86032	1.54379	0.0046	58.6855	907053	2	2	8
6	PHA-665752	KINGS-1	0.6115	0.0208548	-1.05037	0.147884	0.9932	-6.04643	907279	2	2	8
6	PHA-665752	ACN	0.9801	0.00567387	2.47028	1.51127	0.0384	17.3204	906803	2	2	8
6	PHA-665752	SK-N-FI	0.95968	0.00796365	3.01605	1.55505	0.0182	9.79437	688087	2	2	8
6	PHA-665752	TE-441-T	0.750697	0.0188921	1.71908	1.6288	0.7606	-4.95074	924248	2	2	8
6	PHA-665752	NCI-H1385	0.969183	0.00648366	2.85921	1.91118	0.1298	4.55638	1330965	2	2	8
6	PHA-665752	NCI-SNU-1	0.981775	0.00431758	1.85486	1.56406	0.2378	47.3305	908444	2	2	8
6	PHA-665752	NB(TU)1-10	0.955771	0.00812047	2.47401	1.82892	0.278	7.12072	1240181	2	2	8
6	PHA-665752	HAL-01	0.910527	0.0123924	2.59637	1.79328	0.312	4.19238	949153	2	2	8
6	PHA-665752	NCI-H2196	0.970924	0.00594885	2.75744	1.9132	0.131	10.8697	908481	2	2	8
6	PHA-665752	EJM	0.988447	0.00338167	2.70664	1.76578	0.0268	34.2113	1297447	2	2	8
6	PHA-665752	A3-KAW	0.959298	0.00732219	2.61729	1.96335	0.2164	6.84436	910935	2	2	8
6	PHA-665752	GAK	0.995697	0.00107223	2.72491	1.02677	0.0046	48.1069	910932	2	2	8
6	PHA-665752	ML-2	0.958614	0.00803872	3.20378	1.76459	0.0156	14.548	908141	2	2	8
6	PHA-665752	EW-13	0.97637	0.00537303	2.51928	1.88879	0.1434	26.6756	949166	2	2	8
6	PHA-665752	OCI-AML3	0.99551	0.00104164	2.83099	1.12682	0.0054	55.7829	1290455	2	2	8
6	PHA-665752	MC-CAR	0.965785	0.00701473	2.90425	1.96643	0.1146	13.5158	683665	2	2	8
6	PHA-665752	BB49-HNC	0.872617	0.0250196	2.39881	1.94488	0.451	-18.8906	753532	2	2	8
6	PHA-665752	KLE	0.920293	0.0116612	2.47917	1.82016	0.1826	-2.7724	924187	2	2	8
6	PHA-665752	NCI-H1869	0.991013	0.0022999	2.58925	1.41257	0.0496	36.2135	1240183	2	2	8
6	PHA-665752	JM1	0.986495	0.00313076	2.86288	1.94061	0.0706	21.7746	1327768	2	2	8
6	PHA-665752	EoL-1-cell	0.755432	0.026205	0.48425	1.70524	0.8348	-23.745	906856	2	2	8
6	PHA-665752	KU812	0.986014	0.00353006	2.50732	1.75379	0.107	34.9021	907311	2	2	8
6	PHA-665752	IST-SL2	0.923887	0.0107078	2.52238	1.9933	0.3878	5.3263	753565	2	2	8
6	PHA-665752	SNU-C1	0.858299	0.0180128	2.20655	1.83745	0.4126	-13.5821	910905	2	2	8
6	PHA-665752	KNS-81-FD	0.943135	0.00928264	2.42515	1.78052	0.3094	13.9149	924188	2	2	8
6	PHA-665752	GR-ST	0.851283	0.0150688	1.06844	2.8922	0.088	2.60328	906877	2	2	8
6	PHA-665752	KM12	0.949532	0.00785402	1.28592	1.47041	0.544	20.7622	905989	2	2	8
6	PHA-665752	LOXIMVI	0.99248	0.00191597	2.70565	1.52481	0.0346	20.2057	905974	2	2	8
6	PHA-665752	SNB75	0.820591	0.0906355	1.06421	1.91718	0.46	-18.0779	905982	2	2	8
6	PHA-665752	MPP-89	0.935616	0.0105359	2.61844	1.80951	0.1324	-9.73766	908150	2	2	8
6	PHA-665752	KGN	0.98409	0.00457796	2.71551	1.1703	0.0086	22.9382	924186	2	2	8
6	PHA-665752	NCI-H2135	0.994972	0.00118989	3.10765	1.9932	0.0038	49.1165	1298352	2	2	8
6	PHA-665752	SH-4	0.932564	0.0102044	2.84358	1.81028	0.0658	11.4339	909713	2	2	8
6	PHA-665752	HT	0.994002	0.00155622	2.97435	2.10668	0.006	44.2841	907063	2	2	8
6	PHA-665752	NB6	0.968737	0.00717901	3.07134	1.71556	0.0112	25.277	949173	2	2	8
6	PHA-665752	NB13	0.954856	0.00838521	2.44856	1.88831	0.1548	4.60698	949177	2	2	8
6	PHA-665752	DOHH-2	0.910938	0.0167342	0.475936	0.702384	0.926	-5.2829	906842	2	2	8
6	PHA-665752	L-363	0.979987	0.00529957	3.02883	1.43913	0.0112	16.4917	924239	2	2	8
6	PHA-665752	8-MG-BA	0.995499	0.00103146	3.17736	1.21378	0.0044	56.4569	687562	2	2	8
6	PHA-665752	ME-1	0.919793	0.011452	3.15637	2.02994	0.1586	-0.499178	1330942	2	2	8
6	PHA-665752	NCI-H1299	0.991577	0.0024889	3.14001	1.20712	0.007	38.3066	724831	2	2	8
6	PHA-665752	BC-1	0.994389	0.00140068	2.60974	1.74421	0.0342	55.4443	910919	2	2	8
6	PHA-665752	NCI-H187	0.967703	0.00644635	2.92516	1.99123	0.1058	9.56468	688007	2	2	8
6	PHA-665752	SK-NEP-1	0.878234	0.0139802	2.41353	1.88083	0.4658	4.46071	909730	2	2	8
6	PHA-665752	LU-134-A	0.952631	0.00822358	2.64041	1.88003	0.238	2.67928	753588	2	2	8
6	PHA-665752	COLO-320-HSR	0.930214	0.0104087	2.76982	1.9712	0.2666	8.34661	910569	2	2	8
6	PHA-665752	VAL	0.989347	0.00284159	2.5181	1.66652	0.0504	32.6843	1331048	2	2	8
6	PHA-665752	EW-1	0.988316	0.00344914	2.56969	0.764668	0.0064	37.0284	949163	2	2	8
6	PHA-665752	NCI-H1092	0.985687	0.00381521	2.92867	1.60829	0.0446	28.2998	687997	2	2	8
6	PHA-665752	NCI-H1694	0.996078	0.000885942	2.84181	1.27049	0.0034	64.5575	688006	2	2	8
6	PHA-665752	D-283MED	0.988722	0.00320753	2.90062	1.93038	0.0368	33.9916	906834	2	2	8
6	PHA-665752	BOKU	0.949829	0.00966339	3.14565	1.60443	0.0174	7.12726	753536	2	2	8
6	PHA-665752	Ramos-2G6-4C10	0.949991	0.00856412	2.63475	2.00743	0.2144	6.33055	910401	2	2	8
6	PHA-665752	D-502MG	0.910005	0.0135889	2.70323	2.019	0.3106	-1.12416	946373	2	2	8
6	PHA-665752	TGW	0.99604	0.000873146	3.07425	1.38323	0.0048	64.5575	910780	2	2	8
6	PHA-665752	LC-2-ad	0.976651	0.00787312	2.30862	1.70399	0.1134	-8.42848	907786	2	2	8
6	PHA-665752	LP-1	0.994248	0.00133031	2.53344	1.58762	0.0286	48.6312	907791	2	2	8
6	PHA-665752	GRANTA-519	0.995475	0.00100194	2.87435	1.227	0.0042	56.285	1303897	2	2	8
6	PHA-665752	NCI-H64	0.968747	0.00681091	3.00953	1.66445	0.0202	10.3691	688026	2	2	8
6	PHA-665752	OCI-LY-19	0.986731	0.00351666	2.96425	1.33485	0.0118	24.2564	1330984	2	2	8
6	PHA-665752	LXF-289	0.936602	0.0112871	1.82615	1.71264	0.4654	0.779555	753592	2	2	8
6	PHA-665752	HCC1187	0.898369	0.0130992	2.84132	1.98358	0.275	6.78972	749711	2	2	8
6	PHA-665752	KY821	0.994284	0.00138534	2.35724	1.4924	0.0376	51.0313	907300	2	2	8
6	PHA-665752	DEL	0.989529	0.00301182	3.48812	1.97054	0.008	31.7884	906836	2	2	8
6	PHA-665752	YT	0.988852	0.00299176	2.47189	1.76477	0.0838	43.8618	946358	2	2	8
6	PHA-665752	PF-382	0.994044	0.00142085	2.61365	1.71158	0.0342	48.8208	909260	2	2	8
6	PHA-665752	Mo-T	0.985785	0.00422606	2.74232	1.44907	0.0088	28.6114	908149	2	2	8
6	PHA-665752	KOPN-8	0.982653	0.00423092	2.91079	1.91244	0.0806	19.2726	1330933	2	2	8
6	PHA-665752	EHEB	0.941173	0.00984606	3.25152	1.89416	0.0336	7.3659	906854	2	2	8
6	PHA-665752	AM-38	0.990386	0.00294404	3.67641	2.88393	0.0094	8.44757	910933	2	2	8
6	PHA-665752	LAMA-84	0.994051	0.00163897	3.01139	1.4682	0.0048	48.8826	907783	2	2	8
6	PHA-665752	IA-LM	0.995328	0.00115618	3.65434	2.61863	0.0036	50.0838	910779	2	2	8
6	PHA-665752	IST-MEL1	0.985438	0.00422701	2.39225	2.01303	0.107	2.38992	907172	2	2	8
6	PHA-665752	RPMI-8402	0.988345	0.00304123	2.22	1.53666	0.0994	46.5509	909702	2	2	8
6	PHA-665752	MZ2-MEL	0.993554	0.00175071	2.60183	0.770696	0.0052	23.7925	971777	2	2	8
6	PHA-665752	DU-4475	0.973487	0.00640314	2.88379	1.42933	0.011	29.97	906844	2	2	8
6	PHA-665752	SK-MEL-2	0.961208	0.00919006	2.95735	1.34084	0.0204	-5.46203	905955	2	2	8
6	PHA-665752	LB373-MEL-D	0.981952	0.00625405	3.06084	1.39042	0.007	13.9224	753581	2	2	8
6	PHA-665752	SU-DHL-8	0.989818	0.00249447	2.35177	1.54943	0.0806	25.4621	1331038	2	2	8
6	PHA-665752	KG-1	0.99491	0.0011629	2.53902	1.42098	0.023	57.4003	907278	2	2	8
6	PHA-665752	VA-ES-BJ	0.882829	0.0140153	2.55703	1.93552	0.4134	-1.03466	688121	2	2	8
6	PHA-665752	LU-65	0.995524	0.001073	2.82032	1.02343	0.004	55.8686	724863	2	2	8
6	PHA-665752	P116	0.935698	0.0101926	2.8386	2.3311	0.2282	8.35208	1330986	2	2	8
6	PHA-665752	NCI-H748	0.89882	0.0152122	2.95565	2.16741	0.2914	-2.59139	909194	2	2	8
6	PHA-665752	NEC8	0.867585	0.0139819	3.07815	1.92262	0.0444	-3.30578	910942	2	2	8
6	PHA-665752	HT-144	0.835507	0.0322423	1.0072	1.5115	0.8002	-19.3979	907067	2	2	8
6	PHA-665752	SF268	0.99486	0.00121775	2.77068	1.49238	0.0154	52.6625	905986	2	2	8
6	PHA-665752	HSC-39	0.973687	0.0063472	3.13242	1.93096	0.0106	24.8492	1322224	2	2	8
6	PHA-665752	SK-MM-2	0.993913	0.00158015	3.25609	1.76649	0.0046	36.0528	753612	2	2	8
6	PHA-665752	EW-24	0.995471	0.00103851	2.45315	0.977366	0.0042	56.3573	949168	2	2	8
6	PHA-665752	OMC-1	0.991865	0.00245173	2.75528	2.00789	0.006	36.5631	949154	2	2	8
6	PHA-665752	NCI-H82	0.970029	0.00636993	2.94353	1.49943	0.0216	11.601	688031	2	2	8
6	PHA-665752	NCI-H226	0.960181	0.00795485	3.2621	1.83522	0.0214	9.34032	905941	2	2	8
6	PHA-665752	SU-DHL-16	0.99193	0.00227762	3.04959	1.36809	0.0056	33.5541	1331034	2	2	8
6	PHA-665752	HOP-62	0.961465	0.00828253	2.7735	1.11889	0.0106	25.4298	905972	2	2	8
6	PHA-665752	CGTH-W-1	0.995223	0.0012669	2.98365	1.18665	0.005	32.0809	910568	2	2	8
6	PHA-665752	NCI-H524	0.911994	0.0122578	2.79374	1.95862	0.2702	-2.42238	908483	2	2	8
6	PHA-665752	SUP-M2	0.99408	0.0014474	2.81174	1.05063	0.0064	38.5297	1331040	2	2	8
6	PHA-665752	697	0.96595	0.00666764	2.415	1.77743	0.2522	4.30448	906800	2	2	8
6	PHA-665752	COR-L88	0.920863	0.011089	3.02192	2.0833	0.2138	5.10295	906808	2	2	8
6	PHA-665752	LB771-HNC	0.979304	0.00571397	2.92021	1.35346	0.0098	26.0056	753583	2	2	8
6	PHA-665752	COLO-668	0.928183	0.0115461	3.10933	1.61884	0.025	2.29477	910692	2	2	8
6	PHA-665752	CPC-N	0.882526	0.0143118	3.06987	2.23778	0.2104	2.88364	753547	2	2	8
6	PHA-665752	KARPAS-45	0.964468	0.00740105	1.26915	1.47223	0.5198	34.6903	907272	2	2	8
6	PHA-665752	SK-MEL-1	0.996068	0.000830104	2.62232	1.01586	0.0038	64.5575	909723	2	2	8
6	PHA-665752	RF-48	0.995315	0.00114627	2.68044	1.04487	0.0042	54.4584	909697	2	2	8
6	PHA-665752	SUP-HD1	0.945234	0.00872041	2.49387	1.83069	0.2816	14.7082	1331039	2	2	8
6	PHA-665752	NU-DUL-1	0.978952	0.00522071	3.17129	1.50413	0.0116	25.0957	1330982	2	2	8
6	PHA-665752	CAL-148	0.996033	0.000910701	2.20061	0.465741	0.0032	64.5575	924106	2	2	8
6	PHA-665752	NB5	0.986836	0.00358422	3.06248	1.40776	0.0126	21.3242	949176	2	2	8
6	PHA-665752	NCI-H345	0.990789	0.00279937	2.90905	1.68044	0.0084	42.2923	688021	2	2	8
6	PHA-665752	H9	0.915474	0.0165406	2.8687	2.16353	0.2878	-3.02751	907043	2	2	8
6	PHA-665752	ROS-50	0.934982	0.00991063	2.81665	1.6414	0.1624	4.64314	1331025	2	2	8
6	PHA-665752	MOLM-13	0.921267	0.0104893	2.22567	1.97531	0.4396	8.09701	1330947	2	2	8
6	PHA-665752	KS-1	0.860744	0.0144203	2.84258	1.94116	0.3406	7.84391	907313	2	2	8
6	PHA-665752	Toledo	0.972231	0.0065879	2.85259	1.68	0.0586	6.24806	1331046	2	2	8
6	PHA-665752	TE-10	0.896371	0.0133219	2.8095	2.03	0.2672	-5.22629	753622	2	2	8
6	PHA-665752	NMC-G1	0.952981	0.00895424	3.03694	1.7632	0.021	13.7772	908449	2	2	8
6	PHA-665752	MN-60	0.990348	0.00289498	2.91172	1.28881	0.008	42.3853	908143	2	2	8
6	PHA-665752	WSU-NHL	0.971161	0.00667651	2.89329	1.15842	0.0128	22.9173	909785	2	2	8
6	PHA-665752	BE-13	0.776378	0.0184255	2.07092	1.78981	0.6736	-3.13232	906763	2	2	8
6	PHA-665752	BB30-HNC	0.98673	0.00316179	2.53536	1.57679	0.0914	23.7886	753531	2	2	8
6	PHA-665752	NCI-H211	0.974646	0.00561714	2.56573	1.71017	0.1316	6.11756	1240189	2	2	8
6	PHA-665752	ES8	0.992356	0.00181947	2.56812	1.99132	0.0504	33.2892	949155	2	2	8
6	PHA-665752	LB1047-RCC	0.87315	0.0188597	1.83771	1.63722	0.6132	-12.1768	753577	2	2	8
6	PHA-665752	MY-M12	0.995114	0.0013514	2.54694	1.65185	0.0258	47.9211	1330960	2	2	8
6	PHA-665752	CMK	0.99611	0.000858675	2.80869	1.29677	0.0062	64.5575	910566	2	2	8
6	PHA-665752	NCI-H1581	0.988192	0.00338742	3.14389	2.09379	0.0098	35.509	908471	2	2	8
6	PHA-665752	OCI-M1	0.990539	0.00286834	2.93709	1.8175	0.0048	40.378	1330985	2	2	8
6	PHA-665752	Hs-445	0.97084	0.00649397	3.20717	1.66675	0.0122	19.0441	1322218	2	2	8
6	PHA-665752	VCaP	0.99009	0.00239724	2.69573	1.8975	0.0484	17.3687	1299075	2	2	8
6	PHA-665752	SLVL	0.991353	0.00250169	2.69051	1.1435	0.0088	35.2015	1331032	2	2	8
6	PHA-665752	P30-OHK	0.943386	0.00970783	2.99058	1.39704	0.0194	11.5368	909252	2	2	8
9	MG-132	KMS-12-BM	0.761411	0.0203996	-0.657017	0.0759645	1	11.0224	907281	2	1	8
9	MG-132	SR	0.844431	0.00753362	-0.402357	0.0231329	1	17.0304	905965	2	1	8
9	MG-132	CMK	0.701993	0.021756	-0.8003	0.060649	1	7.15466	910566	2	1	8
9	MG-132	NB69	0.77432	0.0209332	-0.592958	0.0750488	1	7.60418	908440	2	1	8
9	MG-132	SUP-B15	0.51513	0.0285881	-1.31448	0.105941	1	-11.3684	1247871	2	1	8
9	MG-132	CCRF-CEM	0.791214	0.0102922	-0.517434	0.0332517	1	0.986204	905952	2	1	8
9	MG-132	HCC2218	0.976462	0.00498613	1.53096	1.56338	0.2692	29.9798	749716	2	1	8
9	MG-132	SKM-1	0.955699	0.00799252	1.97257	1.91849	0.2688	38.8148	909722	2	1	8
9	MG-132	P3HR-1	0.814641	0.0080817	-0.494108	0.0263214	1	17.6051	1330988	2	1	8
9	MG-132	CW-2	0.866605	0.0148322	2.41058	1.9956	0.3896	0.595593	910554	2	1	8
9	MG-132	Kasumi-3	0.994244	0.00138213	2.11842	0.729755	0.0062	38.3079	1327776	2	1	8
9	MG-132	SK-ES-1	0.965329	0.00601314	0.815447	1.29534	0.5516	41.5702	684072	2	1	8
9	MG-132	EW-12	0.939857	0.0101708	2.913	1.74132	0.0202	0.772779	949162	2	1	8
9	MG-132	SNB75	0.818312	0.0219496	-0.214818	0.0712761	0.9992	-14.7229	905982	2	1	8
9	MG-132	COLO-684	0.909629	0.010214	0.20669	0.97222	0.8074	33.6672	910691	2	1	8
9	MG-132	MEC-1	0.808641	0.00673366	-0.492981	0.0220066	1	15.566	1330943	2	1	8
9	MG-132	NCI-H1694	0.995365	0.00117267	2.57887	2.06108	0.0166	47.3895	688006	2	1	8
9	MG-132	L-428	0.896043	0.00838868	-0.226267	0.033682	1	8.41855	907322	2	1	8
9	MG-132	NB12	0.827653	0.0203849	-0.322341	0.0678464	1	-11.5655	949172	2	1	8
9	MG-132	NCI-H748	0.967907	0.00987054	0.962941	1.4805	0.4696	32.3409	909194	2	1	8
9	MG-132	ES1	0.831129	0.0166017	2.54072	1.94206	0.3546	0.0350008	949158	2	1	8
9	MG-132	NCI-H1304	0.884116	0.00769752	-0.283135	0.0283851	1	24.7744	753599	2	1	8
9	MG-132	NCI-H1436	0.951865	0.00774741	0.0342375	0.292498	0.9638	29.9282	908469	2	1	8
9	MG-132	JAR	0.960484	0.00686582	0.93049	1.3255	0.5148	23.5509	907175	2	1	8
9	MG-132	OPM-2	0.659251	0.0135283	-0.948469	0.0501687	1	7.29285	909249	2	1	8
9	MG-132	ES8	0.753369	0.013639	-0.58339	0.0479856	1	-11.8821	949155	2	1	8
9	MG-132	NB13	0.674478	0.0212126	-0.880297	0.0819162	1	4.01707	949177	2	1	8
9	MG-132	JURL-MK1	0.943065	0.0067398	-0.0520319	0.0738481	0.9958	19.2472	1327771	2	1	8
9	MG-132	SF126	0.769998	0.0134436	-0.577298	0.04142	1	9.95343	909712	2	1	8
9	MG-132	ES4	0.87674	0.0133504	-0.211228	0.0456543	1	-9.3145	949156	2	1	8
9	MG-132	NU-DUL-1	0.882933	0.0131121	-0.280354	0.0362779	1	11.8059	1330982	2	1	8
9	MG-132	P116	0.96965	0.00642924	2.83818	1.46692	0.0154	16.0784	1330986	2	1	8
9	MG-132	K-562	0.73231	0.0178655	-0.550071	0.0917258	0.9978	2.10143	905940	2	1	8
9	MG-132	DG-75	0.987684	0.00334556	2.53287	1.56015	0.03	23.2023	906838	2	1	8
9	MG-132	SCC-15	0.975798	0.0055683	2.75078	1.85773	0.081	22.0695	910911	2	1	8
9	MG-132	NCI-H1838	0.992389	0.00211694	2.73835	1.44213	0.0062	38.0343	687807	2	1	8
9	MG-132	CA46	0.967517	0.00655651	2.29852	1.79344	0.1626	38.7547	910703	2	1	8
9	MG-132	Daudi	0.815151	0.0115196	-0.362364	0.0283651	1	-12.3099	906831	2	1	8
9	MG-132	A4-Fuk	0.755215	0.00851809	-0.661923	0.0270553	1	11.3191	910934	2	1	8
9	MG-132	H9	0.752631	0.00981363	-0.608695	0.0282973	1	-14.2436	907043	2	1	8
9	MG-132	LS-411N	0.713954	0.018824	-0.295918	0.0599659	0.9998	-20.6297	907794	2	1	8
9	MG-132	LOUCY	0.674389	0.0117799	-0.78182	0.0340638	1	-7.71545	907789	2	1	8
9	MG-132	MS-1	0.987796	0.00345655	2.89232	1.40504	0.0084	36.6954	753594	2	1	8
9	MG-132	KASUMI-1	0.985229	0.00353278	1.69836	1.65737	0.1854	48.4154	907275	2	1	8
9	MG-132	CL-11	0.949506	0.007728	0.952406	1.51089	0.5906	30.125	1290769	2	1	8
9	MG-132	SU-DHL-4	0.627833	0.0465116	-1.00747	0.158328	1	-4.78455	1331035	2	1	8
9	MG-132	EW-22	0.9575	0.00816482	2.9791	1.69303	0.025	2.70962	949167	2	1	8
9	MG-132	NB4	0.78851	0.0127832	-0.494781	0.0434952	1	1.03451	1323913	2	1	8
9	MG-132	NCI-H23	0.915448	0.00961664	0.0648175	0.645299	0.8878	35.6944	905942	2	1	8
9	MG-132	MSTO-211H	0.907098	0.0149831	1.46292	1.70409	0.614	-0.891259	908152	2	1	8
9	MG-132	IST-SL1	0.745334	0.0131258	-0.679615	0.0566697	0.9998	-0.642529	753564	2	1	8
9	MG-132	NCI-H2141	0.890111	0.00852771	-0.257253	0.0362859	1	29.9472	688014	2	1	8
9	MG-132	EM-2	0.716593	0.0192219	0.150749	1.62261	0.9066	-12.2175	906855	2	1	8
9	MG-132	KM-H2	0.734114	0.00734524	-0.714957	0.0227296	1	12.7833	909976	2	1	8
9	MG-132	GCIY	0.746285	0.0468996	-0.540333	0.195938	0.9996	-24.2685	906869	2	1	8
9	MG-132	NB1	0.814816	0.0196472	-0.433753	0.0717787	1	-12.1466	949179	2	1	8
9	MG-132	RH-1	0.951249	0.00838243	1.82034	1.62152	0.3004	37.4104	971773	2	1	8
9	MG-132	OCI-M1	0.7112	0.00756955	-0.780982	0.023118	1	4.4952	1330985	2	1	8
9	MG-132	HAL-01	0.799164	0.0306941	-0.521344	0.100245	1	6.54919	949153	2	1	8
9	MG-132	A101D	0.475395	0.0160377	-1.47266	0.110558	0.9974	-1.39668	910921	2	1	8
9	MG-132	NCI-SNU-5	0.904581	0.00962294	-0.121951	0.187859	0.9964	16.3065	908445	2	1	8
9	MG-132	EC-GI-10	0.976002	0.00504188	2.06266	1.88738	0.1976	21.1341	753555	2	1	8
9	MG-132	KNS-81-FD	0.747159	0.0172149	-0.520374	0.0917145	0.997	-9.03854	924188	2	1	8
9	MG-132	D-283MED	0.914854	0.0132692	1.7114	1.7121	0.4656	-4.56577	906834	2	1	8
9	MG-132	HCC-33	0.896522	0.00893595	-0.231626	0.0366266	1	30.5751	1303901	2	1	8
9	MG-132	D-336MG	0.576943	0.0547512	-1.25519	0.571826	0.9916	-36.6444	946369	2	1	8
9	MG-132	NCI-H1648	0.923698	0.00966838	0.133552	0.580253	0.9408	5.45464	687799	2	1	8
9	MG-132	RPMI-8402	0.886186	0.0132362	-0.269463	0.0385701	1	15.5442	909702	2	1	8
9	MG-132	OCI-AML5	0.795508	0.0452506	-0.542449	0.148092	1	3.09112	1330983	2	1	8
9	MG-132	NCI-H1963	0.860939	0.00999612	-0.342888	0.0337665	1	0.383755	688010	2	1	8
9	MG-132	NCI-H2081	0.902163	0.0167592	1.26039	1.71458	0.6376	-0.00552958	908480	2	1	8
9	MG-132	UACC-257	0.600478	0.0178436	-0.852867	0.0725946	0.9996	-7.04523	905977	2	1	8
9	MG-132	LC4-1	0.835604	0.0109182	-0.401515	0.0504962	1	15.1003	907787	2	1	8
9	MG-132	RPMI-8866	0.791888	0.0246063	-0.552677	0.0748621	1	9.89295	910544	2	1	8
9	MG-132	Becker	0.854503	0.0182558	-0.293595	0.0454132	1	-10.9324	906746	2	1	8
9	MG-132	SBC-1	0.969472	0.0051751	0.846182	1.31914	0.5806	5.58638	713885	2	1	8
9	MG-132	NCI-H1395	0.953481	0.0155285	1.76675	1.93927	0.242	-5.49362	684681	2	1	8
9	MG-132	MZ1-PC	0.77766	0.0588129	-0.307901	0.252296	0.9994	-17.9399	753595	2	1	8
9	MG-132	HCC1599	0.985638	0.00426291	2.9565	1.58906	0.0102	1.82279	749713	2	1	8
9	MG-132	HH	0.844735	0.00901194	-0.424084	0.0337375	1	24.7287	907056	2	1	8
9	MG-132	KARPAS-422	0.786075	0.00805777	-0.561852	0.024494	1	7.5216	907274	2	1	8
9	MG-132	ES-2	0.868805	0.00863395	-0.335602	0.0302332	1	26.2963	1240128	2	1	8
9	MG-132	MEG-01	0.829409	0.00984304	-0.420301	0.0298337	1	-6.43623	908126	2	1	8
9	MG-132	NCI-H1355	0.748595	0.0176198	-0.3452	0.0359143	1	-25.0885	724866	2	1	8
9	MG-132	PF-382	0.716899	0.00956688	-0.757441	0.0318853	1	17.3784	909260	2	1	8
9	MG-132	Ramos-2G6-4C10	0.76715	0.0144375	-0.606373	0.0405919	1	-5.71621	910401	2	1	8
9	MG-132	NCI-H1770	0.962634	0.0078109	2.67011	1.54961	0.0198	14.1898	687804	2	1	8
9	MG-132	LS-1034	0.965795	0.00588392	0.595882	1.12518	0.6594	22.9073	917486	2	1	8
9	MG-132	CAS-1	0.587888	0.0249574	-1.23558	0.799362	0.9846	-21.54	910943	2	1	8
9	MG-132	NCI-H1836	0.920948	0.00959193	0.675539	1.27446	0.7458	7.12132	1240182	2	1	8
9	MG-132	MRK-nu-1	0.848792	0.0078157	-0.381808	0.0260866	1	3.80203	908151	2	1	8
9	MG-132	SK-PN-DW	0.735975	0.0171102	-0.650224	0.0674779	1	-2.27138	909731	2	1	8
9	MG-132	J-RT3-T3-5	0.925054	0.0109708	1.49169	1.73983	0.5312	-2.79405	907391	2	1	8
9	MG-132	THP-1	0.993054	0.00175911	2.48255	1.03558	0.0076	32.3335	909771	2	1	8
9	MG-132	NCI-H510A	0.800584	0.0554154	-0.520299	0.166561	1	-0.484803	753605	2	1	8
9	MG-132	NCI-H322M	0.875884	0.0194823	1.83281	1.93189	0.4174	-10.5715	905967	2	1	8
9	MG-132	GAK	0.726334	0.0157295	-0.631894	0.0425185	1	-1.49156	910932	2	1	8
9	MG-132	EW-11	0.750532	0.0208682	1.56344	1.74319	0.7244	-14.5731	684062	2	1	8
9	MG-132	NCI-H1417	0.980835	0.00496923	2.27552	1.07518	0.0098	28.7163	688001	2	1	8
9	MG-132	EB-3	0.916984	0.00867312	-0.127783	0.0339898	1	4.60974	906847	2	1	8
9	MG-132	TK10	0.753131	0.0169511	-0.642587	0.0473896	1	3.70425	905980	2	1	8
9	MG-132	SHP-77	0.921708	0.0110581	1.66762	1.80771	0.5238	1.10382	724872	2	1	8
9	MG-132	NCI-H2227	0.835413	0.0123809	-0.255094	0.0334389	1	-9.12731	688018	2	1	8
9	MG-132	SCC-3	0.728364	0.0114451	-0.628755	0.0319542	1	-11.747	910930	2	1	8
9	MG-132	Raji	0.894912	0.0107168	-0.125378	0.119122	0.9986	13.1368	909262	2	1	8
9	MG-132	K5	0.936454	0.00684668	-0.0961138	0.0375976	1	24.6969	924238	2	1	8
9	MG-132	NKM-1	0.935663	0.00670418	-0.0962732	0.0868077	0.9994	16.8342	908448	2	1	8
9	MG-132	RC-K8	0.955935	0.00745482	0.12544	0.55848	0.9136	31.2618	1330995	2	1	8
9	MG-132	MKL-1-subclone-2	0.911076	0.019194	-0.193893	0.0677373	1	19.0149	1333014	2	1	8
9	MG-132	BB65-RCC	0.752003	0.0198438	-0.576689	0.0504591	1	2.08347	753533	2	1	8
9	MG-132	BL-41	0.538661	0.0118653	-1.12382	0.0309922	1	2.43397	910706	2	1	8
9	MG-132	LS-513	0.996089	0.000843647	2.6015	1.42568	0.0036	64.5575	907795	2	1	8
9	MG-132	P31-FUJ	0.99405	0.00141945	2.02424	1.46821	0.0468	54.5892	909253	2	1	8
9	MG-132	HL-60	0.881964	0.00798819	-0.291121	0.0285397	1	24.9147	905938	2	1	8
9	MG-132	QIMR-WIL	0.845744	0.00825003	-0.387585	0.0286182	1	0.234982	910545	2	1	8
9	MG-132	WIL2-NS	0.633217	0.0369868	-0.969762	0.130381	1	-21.2778	1331049	2	1	8
9	MG-132	COLO-320-HSR	0.955245	0.00627704	0.236362	0.714083	0.8572	38.4845	910569	2	1	8
9	MG-132	TE-441-T	0.839827	0.0163094	2.66001	1.92059	0.2596	-6.44101	924248	2	1	8
9	MG-132	KP-N-YS	0.975341	0.00590092	2.95904	1.73921	0.0194	8.51913	946363	2	1	8
9	MG-132	LU-165	0.963245	0.00579211	0.522998	1.08209	0.7274	17.0525	753589	2	1	8
9	MG-132	SUP-T1	0.985579	0.00378546	2.66473	1.52851	0.0086	31.0307	909743	2	1	8
9	MG-132	NCI-H1092	0.827517	0.0113919	-0.40839	0.0492796	1	8.81967	687997	2	1	8
9	MG-132	DJM-1	0.793291	0.0133779	-0.387654	0.0331266	1	-16.2704	906841	2	1	8
9	MG-132	L-1236	0.739429	0.0146039	-0.54799	0.0429718	1	-3.36814	1330935	2	1	8
9	MG-132	EW-16	0.950373	0.00677562	0.255884	0.776086	0.8396	2.95694	949165	2	1	8
9	MG-132	SW954	0.93971	0.00797137	-0.0801032	0.0515321	0.999	12.0427	924247	2	1	8
9	MG-132	OCI-AML3	0.80936	0.025421	-0.503668	0.0794844	1	11.3818	1290455	2	1	8
9	MG-132	KALS-1	0.773796	0.0150493	-0.421865	0.0420136	1	-5.83295	907271	2	1	8
9	MG-132	NCI-H226	0.977238	0.00576525	2.22284	0.948827	0.0106	28.3269	905941	2	1	8
9	MG-132	SCLC-21H	0.950135	0.00622367	-0.0137939	0.127317	0.9898	20.6638	753611	2	1	8
9	MG-132	NCI-H209	0.937142	0.00940169	1.28583	1.6	0.5634	19.6416	688013	2	1	8
9	MG-132	NCI-H847	0.722944	0.0220346	-0.729352	0.0782402	1	3.57408	1240193	2	1	8
9	MG-132	LC-1F	0.769201	0.0207594	0.758535	1.45971	0.843	-8.25304	907785	2	1	8
9	MG-132	CAL-148	0.900219	0.0127887	1.22817	1.61862	0.655	-0.792594	924106	2	1	8
9	MG-132	LU-139	0.8325	0.015604	-0.33025	0.0453591	1	-7.37138	713878	2	1	8
9	MG-132	BB30-HNC	0.727191	0.0386763	-0.656111	0.121841	1	-21.6933	753531	2	1	8
9	MG-132	MZ7-mel	0.764997	0.0130315	-0.568732	0.0555141	1	-0.760067	753596	2	1	8
9	MG-132	HT	0.870857	0.0122186	-0.322251	0.0370636	1	11.9966	907063	2	1	8
9	MG-132	GR-ST	0.755129	0.0302376	1.87603	1.87612	0.5018	-18.4612	906877	2	1	8
9	MG-132	SU-DHL-8	0.663852	0.0164903	-0.747381	0.0513622	1	-8.18445	1331038	2	1	8
9	MG-132	HUTU-80	0.765121	0.0151982	-0.576424	0.0531885	1	-14.432	907073	2	1	8
9	MG-132	TE-9	0.664292	0.0205011	-0.520303	0.0581717	0.9996	-17.4197	946353	2	1	8
9	MG-132	IST-SL2	0.730782	0.0323119	-0.680993	0.10082	1	-12.1197	753565	2	1	8
9	MG-132	LP-1	0.681633	0.0192036	-0.793417	0.0653585	1	-12.5239	907791	2	1	8
9	MG-132	LB831-BLC	0.693997	0.025396	-0.694682	0.0859808	1	-15.728	753584	2	1	8
9	MG-132	SLVL	0.768087	0.0219986	-0.612325	0.0689528	1	-0.878972	1331032	2	1	8
9	MG-132	MDA-MB-134-VI	0.975215	0.00642788	2.58554	1.2884	0.014	6.89132	908119	2	1	8
9	MG-132	CP66-MEL	0.53643	0.0168471	-1.12611	0.0843035	0.9992	-4.77967	753546	2	1	8
9	MG-132	HEL	0.708273	0.0124507	-0.732638	0.040786	1	4.58466	907053	2	1	8
9	MG-132	D-542MG	0.558575	0.0163305	-1.15007	0.128984	0.9934	-17.3495	753549	2	1	8
9	MG-132	NB17	0.741991	0.0110539	-0.610645	0.0319726	1	-10.4169	949175	2	1	8
9	MG-132	MOLP-8	0.76459	0.00978225	-0.62813	0.0341667	1	13.7208	1330950	2	1	8
9	MG-132	NCI-H2135	0.95763	0.00609902	0.35734	0.840536	0.792	9.03511	1298352	2	1	8
9	MG-132	EVSA-T	0.772622	0.0097801	-0.618883	0.032381	1	22.159	906862	2	1	8
9	MG-132	EKVX	0.849254	0.0145004	0.171817	0.768814	0.938	-6.4713	905970	2	1	8
9	MG-132	IM-9	0.968336	0.00691935	1.95906	1.71864	0.1352	12.0493	753563	2	1	8
9	MG-132	YT	0.961283	0.00712959	2.02254	1.95757	0.291	13.231	946358	2	1	8
9	MG-132	RXF393	0.723763	0.0227614	-0.679098	0.0945865	0.9998	-20.989	905978	2	1	8
9	MG-132	COR-L95	0.927258	0.0202286	1.71316	1.83499	0.499	-3.71981	1297439	2	1	8
9	MG-132	HC-1	0.646701	0.0472677	-0.88003	0.14371	1	-20.3818	907044	2	1	8
9	MG-132	CTV-1	0.779068	0.0088423	-0.560202	0.027887	1	6.28094	753548	2	1	8
9	MG-132	MDST8	0.963252	0.0055803	0.347825	0.856371	0.7974	33.9553	1240173	2	1	8
9	MG-132	EW-3	0.895977	0.0136948	3.05309	1.66763	0.0494	4.48019	949161	2	1	8
9	MG-132	KP-N-YN	0.828865	0.0225164	-0.264714	0.143897	0.998	-10.158	907314	2	1	8
9	MG-132	MONO-MAC-6	0.886571	0.0105341	-0.256997	0.158647	0.9952	29.9553	908148	2	1	8
9	MG-132	KMOE-2	0.865899	0.00853777	-0.340577	0.0291317	1	25.1698	907280	2	1	8
9	MG-132	GDM-1	0.737012	0.0242007	-0.70542	0.0910898	1	-5.22519	906870	2	1	8
9	MG-132	TC-71	0.936718	0.00902977	-0.0645972	0.118732	0.9956	20.0794	1240221	2	1	8
9	MG-132	MMAC-SF	0.589016	0.0145446	-1.12032	0.053339	1	-11.0372	925339	2	1	8
9	MG-132	L-363	0.733028	0.00971989	-0.706422	0.0321456	1	3.73427	924239	2	1	8
9	MG-132	NCI-H716	0.870519	0.0151573	2.6785	1.84023	0.1032	-9.09972	908458	2	1	8
9	MG-132	COLO-668	0.849884	0.0247158	2.85351	1.91203	0.0668	-13.4939	910692	2	1	8
9	MG-132	MV-4-11	0.845452	0.00943381	-0.387665	0.0319039	1	10.0611	908156	2	1	8
9	MG-132	ONS-76	0.672911	0.0117671	-0.894552	0.0478604	1	1.94429	909248	2	1	8
9	MG-132	MLMA	0.995341	0.00119009	2.13005	1.31645	0.0154	47.0491	908142	2	1	8
9	MG-132	NCI-H747	0.79731	0.0138044	-0.442203	0.0629612	0.9996	-1.43491	908457	2	1	8
9	MG-132	K052	0.793663	0.0105433	-0.521904	0.0351664	1	8.76284	907284	2	1	8
9	MG-132	LB647-SCLC	0.937902	0.00693789	-0.0828388	0.0734089	0.9966	32.5513	753582	2	1	8
9	MG-132	SCH	0.994844	0.00118674	2.47293	1.6685	0.0258	57.1285	909711	2	1	8
9	MG-132	D-392MG	0.714634	0.0141354	-0.669983	0.0434137	1	3.62907	946370	2	1	8
9	MG-132	SU-DHL-16	0.730792	0.00932183	-0.709041	0.0316289	1	9.53876	1331034	2	1	8
9	MG-132	MOLT-4	0.778516	0.00855737	-0.562426	0.0253665	1	-11.1282	905958	2	1	8
9	MG-132	GRANTA-519	0.886383	0.00793751	-0.257552	0.0271811	1	-5.9652	1303897	2	1	8
9	MG-132	NCI-H1876	0.849321	0.0202092	-0.237962	0.0798918	0.998	-0.870222	1330972	2	1	8
9	MG-132	SK-N-DZ	0.91674	0.010463	0.727305	1.3416	0.7608	-2.39744	688086	2	1	8
9	MG-132	KE-37	0.673088	0.0127687	-0.882947	0.0369842	1	8.79088	907277	2	1	8
9	MG-132	SF539	0.992105	0.00228667	2.7368	1.4632	0.0066	37.1291	905984	2	1	8
9	MG-132	JVM-2	0.862913	0.0159219	1.14336	1.56536	0.7398	-7.92967	907269	2	1	8
9	MG-132	KG-1	0.765029	0.0317091	-0.614043	0.104651	1	6.99892	907278	2	1	8
9	MG-132	NCI-H446	0.970795	0.00655127	2.46117	1.71008	0.0386	8.35729	688023	2	1	8
9	MG-132	NB10	0.812082	0.0330939	-0.457555	0.138837	0.9998	-9.92596	949171	2	1	8
9	MG-132	NCI-H1666	0.867054	0.0164296	2.32664	1.91178	0.3838	-4.05204	908473	2	1	8
9	MG-132	NCI-H2171	0.908292	0.0117801	2.58476	1.98155	0.1644	-0.404926	688015	2	1	8
9	MG-132	NEC8	0.606673	0.0158962	-1.02239	0.0407061	1	-6.11199	910942	2	1	8
9	MG-132	PL-21	0.951671	0.00582765	-0.01476	0.100051	0.9896	33.9075	1330991	2	1	8
9	MG-132	SNU-C1	0.990081	0.00347396	2.64614	1.50592	0.0066	12.2278	910905	2	1	8
9	MG-132	BE2-M17	0.887604	0.00904853	-0.245583	0.0422392	1	14.4539	753616	2	1	8
9	MG-132	NALM-6	0.757622	0.0115207	-0.627444	0.036998	1	-8.86832	908158	2	1	8
9	MG-132	RCC10RGB	0.847354	0.0294389	2.08806	1.92659	0.5388	-18.7862	909974	2	1	8
9	MG-132	CHP-126	0.833881	0.0229323	-0.348723	0.124002	0.9998	-7.42398	910567	2	1	8
9	MG-132	A498	0.802389	0.0370252	1.16618	1.82686	0.722	-10.4802	905948	2	1	8
9	MG-132	ACN	0.736831	0.012174	-0.617755	0.0386092	1	-3.53358	906803	2	1	8
9	MG-132	KGN	0.832431	0.0148686	-0.230991	0.0462997	1	-4.01965	924186	2	1	8
9	MG-132	KELLY	0.782588	0.00809482	-0.572727	0.027301	1	18.0878	753618	2	1	8
9	MG-132	HD-MY-Z	0.772897	0.0126964	-0.612775	0.0530557	1	19.6573	907050	2	1	8
9	MG-132	GOTO	0.990598	0.00238933	2.05619	1.47098	0.0724	27.6776	906875	2	1	8
9	MG-132	HCC1500	0.791751	0.0178219	2.54905	2.00871	0.3758	-5.58421	1303900	2	1	8
9	MG-132	HCC2998	0.70578	0.0337441	-0.709311	0.145362	1	-9.92062	905971	2	1	8
9	MG-132	SIG-M5	0.759197	0.0220748	-0.641239	0.0689061	1	6.13128	909715	2	1	8
9	MG-132	HDLM-2	0.837775	0.0159313	-0.366868	0.0559859	1	4.96806	924110	2	1	8
9	MG-132	LB2241-RCC	0.694365	0.0234035	-0.768005	0.060981	0.9998	-9.10862	753578	2	1	8
9	MG-132	SW872	0.686125	0.0175364	-0.632923	0.0520973	0.9996	-17.7591	909756	2	1	8
9	MG-132	TF-1	0.7819	0.0204135	-0.495264	0.0636715	1	-11.1083	1331044	2	1	8
9	MG-132	SW684	0.794431	0.016358	-0.328463	0.0418226	1	-9.77245	909754	2	1	8
9	MG-132	DND-41	0.724433	0.0112059	-0.652688	0.0316467	1	-0.962036	1297446	2	1	8
9	MG-132	NOMO-1	0.954237	0.0060156	0.0958641	0.482156	0.9458	37.2717	908451	2	1	8
9	MG-132	WSU-DLCL2	0.864977	0.0275771	-0.00793346	0.935494	0.9062	6.96177	1331050	2	1	8
9	MG-132	DU-4475	0.670458	0.0127719	-0.80393	0.0356965	1	-6.6699	906844	2	1	8
9	MG-132	ES6	0.379126	0.0154746	-1.75785	0.0700811	0.9998	-2.61929	949157	2	1	8
9	MG-132	no-11	0.678877	0.0277645	-0.57952	0.491233	0.9848	-13.4773	908450	2	1	8
9	MG-132	NOS-1	0.864233	0.0200849	-0.19312	0.0692433	1	-7.37681	925345	2	1	8
9	MG-132	CTB-1	0.883531	0.0116679	0.0330428	0.856303	0.945	2.75292	949088	2	1	8
9	MG-132	SK-NEP-1	0.872937	0.0159163	2.73236	2.05075	0.1788	-8.34864	909730	2	1	8
9	MG-132	HA7-RCC	0.899702	0.0107996	0.0892135	0.732671	0.945	-3.93287	753558	2	1	8
9	MG-132	BC-1	0.917525	0.00604341	-0.176256	0.0227573	1	3.21123	910919	2	1	8
9	MG-132	DSH1	0.484	0.0111147	-1.47373	0.0303434	1	7.30198	753552	2	1	8
9	MG-132	COLO-824	0.837949	0.0148776	2.24862	1.85891	0.474	-3.45436	906812	2	1	8
9	MG-132	PSN1	0.680462	0.014923	-0.88343	0.0518071	1	1.57413	910546	2	1	8
9	MG-132	NCI-H2126	0.900652	0.0102687	-0.155338	0.263323	0.9856	32.5953	687814	2	1	8
9	MG-132	SH-4	0.538103	0.0125086	-1.31664	0.0450778	1	-2.3036	909713	2	1	8
9	MG-132	NCI-H187	0.967934	0.00729723	2.465	1.19822	0.0142	25.0347	688007	2	1	8
9	MG-132	HCC2157	0.769893	0.0108262	-0.615588	0.0351568	1	7.46064	749715	2	1	8
9	MG-132	NK-92MI	0.766362	0.0104941	-0.568759	0.0316322	1	-1.58702	1330981	2	1	8
9	MG-132	NCI-H2196	0.96886	0.00544131	0.632599	1.14266	0.639	37.293	908481	2	1	8
9	MG-132	LU-134-A	0.896436	0.0228641	-0.241944	0.0786314	1	17.4087	753588	2	1	8
9	MG-132	COR-L279	0.859506	0.0136169	-0.281256	0.0493205	1	-15.4007	910937	2	1	8
9	MG-132	COR-L88	0.952791	0.00861546	1.46441	1.64407	0.3826	8.7714	906808	2	1	8
9	MG-132	TE-5	0.722439	0.0106172	-0.771189	0.0363118	1	10.4039	735784	2	1	8
9	MG-132	CESS	0.722573	0.00806861	-0.74525	0.0264578	1	15.3622	910688	2	1	8
9	MG-132	MFM-223	0.975272	0.00485613	1.36587	1.72991	0.3316	37.7363	910948	2	1	8
9	MG-132	SF268	0.818024	0.0145601	-0.386758	0.0430114	1	-22.3512	905986	2	1	8
9	MG-132	GI-ME-N	0.664067	0.0212015	-0.730947	0.207718	0.9886	-17.0594	906872	2	1	8
9	MG-132	RL95-2	0.855357	0.013918	-0.328925	0.0518405	1	-8.04288	930082	2	1	8
9	MG-132	ALL-PO	0.668809	0.0225616	-0.808736	0.0750337	1	-19.4583	910944	2	1	8
9	MG-132	RS4-11	0.851787	0.015316	3.11083	1.84886	0.0488	-2.4043	909703	2	1	8
9	MG-132	SU-DHL-1	0.859677	0.0149529	-0.241079	0.0432545	1	-7.09825	909742	2	1	8
9	MG-132	ES5	0.919985	0.0101448	2.00281	1.91574	0.4276	5.1912	684057	2	1	8
9	MG-132	ETK-1	0.993118	0.00254132	1.8067	1.51551	0.066	40.466	906861	2	1	8
9	MG-132	RF-48	0.820088	0.0130839	-0.282694	0.0314592	1	-13.8881	909697	2	1	8
9	MG-132	NCI-H1975	0.701546	0.0111288	-0.81069	0.0425678	1	18.5419	924244	2	1	8
9	MG-132	ECC4	0.989978	0.0028216	2.75805	1.46615	0.0098	25.9977	906850	2	1	8
9	MG-132	SK-MM-2	0.770023	0.00911977	-0.584848	0.0281531	1	-7.32421	753612	2	1	8
9	MG-132	8-MG-BA	0.680101	0.00998201	-0.796438	0.0309432	1	9.78791	687562	2	1	8
9	MG-132	NCI-SNU-16	0.928986	0.00730535	-0.12569	0.0389874	1	9.8691	908446	2	1	8
9	MG-132	SK-UT-1	0.547134	0.013821	-1.1566	0.0480459	1	-16.1564	909732	2	1	8
9	MG-132	EoL-1-cell	0.779198	0.0213292	2.328	1.90739	0.503	-13.2416	906856	2	1	8
9	MG-132	JJN-3	0.688129	0.00865612	-0.83566	0.0261158	1	1.28396	1327766	2	1	8
9	MG-132	TE-12	0.846334	0.0157845	-0.239288	0.0693	1	-6.54089	946356	2	1	8
9	MG-132	MPP-89	0.654974	0.034042	-0.852596	0.188896	0.9982	-12.2744	908150	2	1	8
9	MG-132	IST-MES1	0.855427	0.0100285	-0.285649	0.0302203	1	-12.3932	907173	2	1	8
9	MG-132	KNS-42	0.521352	0.014144	-1.28078	0.0572225	1	-8.58801	907282	2	1	8
9	MG-132	OCI-LY-19	0.870121	0.0155751	-0.316497	0.051406	1	10.0032	1330984	2	1	8
9	MG-132	DMS-79	0.993443	0.00170542	2.45434	1.47578	0.0056	39.0034	753551	2	1	8
9	MG-132	TK	0.76164	0.0215714	-0.613641	0.0838102	1	-9.24769	1331045	2	1	8
9	MG-132	GI-1	0.723625	0.0187523	-0.332072	0.0391085	1	-29.5855	906871	2	1	8
9	MG-132	RPMI-6666	0.868066	0.00865416	-0.285117	0.0265366	1	-14.9758	909701	2	1	8
9	MG-132	NCI-H526	0.924576	0.0268348	1.16209	1.71232	0.584	18.4905	688025	2	1	8
9	MG-132	BE-13	0.972694	0.00665995	2.4716	1.56335	0.0122	27.8014	906763	2	1	8
9	MG-132	JiyoyeP-2003	0.932589	0.00570344	-0.131955	0.0246419	1	21.8623	907268	2	1	8
9	MG-132	NCI-H82	0.874349	0.0197319	-0.190297	0.176497	0.9968	-5.14376	688031	2	1	8
9	MG-132	KY821	0.98931	0.00293217	2.69123	1.4207	0.0058	27.2889	907300	2	1	8
9	MG-132	SUP-M2	0.736616	0.0215215	-0.758384	0.0836875	1	7.99692	1331040	2	1	8
9	MG-132	L-540	0.693389	0.0536182	-0.813918	0.165004	1	-8.61915	907323	2	1	8
9	MG-132	MZ2-MEL	0.681881	0.0144172	-0.733742	0.051551	1	-10.777	971777	2	1	8
9	MG-132	GB-1	0.69907	0.0198815	-0.545773	0.0531084	0.9998	-28.4868	687568	2	1	8
9	MG-132	SK-LMS-1	0.70864	0.0122749	-0.701636	0.0376522	1	-9.65515	909720	2	1	8
9	MG-132	KARPAS-45	0.752005	0.0111842	-0.597802	0.0343403	1	-4.35505	907272	2	1	8
9	MG-132	NCI-H220	0.751511	0.0160599	-0.541813	0.0440486	1	-11.1802	1330974	2	1	8
9	MG-132	KURAMOCHI	0.904618	0.0100715	-0.139659	0.0607345	0.9992	15.3078	909975	2	1	8
9	MG-132	VA-ES-BJ	0.721941	0.0174958	-0.662705	0.0770754	0.9996	-10.6527	688121	2	1	8
9	MG-132	NCI-H128	0.932536	0.00938554	1.55666	1.71406	0.4172	36.0884	753597	2	1	8
9	MG-132	ARH-77	0.74759	0.0108554	-0.578512	0.0278403	1	-13.4851	906765	2	1	8
9	MG-132	MFH-ino	0.632083	0.0463143	-0.899642	0.135921	0.9994	-25.5856	925343	2	1	8
9	MG-132	IST-MEL1	0.747674	0.0239367	-0.509849	0.118189	1	-14.2007	907172	2	1	8
9	MG-132	SU-DHL-6	0.573304	0.0157049	-1.14289	0.0576555	1	-7.76382	1331037	2	1	8
9	MG-132	EW-1	0.564852	0.0292942	-1.32771	0.45341	0.9772	-23.0142	949163	2	1	8
9	MG-132	OCUB-M	0.488986	0.0245872	-1.43984	0.110565	1	-8.00476	909256	2	1	8
9	MG-132	LB2518-MEL	0.457458	0.0142617	-1.38506	0.053034	1	3.73795	753579	2	1	8
9	MG-132	TGBC1TKB	0.802674	0.0945224	-0.422732	0.330739	0.9996	-18.9064	909769	2	1	8
9	MG-132	LB996-RCC	0.783872	0.0317359	-0.5238	0.147166	0.9994	-11.0572	753585	2	1	8
9	MG-132	SIMA	0.967648	0.00628707	1.9637	1.69064	0.2524	25.9919	753620	2	1	8
9	MG-132	NAMALWA	0.650041	0.0212985	-0.909451	0.0820787	1	-13.7085	908159	2	1	8
9	MG-132	ALL-SIL	0.691258	0.027902	-0.754587	0.0997322	1	-27.855	1295740	2	1	8
9	MG-132	GA-10	0.7408	0.0244456	-0.623364	0.0591387	0.9998	-7.50537	1303896	2	1	8
9	MG-132	MKL-2	0.899067	0.0091133	-0.203354	0.0304582	1	-9.29767	1333015	2	1	8
9	MG-132	TE-15	0.912335	0.00852431	-0.164049	0.0421329	1	24.3637	753614	2	1	8
9	MG-132	COLO-829	0.737938	0.0140863	-0.66911	0.0522924	1	6.72651	687448	2	1	8
9	MG-132	LAN-6	0.791114	0.0123408	-0.499977	0.0523178	1	5.16397	949170	2	1	8
9	MG-132	DEL	0.90713	0.0118332	2.29363	1.84852	0.3384	1.70092	906836	2	1	8
9	MG-132	OS-RC-2	0.682216	0.0340119	-0.745715	0.188319	0.9998	-25.5169	909250	2	1	8
9	MG-132	HSC-39	0.954272	0.00562713	-0.0231302	0.0962985	0.9968	29.0604	1322224	2	1	8
9	MG-132	NCI-H69	0.677712	0.0141429	-0.779913	0.0475245	1	-10.0562	688027	2	1	8
9	MG-132	LB771-HNC	0.582702	0.0156303	-1.15606	0.0637286	0.9998	1.95624	753583	2	1	8
9	MG-132	TE-6	0.828528	0.0164168	1.12624	1.47864	0.769	-2.16287	946355	2	1	8
9	MG-132	DB	0.793958	0.0211303	-0.478381	0.0700676	1	-7.03519	906832	2	1	8
9	MG-132	NCI-H211	0.985898	0.00359212	2.9359	1.41017	0.0104	11.1485	1240189	2	1	8
[truncated: 223,387+ more rows]
