# Supplementary figures and images for: A statistical framework for assessing pharmacological responses and biomarkers using uncertainty estimates
Source: eLife journal article supplement (doi:10.7554/elife.60352), 2020-12-04

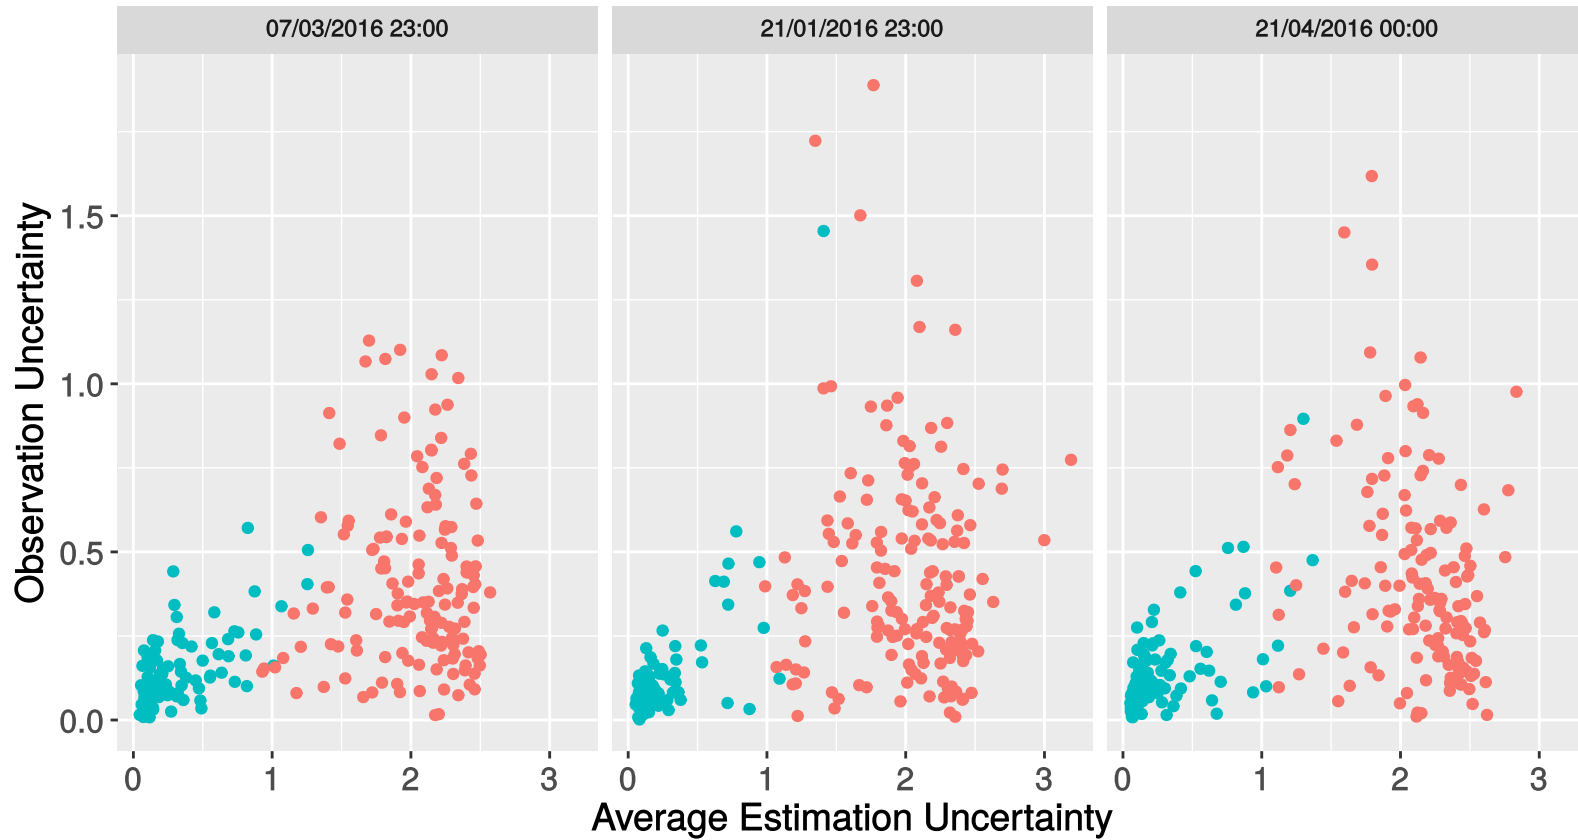

Log10 IC50 Value

- Outside concentration range
- Within concentration range

Supplement: supp [file elife-60352-supp-v1.zip]

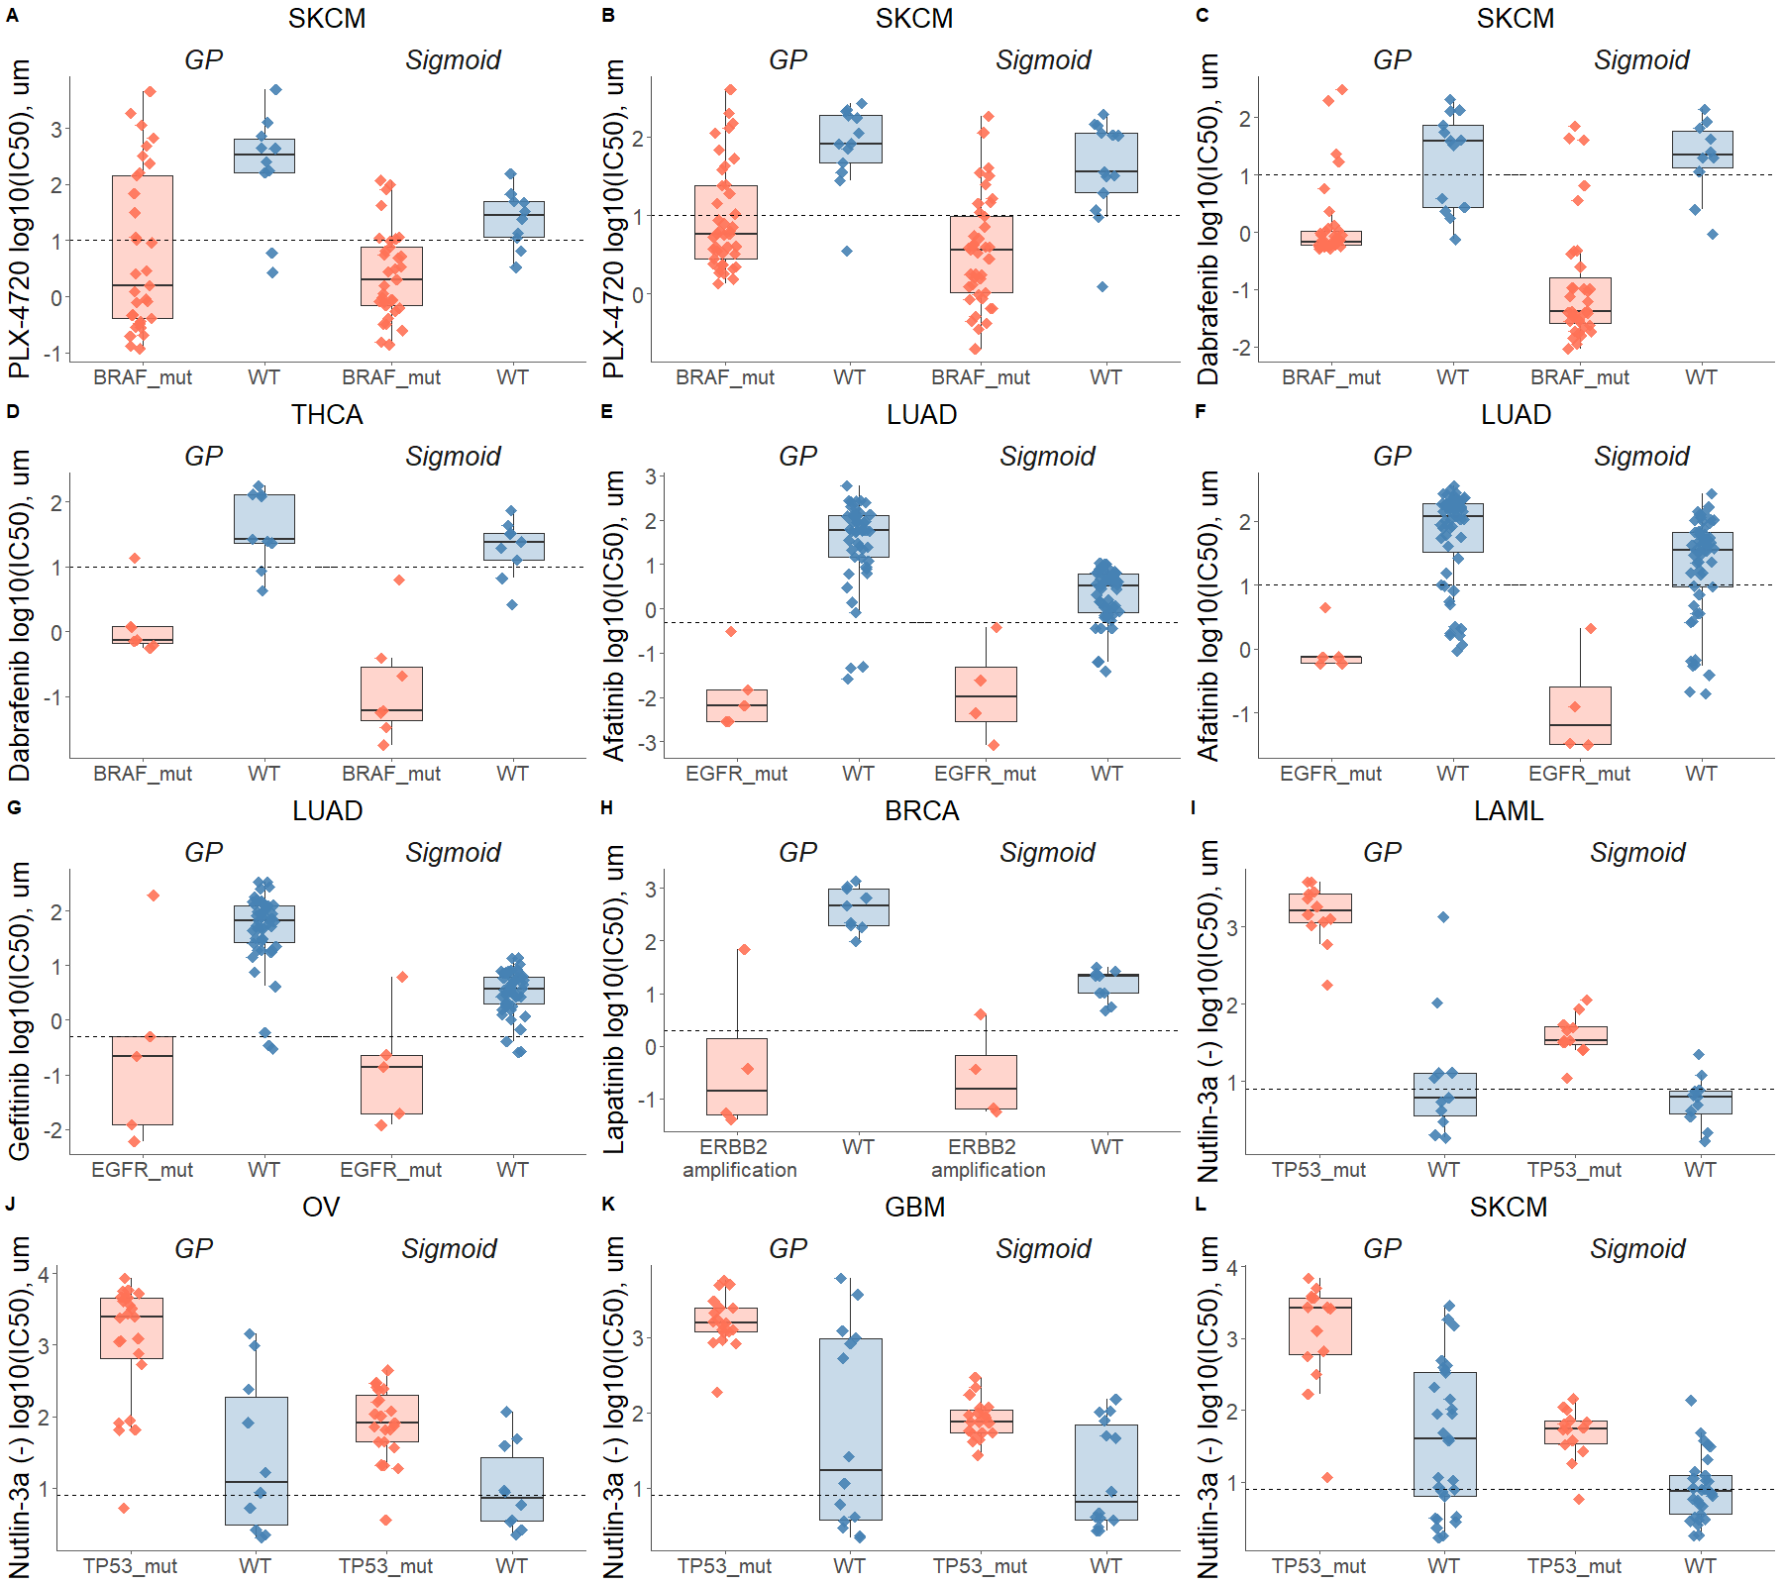

Supplement: supp [file elife-60352-supp-v1.zip]

**A**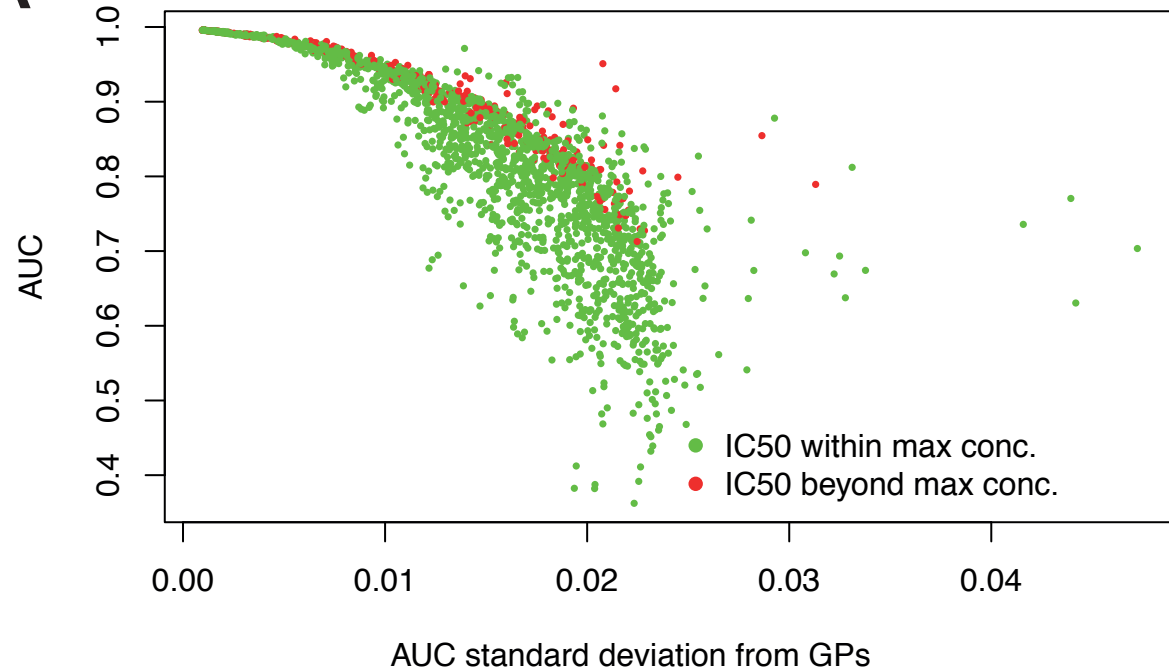**B**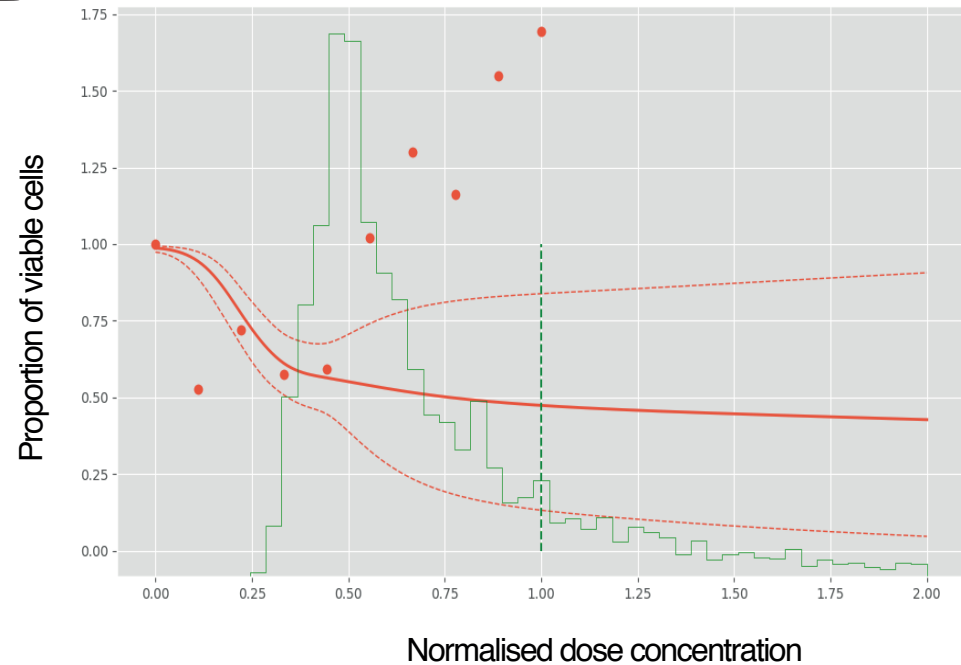

Supplement: supp [file elife-60352-supp-v1.zip]

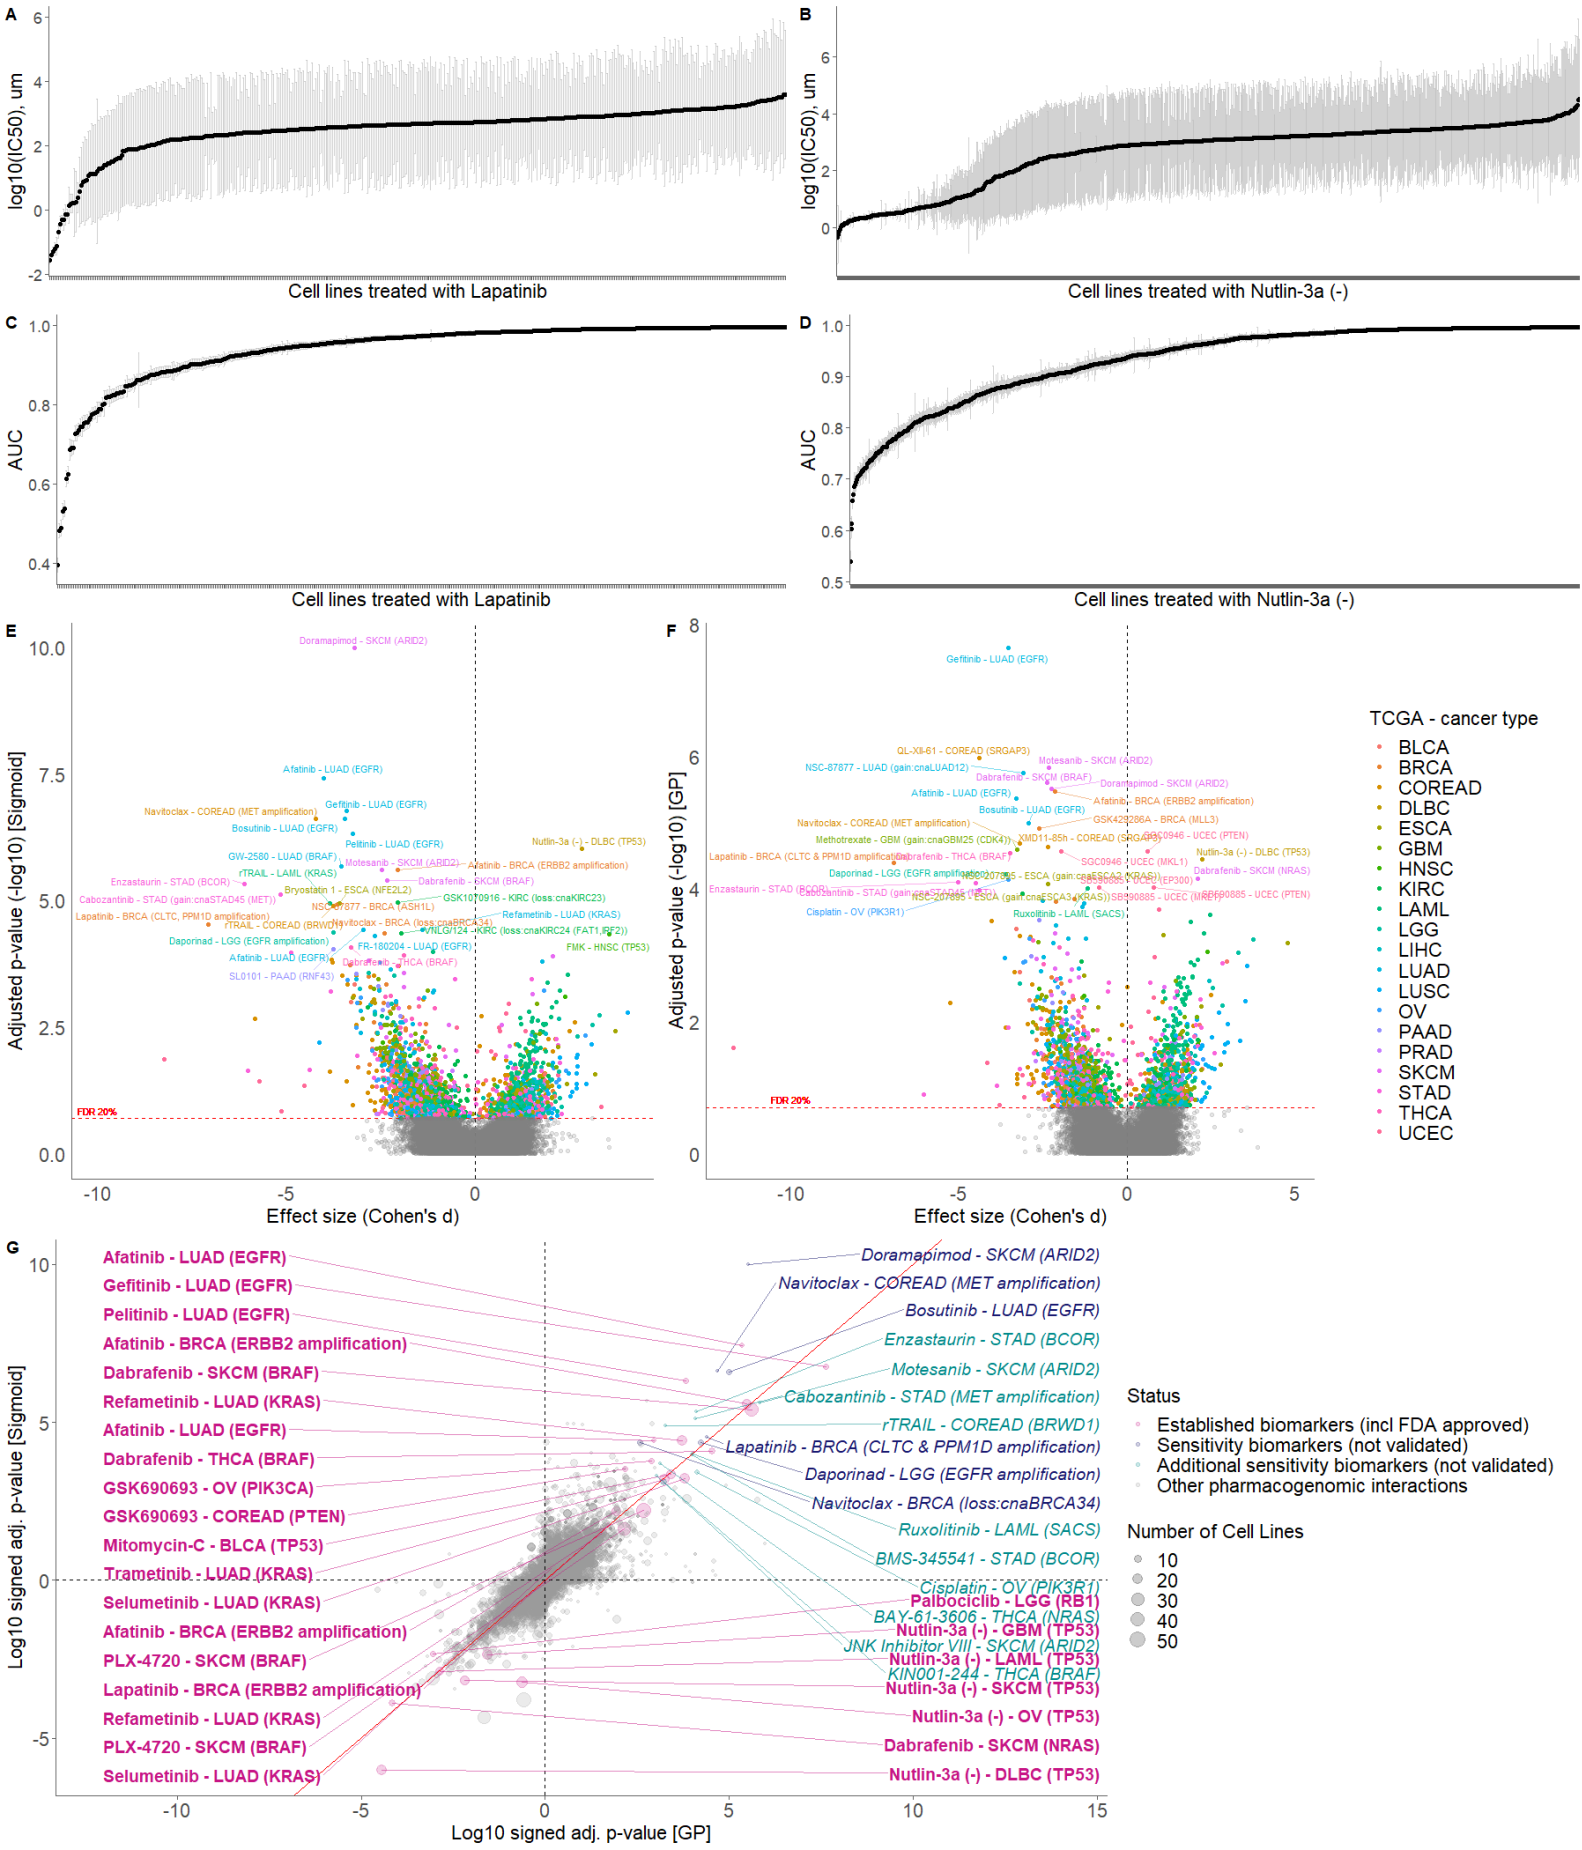

Supplement: supp [file elife-60352-supp-v1.zip]

**A**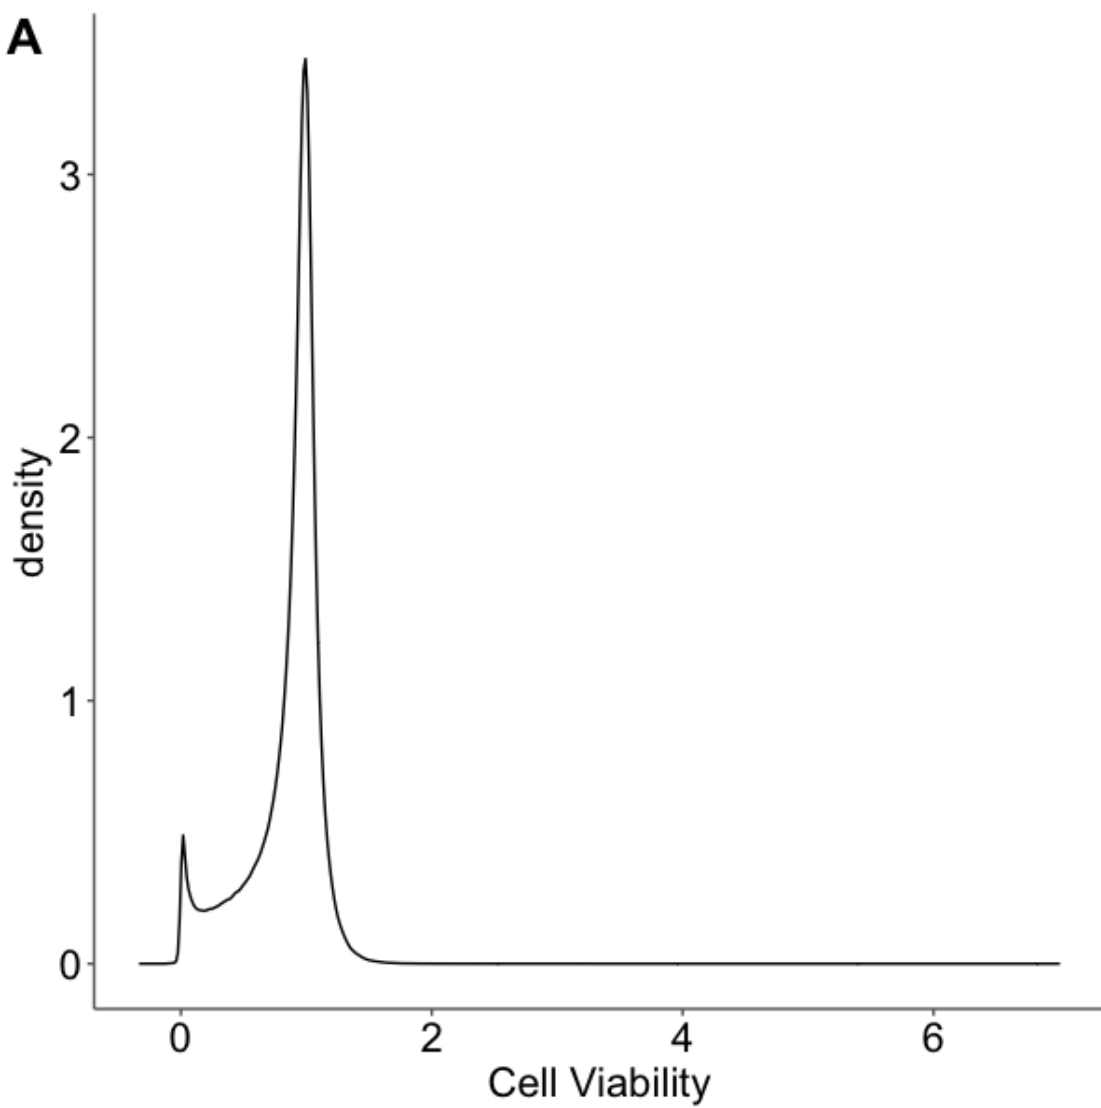**B**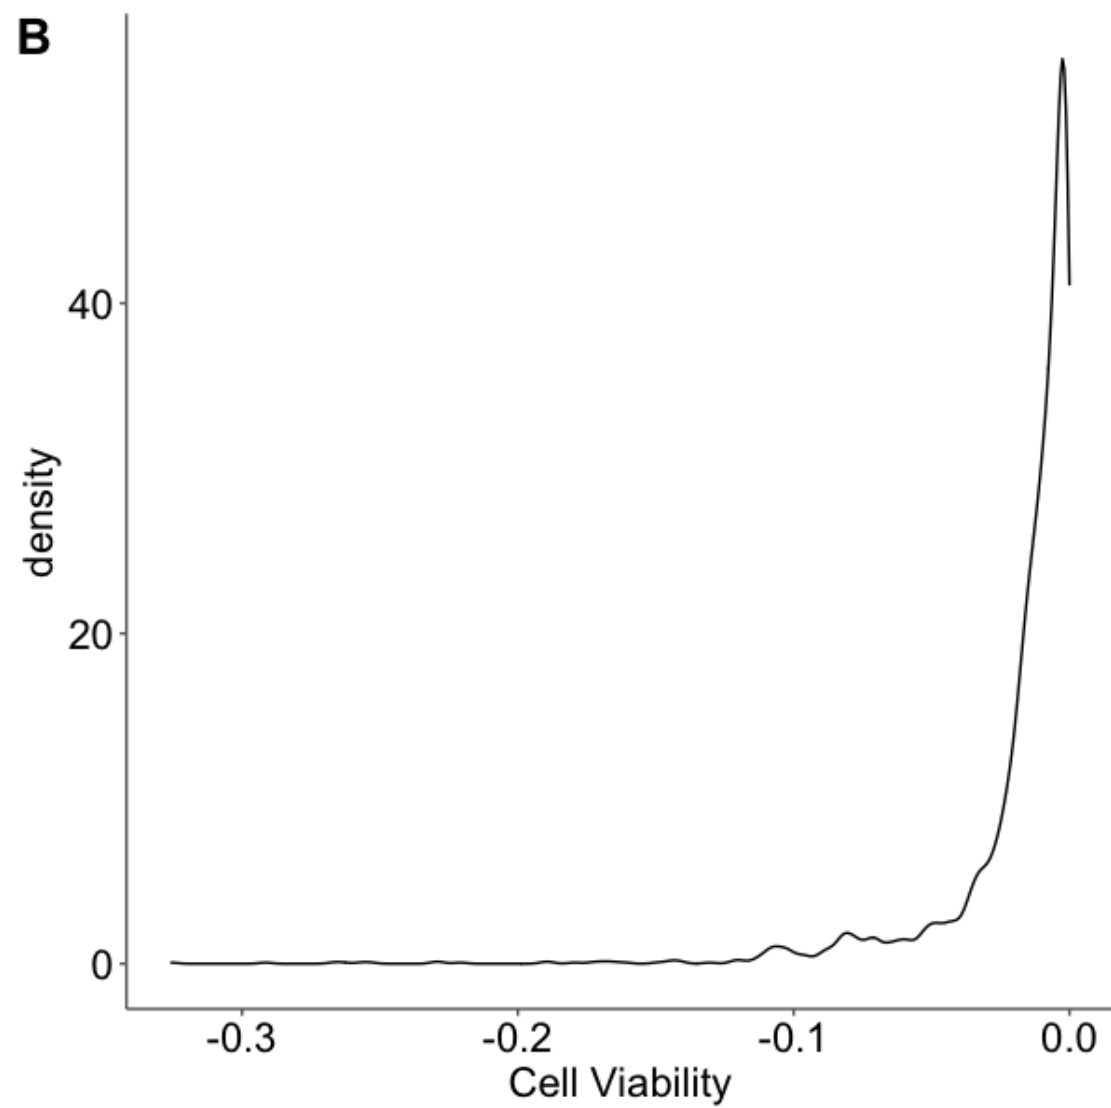

Supplement: supp [file elife-60352-supp-v1.zip]

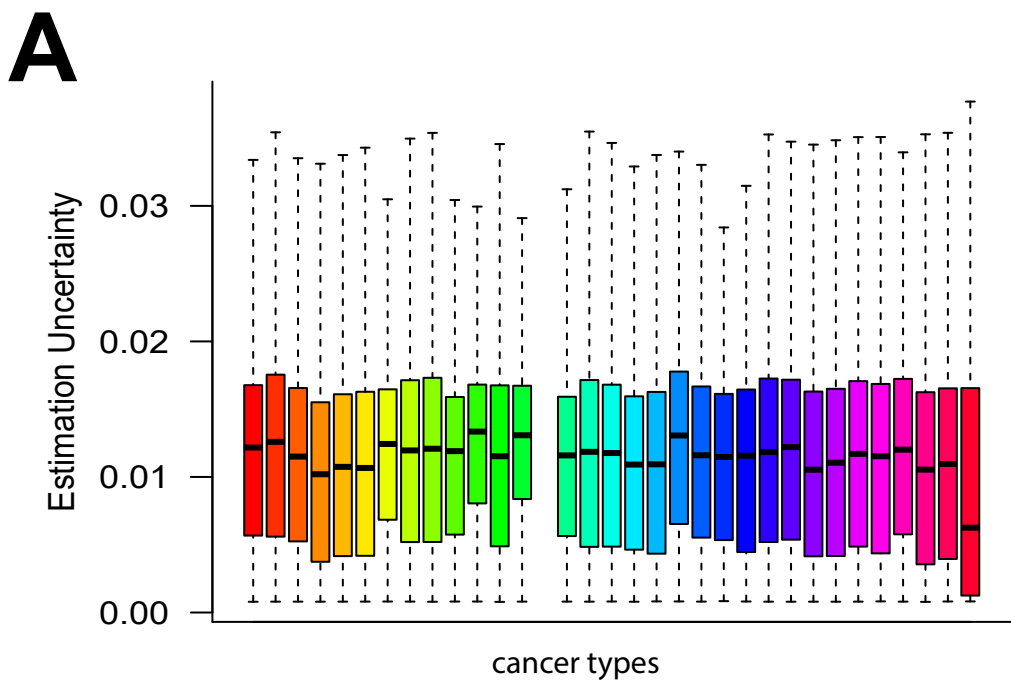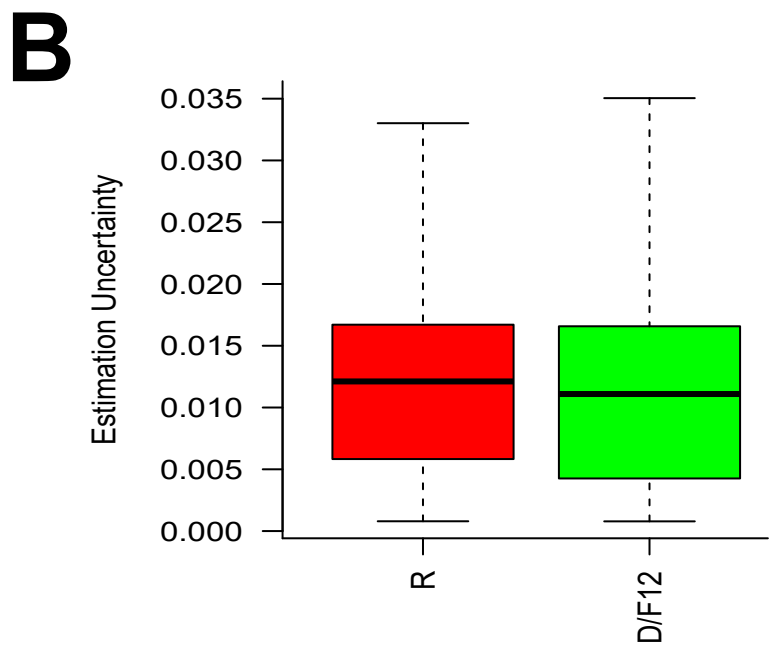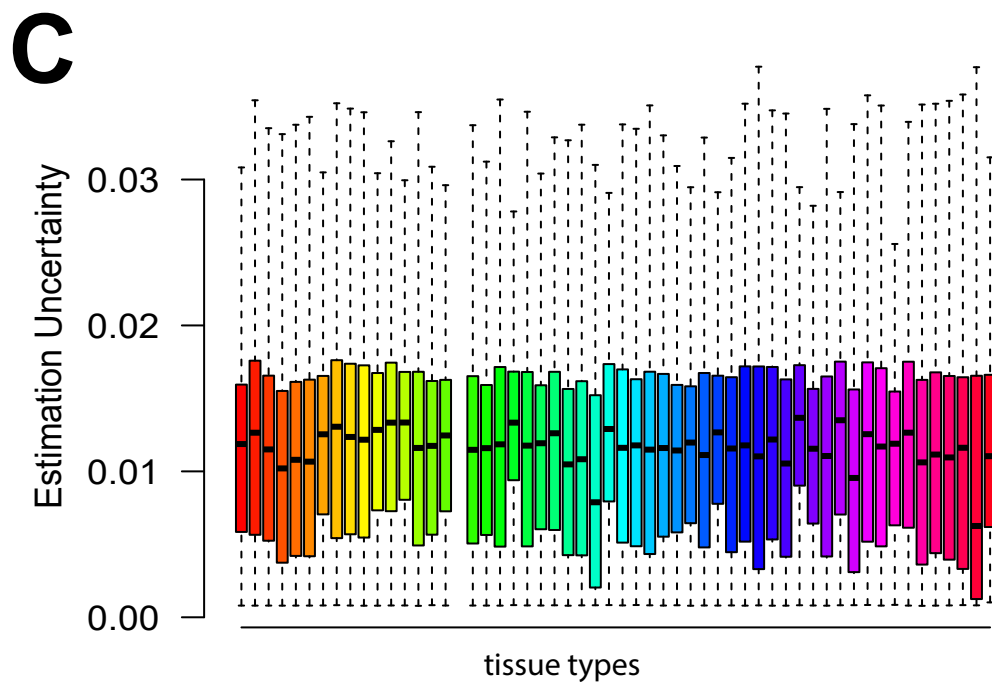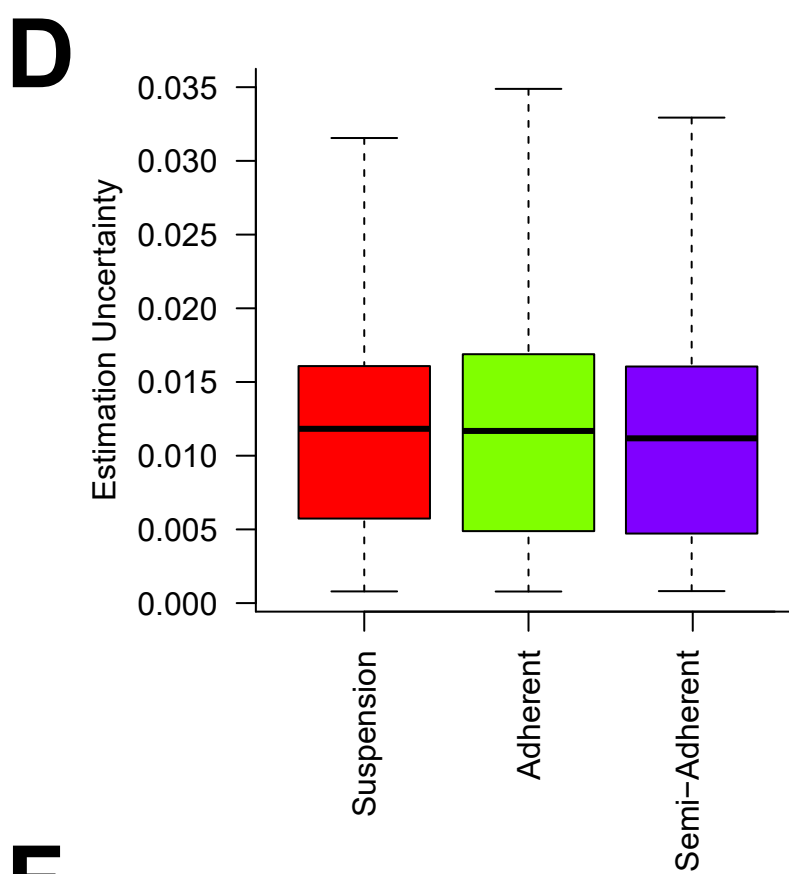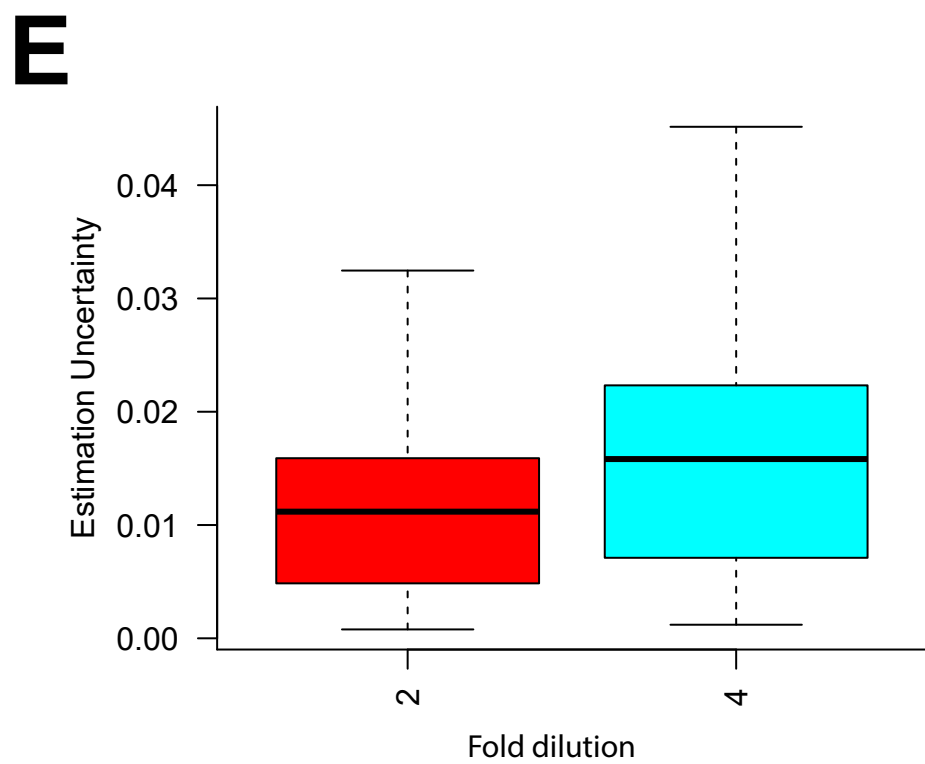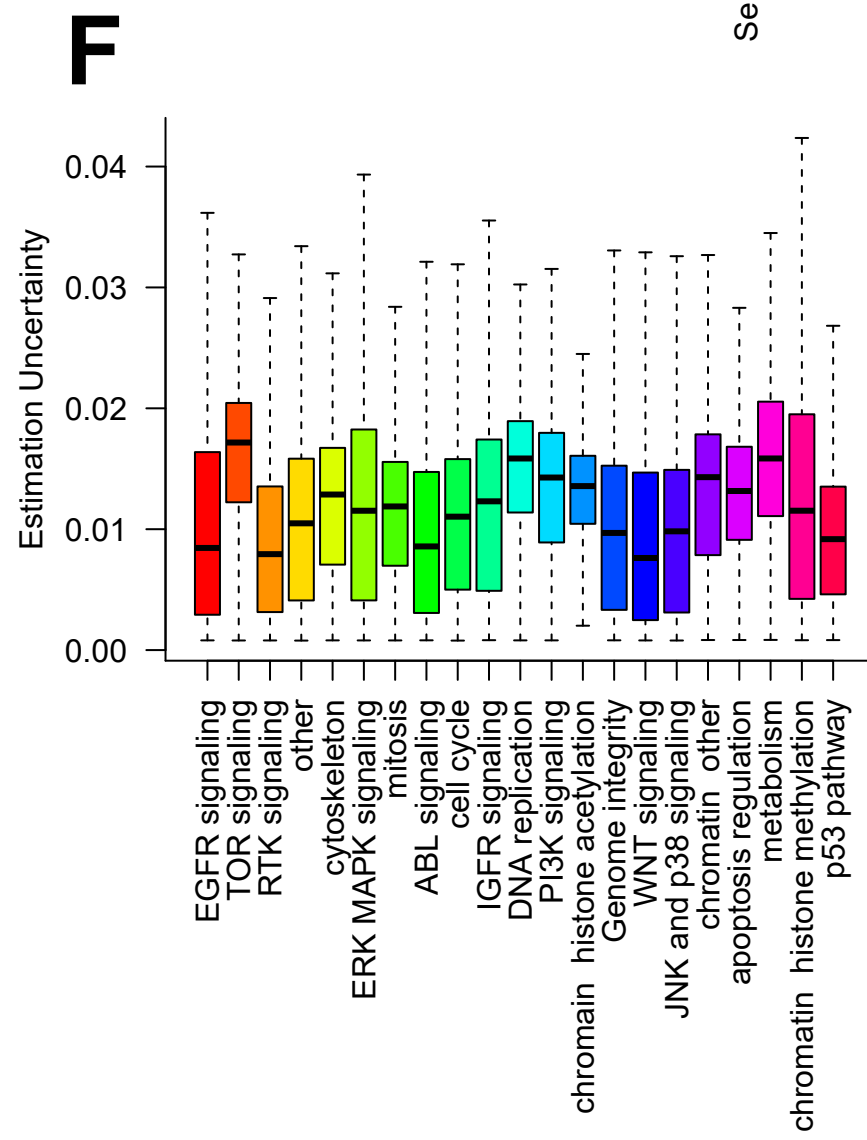

Supplement: supp [file elife-60352-supp-v1.zip]
